# Supplementary material for: Screening of Streptococcus Suis serotype 2 resistance genes with GWAS and transcriptomic microarray analysis
Source: BMC Genomics. 2018 Dec 12;19:907. doi: 10.1186/s12864-018-5339-9 (PMC6292034; doi:10.1186/s12864-018-5339-9)
Supplement: Supplementary file 3 — Table S2. Duplicated DEGs among groups 1, 2 and 3 of Table 3. (XLSX 195 kb) [file 12864_2018_5339_MOESM3_ESM.xlsx]

## Sheet: reslut111213
Transcript Cluster ID	Fold Change (linear) (B6_8hour vs. AJ_8hour)	ANOVA p-value (B6_8hour vs. AJ_8hour)	Fold Change (linear) (B6_4hour vs. AJ_4hour)	ANOVA p-value (B6_4hour vs. AJ_4hour)	Fold Change (linear) (B6_2hour vs. AJ_2hour)	ANOVA p-value (B6_2hour vs. AJ_2hour)		Probe Set ID	Gene Symbol	Gene Description	Strand	Public Gene IDs	Chromosome	Genomic Position	Group	TC Comment	Start	Stop	total_probes	Cytoband	Entrez ID	mRNA Accession	mRNA Source	mRNA Description	mRNA SeqName	mRNA Assignment Score	mRNA Assignment Coverage	mRNA Direct Probes	mRNA Possible Probes	mRNA xhyb	SwissProt mRNA Accession	SwissProt Accession	UniGene Accession	UniGene ID	UniGene Expression Information	GO Biological Process Accession	GO Biological Process ID	GO Biological Process Term	GO Biological Process Evidence	GO Cellular Component Accession	GO Cellular Component ID	GO Cellular Component Term	GO Cellular Component Evidence	GO Melecular Function Accession	GO Molecular Function ID	GO Molecular Function Term	GO Molecular Function Evidence	Pathway Accession	Pathway Source
TC0100000372.mm.1	4.73	0.031898	2.52	0.010478	2.67	0.014483		TC0100000372.mm.1	Sdpr	serum deprivation response	+	NM_138741	chr1	51289126 - 51302960	Coding		51289126	51302960	30	1 C1.1|1	20324	NM_138741	RefSeq	Mus musculus serum deprivation response (Sdpr), mRNA.	chr1	100	100	0		0	NM_138741	Q63918	NM_138741	Mm.398690	bladder| blood| bone| bone marrow| brain| connective tissue| dorsal root ganglion| embryonic tissue| extraembryonic tissue| eye| heart| intestine| kidney| liver| lung| lymph node| mammary gland| muscle| pancreas| pineal gland| pituitary gland| prostate| skin| spleen| testis| thymus| uterus| organogenesis| fetus| neonate| juvenile| adult	NM_138741	GO:0045944	positive regulation of transcription from RNA polymerase II promoter	not recorded	NM_138741	GO:0005737	cytoplasm	not recorded	NM_138741	GO:0001786	phosphatidylserine binding	not recorded
TC0100001005.mm.1	2.34	0.045324	3.06	0.005012	3.26	0.047147		TC0100001005.mm.1	Gm3608	predicted gene 3608	+	ENSMUST00000086725	chr1	105455971 - 105458829	Pseudogene		105455971	105458829	30			ENSMUST00000086725	ENSEMBL	ensembl:known chromosome:GRCm38:1:105455971:105458829:1 gene:ENSMUSG00000067017 gene_biotype:pseudogene transcript_biotype:pseudogene	chr1	100	100	0		0	ENSMUST00000086725	Q5RKN9	ENSMUST00000086725	Mm.483165	testis| adult	ENSMUST00000086725	GO:0030036	actin cytoskeleton organization	inferred from electronic annotation	ENSMUST00000086725	GO:0005911	cell-cell junction	inferred from direct assay	ENSMUST00000086725	GO:0003779	actin binding	inferred from electronic annotation
TC0100001252.mm.1	16.09	0.002294	6.74	6.6e-05	9.49	0.007769		TC0100001252.mm.1	Csrp1	cysteine and glycine-rich protein 1	+	NM_007791	chr1	135720061 - 135752232	Coding		135720061	135752232	90	1 E4|1	13007	NM_007791	RefSeq	Mus musculus cysteine and glycine-rich protein 1 (Csrp1), mRNA.	chr1	100	100	0		0	NM_007791	P97315	NM_007791	Mm.196484	adipose tissue| bladder| blood| bone marrow| brain| connective tissue| dorsal root ganglion| embryonic tissue| epididymis| extraembryonic tissue| eye| heart| inner ear| intestine| joint| kidney| liver| lung| mammary gland| muscle| nasopharynx| ovary| oviduct| pancreas| pineal gland| prostate| salivary gland| skin| spinal cord| spleen| stomach| sympathetic ganglion| testis| thymus| thyroid| uterus…	NM_007791	GO:0030036	actin cytoskeleton organization	traceable author statement	NM_007791	GO:0005634	nucleus	inferred from electronic annotation	NM_007791	GO:0005515	protein binding	inferred from physical interaction
TC0100001632.mm.1	5.41	0.013884	4.56	0.004791	3.33	0.030247		TC0100001632.mm.1	Pyhin1	pyrin and HIN domain family, member 1	+	NM_175026	chr1	173630859 - 173647928	Complex		173630859	173647928	120	1 H3|1	236312	NM_175026	RefSeq	Mus musculus pyrin and HIN domain family, member 1 (Pyhin1), mRNA.	chr1	100	100	0		0	NM_175026	Q8BV49	NM_175026	Mm.447	blood| bone| bone marrow| embryonic tissue| lymph node| mammary gland| oviduct| spleen| testis| thymus| blastocyst| juvenile| adult	NM_175026	GO:0035458	cellular response to interferon-beta	inferred from direct assay	NM_175026	GO:0005634	nucleus	not recorded	NM_175026	GO:0003690	double-stranded DNA binding	not recorded
TC0100001633.mm.1	6	0.016156	3.31	0.018952	4.8	0.027799		TC0100001633.mm.1			+		chr1	173631856 - 173633312	NonCoding		173631856	173633312	30			NONMMUT003874	NONCODE	Non-coding transcript identified by NONCODE: Sense No Exonic	chr1	100	100	0		0
TC0100002644.mm.1	2.38	0.000129	2.28	0.001436	2.08	0.00166		TC0100002644.mm.1	Wdfy1	WD repeat and FYVE domain containing 1	-	NM_001111279	chr1	79702262 - 79776143	Complex		79702262	79776143	270	1|1 C4	69368	NM_001111279	RefSeq	Mus musculus WD repeat and FYVE domain containing 1 (Wdfy1), transcript variant 1, mRNA.	chr1	100	100	0		0	NM_001111279	D3YWG9	NM_001111279	Mm.293273	bladder| blood| bone| bone marrow| brain| connective tissue| embryonic tissue| extraembryonic tissue| eye| fertilized ovum| heart| inner ear| intestine| kidney| liver| lung| lymph node| mammary gland| muscle| nasopharynx| olfactory mucosa| pituitary gland| salivary gland| skin| spleen| sympathetic ganglion| testis| thymus| zygote| cleavage| blastocyst| egg cylinder| gastrula| organogenesis| fetus…	NM_001111279	GO:0008150	biological_process	no biological data available	NM_001111279	GO:0005634	nucleus	not recorded	NM_001111279	GO:0005545	1-phosphatidylinositol binding	not recorded
TC0100002645.mm.1	2.77	0.005884	2.47	0.001563	2.54	0.025552		TC0100002645.mm.1	Serpine2	serine (or cysteine) peptidase inhibitor, clade E, member 2	-	NM_009255	chr1	79794197 - 79858696	Complex		79794197	79858696	163	1 C4|1 40.97 cM	20720	NM_009255	RefSeq	Mus musculus serine (or cysteine) peptidase inhibitor, clade E, member 2 (Serpine2), mRNA.	chr1	100	100	0		0	NM_009255	Q07235	NM_009255	Mm.3093	adipose tissue| bladder| blood| bone| bone marrow| brain| connective tissue| dorsal root ganglion| embryonic tissue| extraembryonic tissue| eye| fertilized ovum| inner ear| intestine| joint| kidney| liver| lung| mammary gland| molar| muscle| nasopharynx| olfactory mucosa| ovary| pancreas| pineal gland| pituitary gland| prostate| skin| spinal cord| spleen| stomach| sympathetic ganglion| testis| th…	NM_009255	GO:0007275	multicellular organismal development	inferred from electronic annotation	NM_009255	GO:0005576	extracellular region	inferred from direct assay	NM_009255	GO:0004867	serine-type endopeptidase inhibitor activity	inferred from mutant phenotype
TC0100003533.mm.1	3.13	0.001793	3.27	0.000383	7.82	0.006224		TC0100003533.mm.1	Fcer1g	Fc receptor, IgE, high affinity I, gamma polypeptide	-	NM_010185	chr1	171229572 - 171234365	Complex		171229572	171234365	60	1 H3|1 79.23 cM	14127	NM_010185	RefSeq	Mus musculus Fc receptor, IgE, high affinity I, gamma polypeptide (Fcer1g), mRNA.	chr1	100	100	0		0	NM_010185	P20491	NM_010185	Mm.22673	blood| bone marrow| brain| embryonic tissue| eye| heart| joint| liver| lung| lymph node| mammary gland| prostate| skin| spleen| testis| thyroid| cleavage| organogenesis| fetus| neonate| juvenile| adult	NM_010185	GO:0001798	positive regulation of type IIa hypersensitivity	inferred from mutant phenotype	NM_010185	GO:0005886	plasma membrane	inferred from electronic annotation	NM_010185	GO:0004888	transmembrane signaling receptor activity	inferred from electronic annotation
TC0100003577.mm.1	2.65	0.001689	3.34	0.002635	2.47	0.011425		TC0100003577.mm.1	Dusp23	dual specificity phosphatase 23	-	NM_026725	chr1	172630769 - 172632974	Coding		172630769	172632974	30	1 H3|1	68440	NM_026725	RefSeq	Mus musculus dual specificity phosphatase 23 (Dusp23), mRNA.	chr1	100	100	0		0	NM_026725	Q6NT99	NM_026725	Mm.33024	bone marrow| extraembryonic tissue| heart| kidney| liver| mammary gland| pineal gland| fetus| juvenile| adult	NM_026725	GO:0006470	protein dephosphorylation	inferred from electronic annotation	NM_026725	GO:0005634	nucleus	inferred from electronic annotation	NM_026725	GO:0004721	phosphoprotein phosphatase activity	inferred from electronic annotation
TC0100003589.mm.1	3.38	0.002452	3.07	0.018622	3.52	0.012368		TC0100003589.mm.1	Gm4955	predicted gene 4955	-	ENSMUST00000037976	chr1	173468413 - 173491041	Coding		173468413	173491041	100			ENSMUST00000037976	ENSEMBL	havana:putative chromosome:GRCm38:1:173468509:173474052:-1 gene:ENSMUSG00000037849 gene_biotype:protein_coding transcript_biotype:protein_coding	chr1	100	100	0		0	ENSMUST00000037976	G3UY50	ENSMUST00000037976	Mm.330566	spleen| juvenile
TC0100003591.mm.1	2.56	0.028496	2.14	0.00911	2.53	0.00823		TC0100003591.mm.1	Pydc4	pyrin domain containing 4	-	NM_001177349	chr1	173566284 - 173599274	Complex		173566284	173599274	190	1 H3|1	623121	NM_001177349	RefSeq	Mus musculus pyrin domain containing 4 (Pydc4), transcript variant 1, mRNA.	chr1	100	100	0		0	NM_001177349	D3Z5G0	NM_001177349	Mm.479935	bone| bone marrow| lung| lymph node| mammary gland| spleen| thymus| neonate| juvenile| adult	NM_001177349	GO:0008150	biological_process	no biological data available	NM_001177349	GO:0005634	nucleus	not recorded	NM_001177349	GO:0003690	double-stranded DNA binding	not recorded
TC0100003890.mm.1	12.27	0.0136	7.15	0.00162	7.41	0.003394		TC0100003890.mm.1	Mndal	myeloid nuclear differentiation antigen like	-	NM_001170853	chr1	173857220 - 173880187	Complex		173857220	173880187	184	1 H3|1	100040462	NM_001170853	RefSeq	Mus musculus myeloid nuclear differentiation antigen like (Mndal), mRNA.	chr1	100	100	0		0	NM_001170853	O35368	NM_001170853	Mm.463437	bladder| bone marrow| brain| connective tissue| embryonic tissue| kidney| liver| lymph node| mammary gland| skin| spleen| thymus| fetus| neonate| juvenile| adult	NM_001170853	GO:0030308	negative regulation of cell growth	inferred from mutant phenotype	NM_001170853	GO:0005634	nucleus	inferred from direct assay	NM_001170853	GO:0003690	double-stranded DNA binding	not recorded
TC0100003891.mm.1	3.24	0.029231	3.32	0.013643	2.55	0.039751		TC0100003891.mm.1	Ifi203	interferon activated gene 203	-	NM_001045481	chr1	173920400 - 173942672	Complex		173920400	173942672	200	1 H3|1 80.76 cM	15950	NM_001045481	RefSeq	Mus musculus interferon activated gene 203 (Ifi203), transcript variant 1, mRNA.	chr1	100	100	0		0	NM_001045481	O35368	NM_001045481	Mm.463437	bladder| bone marrow| brain| connective tissue| embryonic tissue| kidney| liver| lymph node| mammary gland| skin| spleen| thymus| fetus| neonate| juvenile| adult	NM_001045481	GO:0035458	cellular response to interferon-beta	inferred from direct assay	NM_001045481	GO:0005634	nucleus	not recorded	NM_001045481	GO:0003690	double-stranded DNA binding	not recorded
TC0200001206.mm.1	3.22	0.035495	2.26	0.001229	3.05	0.01157		TC0200001206.mm.1	Gm13698	predicted gene 13698	+	ENSMUST00000178325	chr2	83955693 - 83958185	Coding		83955693	83958185	42			ENSMUST00000178325	ENSEMBL	ensembl:known chromosome:GRCm38:2:83956398:83957184:1 gene:ENSMUSG00000094125 gene_biotype:protein_coding transcript_biotype:protein_coding	chr2	100	100	0		0	ENSMUST00000178325	J3QNR0				ENSMUST00000178325	GO:0016070	RNA metabolic process	inferred from electronic annotation					ENSMUST00000178325	GO:0005515	protein binding	inferred from electronic annotation
TC0200001207.mm.1	3.22	0.035495	2.26	0.001229	3.05	0.01157		TC0200001207.mm.1	Gm13693	predicted gene 13693	+	ENSMUST00000178960	chr2	83961503 - 83963995	Coding		83961503	83963995	42			ENSMUST00000178960	ENSEMBL	havana:known chromosome:GRCm38:2:83961503:83963995:1 gene:ENSMUSG00000094336 gene_biotype:protein_coding transcript_biotype:protein_coding	chr2	100	100	0		0	ENSMUST00000178960	A2AK42				ENSMUST00000178960	GO:0016070	RNA metabolic process	inferred from electronic annotation					ENSMUST00000178960	GO:0005515	protein binding	inferred from electronic annotation
TC0200001208.mm.1	2.53	0.035477	2.26	0.000361	2.65	0.01257		TC0200001208.mm.1	Gm13695	predicted gene 13695	+	ENSMUST00000099951	chr2	83967313 - 83969805	Coding		83967313	83969805	42			ENSMUST00000099951	ENSEMBL	havana:known chromosome:GRCm38:2:83967313:83969805:1 gene:ENSMUSG00000096729 gene_biotype:protein_coding transcript_biotype:protein_coding	chr2	100	100	0		0	ENSMUST00000099951	A2AK44				ENSMUST00000099951	GO:0008150	biological_process	no biological data available	ENSMUST00000099951	GO:0005575	cellular_component	no biological data available	ENSMUST00000099951	GO:0005515	protein binding	inferred from electronic annotation
TC0200001209.mm.1	3.22	0.035495	2.26	0.001229	3.05	0.01157		TC0200001209.mm.1	Gm13696	predicted gene 13696	+	ENSMUST00000179311	chr2	83973123 - 83975615	Coding		83973123	83975615	42			ENSMUST00000179311	ENSEMBL	ensembl:known chromosome:GRCm38:2:83973828:83974614:1 gene:ENSMUSG00000096484 gene_biotype:protein_coding transcript_biotype:protein_coding	chr2	100	100	0		0	ENSMUST00000179311	J3QNR0				ENSMUST00000179311	GO:0016070	RNA metabolic process	inferred from electronic annotation					ENSMUST00000179311	GO:0005515	protein binding	inferred from electronic annotation
TC0200001210.mm.1	3.22	0.035495	2.26	0.001229	3.05	0.01157		TC0200001210.mm.1	Gm13694	predicted gene 13694	+	ENSMUST00000178533	chr2	83978933 - 83981425	Coding		83978933	83981425	42			ENSMUST00000178533	ENSEMBL	havana:known chromosome:GRCm38:2:83978933:83981425:1 gene:ENSMUSG00000096337 gene_biotype:protein_coding transcript_biotype:protein_coding	chr2	100	100	0		0	ENSMUST00000178533	A2AK42				ENSMUST00000178533	GO:0016070	RNA metabolic process	inferred from electronic annotation					ENSMUST00000178533	GO:0005515	protein binding	inferred from electronic annotation
TC0200001211.mm.1	3.22	0.035495	2.26	0.001229	3.05	0.01157		TC0200001211.mm.1	Gm13697	predicted gene 13697	+	ENSMUST00000099948	chr2	83984743 - 83987235	Coding		83984743	83987235	42			ENSMUST00000099948	ENSEMBL	havana:known chromosome:GRCm38:2:83984743:83987235:1 gene:ENSMUSG00000095824 gene_biotype:protein_coding transcript_biotype:protein_coding	chr2	100	100	0		0	ENSMUST00000099948	A2AK42				ENSMUST00000099948	GO:0016070	RNA metabolic process	inferred from electronic annotation					ENSMUST00000099948	GO:0005515	protein binding	inferred from electronic annotation
TC0200001729.mm.1	40.45	0.007997	7.78	0.004239	26.72	0.007733		TC0200001729.mm.1	Thbs1	thrombospondin 1	+	NM_011580	chr2	118111876 - 118127133	Complex		118111876	118127133	250	2 F1-F3|2 59.34 cM	21825	NM_011580	RefSeq	Mus musculus thrombospondin 1 (Thbs1), mRNA.	chr2	100	100	0		0	NM_011580	P35441	NM_011580	Mm.4159	blood| bone| bone marrow| brain| connective tissue| embryonic tissue| extraembryonic tissue| eye| heart| inner ear| kidney| lung| mammary gland| molar| muscle| ovary| pancreas| pineal gland| skin| spleen| testis| thymus| thyroid| vagina| blastocyst| organogenesis| fetus| neonate| juvenile| adult					NM_011580	GO:0005576	extracellular region	inferred from electronic annotation	NM_011580	GO:0001786	phosphatidylserine binding	not recorded	NM_011580	GenMAPP
TC0200001773.mm.1	3.14	0.002339	5.83	1.1e-05	4.21	0.000589		TC0200001773.mm.1	Chp1	calcineurin-like EF hand protein 1	+	NM_019769	chr2	119547697 - 119587027	Complex		119547697	119587027	160	2 E5|2	56398	NM_019769	RefSeq	Mus musculus calcineurin-like EF hand protein 1 (Chp1), mRNA.	chr2	100	100	0		0	NM_019769	P61022	NM_019769	Mm.214765	adipose tissue| bladder| blood| bone| bone marrow| brain| connective tissue| dorsal root ganglion| embryonic tissue| extraembryonic tissue| eye| fertilized ovum| heart| inner ear| intestine| joint| kidney| liver| lung| mammary gland| muscle| olfactory mucosa| ovary| pancreas| pineal gland| pituitary gland| prostate| salivary gland| skin| spinal cord| spleen| stomach| sympathetic ganglion| testis|…					NM_019769	GO:0000139	Golgi membrane	not recorded	NM_019769	GO:0004860	protein kinase inhibitor activity	inferred from electronic annotation
TC0200001816.mm.1	2.41	0.001913	2.74	0.012337	2.19	0.01788		TC0200001816.mm.1			+		chr2	121474096 - 121474597	NonCoding		121474096	121474597	30			KnowTID_00004407	Luo lincRNA	Non-coding transcript identified by Luo, et al.	chr2	100	100	0		0
TC0200001843.mm.1	34.09	0.006655	10.57	0.000104	7.13	0.024138		TC0200001843.mm.1	Sord	sorbitol dehydrogenase	+	NM_146126	chr2	122234749 - 122265340	Coding		122234749	122265340	110	2 E5|2 60.59 cM	20322	NM_146126	RefSeq	Mus musculus sorbitol dehydrogenase (Sord), mRNA.	chr2	100	100	0		0	NM_146126	Q64442	NM_146126	Mm.371580	bladder| bone| bone marrow| brain| embryonic tissue| extraembryonic tissue| eye| heart| inner ear| intestine| joint| kidney| liver| lung| mammary gland| muscle| ovary| pancreas| pineal gland| skin| spinal cord| spleen| testis| thymus| thyroid| cleavage| morula| blastocyst| egg cylinder| gastrula| fetus| neonate| juvenile| adult	NM_146126	GO:0006060	sorbitol metabolic process	inferred from direct assay	NM_146126	GO:0005739	mitochondrion	inferred from direct assay	NM_146126	GO:0003939	L-iditol 2-dehydrogenase activity	inferred from direct assay
TC0200002706.mm.1	3.81	0.007267	2.49	0.003011	3.35	0.026431		TC0200002706.mm.1	Tubb1	tubulin, beta 1 class VI	+	NM_001080971	chr2	174450595 - 174458380	Coding		174450595	174458380	80	2 H4|2	545486	NM_001080971	RefSeq	Mus musculus tubulin, beta 1 class VI (Tubb1), mRNA.	chr2	100	100	0		0	NM_001080971	A2AQ07	NM_001080971	Mm.45285	bone| brain| embryonic tissue| heart| liver| testis| organogenesis| fetus| juvenile| adult	NM_001080971	GO:0006184	GTP catabolic process	inferred from electronic annotation	NM_001080971	GO:0005737	cytoplasm	not recorded	NM_001080971	GO:0000166	nucleotide binding	inferred from electronic annotation
TC0200002707.mm.1	25.29	0.002513	6.67	0.000457	12.23	0.011366		TC0200002707.mm.1			+		chr2	174458492 - 174459356	NonCoding		174458492	174459356	30			NONMMUT041650	NONCODE	Non-coding transcript identified by NONCODE: Linc	chr2	100	100	0		0
TC0200003943.mm.1	3.08	0.010238	2.33	0.005024	2.28	0.00991		TC0200003943.mm.1	Olfr1073-ps1	olfactory receptor 1073, pseudogene 1	-	ENSMUST00000117635	chr2	86487918 - 86488805	Complex		86487918	86488805	30			ENSMUST00000117635	ENSEMBL	havana:known chromosome:GRCm38:2:86487918:86488805:-1 gene:ENSMUSG00000082547 gene_biotype:pseudogene transcript_biotype:unprocessed_pseudogene	chr2	100	100	0		0
TC0200004121.mm.1	2.04	0.002378	2.92	0.008968	3.65	0.001921		TC0200004121.mm.1	Gm13770	predicted gene 13770	-	XM_884324	chr2	91523573 - 91523884	Pseudogene		91523573	91523884	30	2 E1|2	619941	XM_884324	RefSeq	PREDICTED: Mus musculus predicted gene 13770 (Gm13770), mRNA.	chr2	100	100	0		0
TC0300000459.mm.1	2.16	0.018365	3.67	0.00063	3.34	0.014127		TC0300000459.mm.1	Selt	selenoprotein T	+	NM_001040396	chr3	58576636 - 58593546	Complex		58576636	58593546	130	3 D|3	69227	NM_001040396	RefSeq	Mus musculus selenoprotein T (Selt), mRNA.	chr3	100	100	0		0	NM_001040396	P62342	NM_001040396	Mm.270950	blood| bone| bone marrow| brain| embryonic tissue| extraembryonic tissue| eye| fertilized ovum| inner ear| intestine| kidney| liver| lung| lymph node| mammary gland| nasopharynx| olfactory mucosa| ovary| pancreas| pituitary gland| prostate| skin| spinal cord| spleen| stomach| testis| thymus| thyroid|oocyte| zygote| cleavage| morula| blastocyst| egg cylinder| gastrula| organogenesis| fetus| neonat…	NM_001040396	GO:0009749	response to glucose	inferred from mutant phenotype	NM_001040396	GO:0005623	cell	inferred from mutant phenotype	NM_001040396	GO:0008430	selenium binding	inferred from electronic annotation
TC0300000853.mm.1	2.24	0.011579	3.66	0.000111	2.94	0.000144		TC0300000853.mm.1	S100a10	S100 calcium binding protein A10 (calpactin)	+	NM_009112	chr3	93555080 - 93564645	Complex		93555080	93564645	82	3 F1-F2|3 40.51 cM	20194	NM_009112	RefSeq	Mus musculus S100 calcium binding protein A10 (calpactin) (S100a10), mRNA.	chr3	100	100	0		0	NM_009112	P08207	NM_009112	Mm.1	adipose tissue| blood| bone marrow| brain| connective tissue| dorsal root ganglion| embryonic tissue| extraembryonic tissue| eye| heart| inner ear| intestine| joint| kidney| liver| lung| lymph node| mammary gland| muscle| ovary| pancreas| pineal gland| pituitary gland| prostate| skin| spleen| stomach| sympathetic ganglion| testis| thyroid| tongue| uterus| cleavage| blastocyst| gastrula| organogen…	NM_009112	GO:0001765	membrane raft assembly	not recorded	NM_009112	GO:0005783	endoplasmic reticulum	not recorded	NM_009112	GO:0005509	calcium ion binding	inferred from electronic annotation	NM_009112	GenMAPP
TC0300000983.mm.1	2.81	0.018088	2.02	0.017255	4.04	0.035108		TC0300000983.mm.1	Gm12428	predicted gene 12428	+	ENSMUST00000119844	chr3	98821038 - 98821764	Pseudogene		98821038	98821764	30			ENSMUST00000119844	ENSEMBL	havana:known chromosome:GRCm38:3:98821038:98821764:1 gene:ENSMUSG00000082185 gene_biotype:pseudogene transcript_biotype:processed_pseudogene	chr3	100	100	0		0
TC0300001295.mm.1	8.99	1.6e-05	18.5	5.1e-05	15.8	0.00046		TC0300001295.mm.1	9830132P13Rik	RIKEN cDNA 9830132P13 gene	+	NR_040552	chr3	127916171 - 127955220	NonCoding		127916171	127955220	50	3 G2|3	329753	NR_040552	RefSeq	Mus musculus RIKEN cDNA 9830132P13 gene (9830132P13Rik), long non-coding RNA.	chr3	100	100	0		0			NR_040552	Mm.119720	bone| adult
TC0300002219.mm.1	8.47	0.012333	5.79	0.005667	3.99	0.007099		TC0300002219.mm.1	Gucy1b3	guanylate cyclase 1, soluble, beta 3	-	NM_001161796	chr3	82032004 - 82074711	Coding		82032004	82074711	150	3 E3|3	54195	NM_001161796	RefSeq	Mus musculus guanylate cyclase 1, soluble, beta 3 (Gucy1b3), transcript variant 2, mRNA.	chr3	100	100	0		0	NM_001161796	O54865	NM_001161796	Mm.9445	bladder| brain| dorsal root ganglion| embryonic tissue| extraembryonic tissue| eye| heart| intestine| joint| kidney| lung| lymph node| mammary gland| spinal cord| sympathetic ganglion| testis| fetus| neonate| juvenile| adult	NM_001161796	GO:0006182	cGMP biosynthetic process	not recorded	NM_001161796	GO:0005737	cytoplasm	not recorded	NM_001161796	GO:0000166	nucleotide binding	inferred from electronic annotation
TC0300002660.mm.1	3.63	0.012208	3.28	0.002344	2.76	0.023406		TC0300002660.mm.1	Capza1	capping protein (actin filament) muscle Z-line, alpha 1	-	NM_009797	chr3	104822779 - 104864505	Complex		104822779	104864505	130	3 F2.2|3 45.88 cM	12340	NM_009797	RefSeq	Mus musculus capping protein (actin filament) muscle Z-line, alpha 1 (Capza1), mRNA.	chr3	100	100	0		0	NM_009797	P47753	NM_009797	Mm.19142	bladder| blood| bone| bone marrow| brain| connective tissue| dorsal root ganglion| embryonic tissue| extraembryonic tissue| eye| fertilized ovum| heart| inner ear| intestine| kidney| liver| lung| lymph node| mammary gland| ovary| pancreas| prostate| skin| spinal cord| spleen| stomach| sympathetic ganglion| testis| thymus| thyroid|oocyte| zygote| cleavage| morula| blastocyst| egg cylinder| gastrul…	NM_009797	GO:0030036	actin cytoskeleton organization	inferred from electronic annotation	NM_009797	GO:0005737	cytoplasm	inferred from electronic annotation	NM_009797	GO:0003779	actin binding	inferred from electronic annotation
TC0300002680.mm.1	8.15	0.001932	4.37	0.010069	3.35	0.013189		TC0300002680.mm.1	I830077J02Rik	RIKEN cDNA I830077J02 gene	-	NM_001033780	chr3	105925891 - 105932664	Complex		105925891	105932664	90	3 F2.2|3	433638	NM_001033780	RefSeq	Mus musculus RIKEN cDNA I830077J02 gene (I830077J02Rik), mRNA.	chr3	100	100	0		0	NM_001033780	Q3U7U4	NM_001033780	Mm.239081	bone marrow| embryonic tissue| inner ear| thymus| cleavage| juvenile| adult	NM_001033780	GO:0008150	biological_process	no biological data available	NM_001033780	GO:0016020	membrane	inferred from electronic annotation	NM_001033780	GO:0003674	molecular_function	no biological data available
TC0300002685.mm.1	2.2	0.025424	3.17	0.000623	2.52	0.004263		TC0300002685.mm.1	Chil4	chitinase-like 4	-	NM_145126	chr3	106201490 - 106219507	Complex		106201490	106219507	139	3 F2.2|3	104183	NM_145126	RefSeq	Mus musculus chitinase-like 4 (Chil4), mRNA.	chr3	100	100	0		0	NM_145126	Q91Z98	NM_145126	Mm.425140	pancreas| tongue| adult	NM_145126	GO:0005975	carbohydrate metabolic process	inferred from electronic annotation	NM_145126	GO:0005576	extracellular region	inferred from electronic annotation	NM_145126	GO:0004553	hydrolase activity, hydrolyzing O-glycosyl compounds	inferred from electronic annotation
TC0300002998.mm.1	3.67	0.016067	2.63	0.038118	2.58	0.022986		TC0300002998.mm.1	Bank1	B cell scaffold protein with ankyrin repeats 1	-	NM_001033350	chr3	136053363 - 136326046	Coding		136053363	136326046	206	3 G3|3 63.04 cM	242248	NM_001033350	RefSeq	Mus musculus B cell scaffold protein with ankyrin repeats 1 (Bank1), mRNA.	chr3	100	100	0		0	NM_001033350	Q80VH0	NM_001033350	Mm.30832	bone| bone marrow| embryonic tissue| inner ear| lung| lymph node| mammary gland| spleen| sympathetic ganglion| testis| thymus| uterus| fetus| neonate| juvenile| adult	NM_001033350	GO:0042113	B cell activation	inferred from electronic annotation	NM_001033350	GO:0005575	cellular_component	no biological data available	NM_001033350	GO:0005515	protein binding	inferred from physical interaction
TC0400000072.mm.1	32.92	0.000223	22.09	0.000449	28.82	0.00098		TC0400000072.mm.1			+		chr4	10136946 - 10138020	NonCoding		10136946	10138020	30			NONMMUT046150	NONCODE	Non-coding transcript identified by NONCODE: Linc	chr4	100	100	0		0
TC0400000383.mm.1	3.36	0.001517	3.47	0.013087	2.88	0.000714		TC0400000383.mm.1	Gm10601	predicted pseudogene 10601	+	ENSMUST00000120436	chr4	41809083 - 41810504	Pseudogene		41809083	41810504	30			ENSMUST00000120436	ENSEMBL	havana:known chromosome:GRCm38:4:41809083:41810504:1 gene:ENSMUSG00000082962 gene_biotype:pseudogene transcript_biotype:unprocessed_pseudogene	chr4	100	100	0		0
TC0400000384.mm.1	2.77	0.00454	2.68	0.030623	3.17	0.005955		TC0400000384.mm.1			+		chr4	41857757 - 41886063	Complex		41857757	41886063	60			uc029uqw.1	UCSC Genes	SubName: Full=4933409K07Rik protein; SubName: Full=Protein LOC101055653;	chr4	100	100	0		0
TC0400000385.mm.1	3.75	0.01504	2.98	0.011111	5.01	0.001286		TC0400000385.mm.1			+		chr4	41886578 - 41887367	Coding		41886578	41887367	30			uc029urg.1	UCSC Genes	SubName: Full=Putative uncharacterized protein; Flags: Fragment;	chr4	100	100	0		0
TC0400000386.mm.1	3.29	0.005275	3.42	0.004923	4.47	0.001799		TC0400000386.mm.1	Gm3893	predicted gene 3893	+	NR_033506	chr4	41889795 - 42235604	Complex		41889795	42235604	370	4 A5|4	100042539	NR_033506	RefSeq	Mus musculus predicted gene 3893 (Gm3893), long non-coding RNA.	chr4	100	100	0		0	NR_033506	Q6PCY5	NR_033506	Mm.418556	testis	ENSMUST00000169242	GO:0006955	immune response	inferred from electronic annotation	ENSMUST00000169242	GO:0005576	extracellular region	inferred from electronic annotation	ENSMUST00000169242	GO:0005125	cytokine activity	inferred from electronic annotation
TC0400000391.mm.1	2.56	0.001692	2.33	0.000663	2.6	0.004695		TC0400000391.mm.1	Gm20938	predicted gene, 20938	+	XM_001481239	chr4	41966058 - 41971856	Coding		41966058	41971856	50	4|4	100043920	XM_001481239	RefSeq	PREDICTED: Mus musculus predicted gene, 20938 (Gm20938), transcript variant X1, mRNA.	chr4	100	100	0		0	XM_001481239	A2APU8	ENSMUST00000108026	Mm.425173	bone marrow| brain| mammary gland| pancreas| testis| fetus| juvenile| adult					XM_001481239	GO:0016020	membrane	inferred from electronic annotation
TC0400000400.mm.1	3.91	0.001781	4.07	0.006859	4.82	0.004123		TC0400000400.mm.1	LOC101056185	protein FAM205A-like	+	ENSMUST00000165401	chr4	42236859 - 42240202	Complex		42236859	42240202	70		101056185	ENSMUST00000165401	ENSEMBL	havana:known chromosome:GRCm38:4:42236859:42239182:1 gene:ENSMUSG00000073879 gene_biotype:pseudogene transcript_biotype:unprocessed_pseudogene	chr4	100	100	0		0			ENSMUST00000165401	Mm.490618	brain
TC0400000405.mm.1	2.47	0.004972	2.12	0.000332	2.18	0.001738		TC0400000405.mm.1	Gm21598	predicted gene, 21598	+	XM_003688793	chr4	42318272 - 42324070	Coding		42318272	42324070	60	4|4	100862261	XM_003688793	RefSeq	PREDICTED: Mus musculus predicted gene, 21598 (Gm21598), transcript variant X1, mRNA.	chr4	100	100	0		0	XM_003688793	A2APU8	ENSMUST00000178192	Mm.425173	bone marrow| brain| mammary gland| pancreas| testis| fetus| juvenile| adult					XM_003688793	GO:0016020	membrane	inferred from electronic annotation
TC0400000406.mm.1	7.06	0.002614	5.77	0.014393	8	0.007488		TC0400000406.mm.1			+		chr4	42377654 - 42378337	NonCoding		42377654	42378337	30			NONMMUT046915	NONCODE	Non-coding transcript identified by NONCODE: Linc	chr4	100	100	0		0
TC0400000408.mm.1	8.85	0.015563	9.43	0.001801	10.21	0.002878		TC0400000408.mm.1			+		chr4	42466370 - 42466692	NonCoding		42466370	42466692	30			uc029uti.1	UCSC Genes	Mus musculus 10 days neonate cerebellum cDNA, RIKEN full-length enriched library, clone:B930035O06 product:unclassifiable, full insert sequence.	chr4	100	100	0		0
TC0400000409.mm.1	3.72	0.005476	3.47	0.005065	4.6	0.001679		TC0400000409.mm.1	Gm2163	predicted gene 2163	+	XR_140632	chr4	42466752 - 42590045	Complex		42466752	42590045	180	4 A5|4	100039331	XR_140632	RefSeq	[retired] PREDICTED: Mus musculus predicted gene 2163 (Gm2163), misc_RNA.	chr4	100	100	0		0	ENSMUST00000179734	Q6PCY5	ENSMUST00000178906	Mm.389551	bone marrow| liver| skin| testis| fetus| adult
TC0400000419.mm.1	2.33	0.001144	2.45	0.01288	2.98	0.003048		TC0400000419.mm.1	4930578G10Rik	RIKEN cDNA 4930578G10 gene	+	ENSMUST00000068158	chr4	42735545 - 42846261	Complex		42735545	42846261	80			ENSMUST00000068158	ENSEMBL	ensembl:known chromosome:GRCm38:4:42735545:42845996:1 gene:ENSMUSG00000054885 gene_biotype:protein_coding transcript_biotype:protein_coding	chr4	100	100	0		0	ENSMUST00000068158	Q9D4Q4				ENSMUST00000068158	GO:0008150	biological_process	no biological data available	ENSMUST00000068158	GO:0005575	cellular_component	no biological data available	ENSMUST00000068158	GO:0003674	molecular_function	no biological data available
TC0400000420.mm.1	3.39	0.004919	3.62	0.008897	5.26	0.007209		TC0400000420.mm.1	Gm12395	predicted gene 12395	+	ENSMUST00000144765	chr4	42736187 - 42739414	NonCoding		42736187	42739414	50			ENSMUST00000144765	ENSEMBL	havana:known chromosome:GRCm38:4:42736593:42738094:1 gene:ENSMUSG00000085910 gene_biotype:antisense transcript_biotype:antisense	chr4	100	100	0		0
TC0400000666.mm.1	3.73	0.013249	3.58	0.000248	2.53	0.016063		TC0400000666.mm.1	Mup-ps3	major urinary protein, pseudogene 3	+	ENSMUST00000178315	chr4	60237345 - 60244027	Complex		60237345	60244027	52			ENSMUST00000178315	ENSEMBL	havana:known chromosome:GRCm38:4:60237345:60244027:1 gene:ENSMUSG00000095455 gene_biotype:pseudogene transcript_biotype:unprocessed_pseudogene	chr4	100	100	0		0
TC0400000667.mm.1	2.03	0.013915	2.18	0.01254	2	0.036931		TC0400000667.mm.1	Gm14311	predicted gene 14311	+	ENSMUST00000119495	chr4	60361639 - 60361786	Pseudogene		60361639	60361786	30			ENSMUST00000119495	ENSEMBL	havana:known chromosome:GRCm38:4:60361639:60361786:1 gene:ENSMUSG00000082055 gene_biotype:pseudogene transcript_biotype:processed_pseudogene	chr4	100	100	0		0
TC0400000673.mm.1	2.8	0.025395	3.52	0.001261	2	0.023625		TC0400000673.mm.1	Gm13773	predicted gene 13773	+	ENSMUST00000156693	chr4	60502841 - 60521169	Complex		60502841	60521169	82			ENSMUST00000156693	ENSEMBL	havana:known chromosome:GRCm38:4:60502841:60521169:1 gene:ENSMUSG00000086253 gene_biotype:processed_transcript transcript_biotype:processed_transcript	chr4	100	100	0		0
TC0400000679.mm.1	2.64	0.013241	3.04	0.0011	2.23	0.031871		TC0400000679.mm.1	Gm21286	predicted gene, 21286	+	ENSMUST00000098035	chr4	60838256 - 60839649	Coding		60838256	60839649	32			ENSMUST00000098035	ENSEMBL	ensembl:known chromosome:GRCm38:4:60838256:60839649:1 gene:ENSMUSG00000094948 gene_biotype:protein_coding transcript_biotype:protein_coding	chr4	100	100	0		0	ENSMUST00000098035	J3QPA3				ENSMUST00000098035	GO:0006810	transport	inferred from electronic annotation					ENSMUST00000098035	GO:0005215	transporter activity	inferred from electronic annotation
TC0400000682.mm.1	3.73	0.013249	3.58	0.000248	2.53	0.016063		TC0400000682.mm.1	Mup-ps11	major urinary protein, pseudogene 11	+	ENSMUST00000178040	chr4	61318730 - 61325417	Complex		61318730	61325417	52			ENSMUST00000178040	ENSEMBL	havana:known chromosome:GRCm38:4:61318730:61325417:1 gene:ENSMUSG00000095978 gene_biotype:pseudogene transcript_biotype:unprocessed_pseudogene	chr4	100	100	0		0
TC0400000686.mm.1	3.62	0.013879	4.89	0.004148	2.21	0.011507		TC0400000686.mm.1	Mup-ps15	major urinary protein, pseudogene 15	+	ENSMUST00000121741	chr4	61698841 - 61701544	Complex		61698841	61701544	52			ENSMUST00000121741	ENSEMBL	havana:known chromosome:GRCm38:4:61698841:61701544:1 gene:ENSMUSG00000083304 gene_biotype:pseudogene transcript_biotype:unprocessed_pseudogene	chr4	100	100	0		0
TC0400001310.mm.1	22.86	9.7e-05	22.61	9.8e-05	8.44	0.011222		TC0400001310.mm.1			+		chr4	118546893 - 118549192	NonCoding		118546893	118549192	208
TC0400002192.mm.1	2715.7	6.9e-05	2818.56	5.4e-05	2492.12	0.000164		TC0400002192.mm.1			-		chr4	10136920 - 10138026	NonCoding		10136920	10138026	30			NONMMUT046149	NONCODE	Non-coding transcript identified by NONCODE: Linc	chr4	100	100	0		0
TC0400002482.mm.1	10.68	0.007335	6.35	0.004983	10.01	0.002911		TC0400002482.mm.1			-		chr4	41811350 - 41811775	NonCoding		41811350	41811775	30			NONMMUT046888	NONCODE	Non-coding transcript identified by NONCODE: Linc	chr4	100	100	0		0
TC0400002484.mm.1	4.18	0.009716	6.71	0.001814	4.49	0.003397		TC0400002484.mm.1	Gm5859	predicted pseudogene 5859	-	uc029urh.1	chr4	41889614 - 42092128	NonCoding		41889614	42092128	30	4 A5|4	545605	uc029urh.1	UCSC Genes	Mus musculus RNA for germline small RNA gsRNA34, complete sequence.	chr4	100	100	0		0
TC0400002485.mm.1	2.72	0.007964	2.81	0.009752	4.37	0.001818		TC0400002485.mm.1	Gm13307	predicted gene 13307	-	ENSMUST00000141375	chr4	41893278 - 41942092	NonCoding		41893278	41942092	70			ENSMUST00000141375	ENSEMBL	havana:known chromosome:GRCm38:4:41893278:41942092:-1 gene:ENSMUSG00000085730 gene_biotype:antisense transcript_biotype:antisense	chr4	100	100	0		0
TC0400002486.mm.1	4.02	0.002184	4.2	0.004993	3.72	0.001044		TC0400002486.mm.1	Gm13303	predicted gene 13303	-	ENSMUST00000117125	chr4	42025429 - 42026712	Pseudogene		42025429	42026712	30			ENSMUST00000117125	ENSEMBL	havana:known chromosome:GRCm38:4:42025429:42026712:-1 gene:ENSMUSG00000082414 gene_biotype:pseudogene transcript_biotype:unprocessed_pseudogene	chr4	100	100	0		0
TC0400002487.mm.1	7.67	0.014866	9.24	0.003932	11.91	0.003628		TC0400002487.mm.1			-		chr4	42027597 - 42027861	NonCoding		42027597	42027861	30			uc029urz.1	UCSC Genes	Mus musculus 10 days neonate cerebellum cDNA, RIKEN full-length enriched library, clone:B930035O06 product:unclassifiable, full insert sequence.	chr4	100	100	0		0
TC0400002491.mm.1	3.44	0.006266	3.45	0.007504	3.71	0.008614		TC0400002491.mm.1	Gm2172	predicted gene 2172	-	uc008sms.2	chr4	42087734 - 42247707	NonCoding		42087734	42247707	30	4 A5|4	100039344	uc008sms.2	UCSC Genes	Mus musculus adult male spinal cord cDNA, RIKEN full-length enriched library, clone:A330032A01 product:unclassifiable, full insert sequence.	chr4	100	100	0		0
TC0400002493.mm.1	3.3	0.001425	3.87	0.023737	5.32	0.005539		TC0400002493.mm.1	Gm13299	predicted gene 13299	-	ENSMUST00000133644	chr4	42121613 - 42153435	NonCoding		42121613	42153435	40			ENSMUST00000133644	ENSEMBL	havana:known chromosome:GRCm38:4:42121613:42153435:-1 gene:ENSMUSG00000087577 gene_biotype:antisense transcript_biotype:antisense	chr4	100	100	0		0
TC0400002497.mm.1	4.74	0.004767	3.83	0.00401	4.18	0.006722		TC0400002497.mm.1			-		chr4	42235985 - 42239287	NonCoding		42235985	42239287	30			NONMMUT046907	NONCODE	Non-coding transcript identified by NONCODE: Linc	chr4	100	100	0		0
TC0400002498.mm.1	3.57	0.011138	6.18	0.006749	6.11	0.00345		TC0400002498.mm.1	Gm21980	predicted gene 21980	-	ENSMUST00000180032	chr4	42293436 - 42293841	NonCoding		42293436	42293841	30			ENSMUST00000180032	ENSEMBL	havana:known chromosome:GRCm38:4:42293436:42293841:-1 gene:ENSMUSG00000096327 gene_biotype:lincRNA transcript_biotype:lincRNA	chr4	100	100	0		0
TC0400002499.mm.1	7.67	0.014866	9.24	0.003932	11.91	0.003628		TC0400002499.mm.1			-		chr4	42379808 - 42380072	NonCoding		42379808	42380072	30			uc029utb.1	UCSC Genes	Mus musculus 10 days neonate cerebellum cDNA, RIKEN full-length enriched library, clone:B930035O06 product:unclassifiable, full insert sequence.	chr4	100	100	0		0
TC0400002501.mm.1	2.47	0.004972	2.12	0.000332	2.18	0.001738		TC0400002501.mm.1	Gm13298	predicted gene 13298	-	NM_001085530	chr4	42522439 - 42528237	Coding		42522439	42528237	60	4 A5|4	545611	NM_001085530	RefSeq	Mus musculus predicted gene 13298 (Gm13298), mRNA.	chr4	100	100	0		0	NM_001085530	A2APU8	NM_001085530	Mm.425173	bone marrow| brain| mammary gland| pancreas| testis| fetus| juvenile| adult					NM_001085530	GO:0016020	membrane	inferred from electronic annotation
TC0400004210.mm.1	2.98	0.006667	3.39	0.004403	2	0.049933		TC0400004210.mm.1	Mup9	major urinary protein 9	-	NM_001126319	chr4	60218621 - 60421952	Complex		60218621	60421952	202	4 B3|4	100038948	NM_001126319	RefSeq	[retired] Mus musculus major urinary protein 9 (Mup9), mRNA.	chr4	100	100	0		0	NM_001134676	P11590	NM_001134676	Mm.457982	adrenal gland| brain| embryonic tissue| eye| intestine| kidney| liver| lung| lymph node| mammary gland| muscle| salivary gland| skin| stomach| tongue| organogenesis| fetus| juvenile| adult	NM_001134676	GO:0006112	energy reserve metabolic process	inferred from sequence or structural similarity	NM_001134676	GO:0005576	extracellular region	inferred from electronic annotation	NM_001134676	GO:0005009	insulin-activated receptor activity	inferred from sequence or structural similarity
TC0400002774.mm.1	3.65	0.026757	5.11	0.000859	2.63	0.01799		TC0400002774.mm.1	Mup-ps17	major urinary protein, pseudogene 17	-	ENSMUST00000120723	chr4	61857321 - 61857876	Complex		61857321	61857876	30			ENSMUST00000120723	ENSEMBL	havana:known chromosome:GRCm38:4:61857321:61857876:-1 gene:ENSMUSG00000081053 gene_biotype:pseudogene transcript_biotype:unprocessed_pseudogene	chr4	100	100	0		0
TC0400003198.mm.1	3.23	0.006776	4.14	0.003179	3.67	0.005351		TC0400003198.mm.1			-		chr4	106166294 - 106200450	NonCoding		106166294	106200450	50			NONMMUT048469	NONCODE	Non-coding transcript identified by NONCODE: Linc	chr4	100	100	0		0
TC0400003288.mm.1	2.44	0.006668	2.6	0.004478	2.71	0.011182		TC0400003288.mm.1	Gm12820	predicted gene 12820	-	ENSMUST00000119233	chr4	112121003 - 112121344	Complex		112121003	112121344	30			ENSMUST00000119233	ENSEMBL	havana:known chromosome:GRCm38:4:112121003:112121344:-1 gene:ENSMUSG00000084326 gene_biotype:pseudogene transcript_biotype:processed_pseudogene	chr4	100	100	0		0
TC0400003392.mm.1	5.57	0.02904	2.76	0.006647	8.94	0.033507		TC0400003392.mm.1	Mpl	myeloproliferative leukemia virus oncogene	-	NM_001122949	chr4	118442415 - 118457513	Coding		118442415	118457513	160	4 D|4 54.61 cM	17480	NM_001122949	RefSeq	Mus musculus myeloproliferative leukemia virus oncogene (Mpl), transcript variant 1, mRNA.	chr4	100	100	0		0	NM_001122949	Q08351	NM_001122949	Mm.4864	bone marrow| inner ear| mammary gland| spleen| adult	NM_001122949	GO:0032642	regulation of chemokine production	inferred from mutant phenotype	NM_001122949	GO:0005886	plasma membrane	not recorded	NM_001122949	GO:0004896	cytokine receptor activity	inferred from electronic annotation
TC0400003923.mm.1	5.51	0.01391	5.14	0.008516	8.01	0.026815		TC0400003923.mm.1	Gm13080	predicted gene 13080	-	ENSMUST00000120556	chr4	143611658 - 143612077	Complex		143611658	143612077	30			ENSMUST00000120556	ENSEMBL	havana:known chromosome:GRCm38:4:143611658:143612077:-1 gene:ENSMUSG00000044377 gene_biotype:pseudogene transcript_biotype:processed_pseudogene	chr4	100	100	0		0
TC0500000338.mm.1	4.7	0.013848	3.02	0.03092	3.74	0.045433		TC0500000338.mm.1	Gm5864	predicted gene 5864	+	ENSMUST00000182436	chr5	32420003 - 32420972	Pseudogene		32420003	32420972	30			ENSMUST00000182436	ENSEMBL	havana:known chromosome:GRCm38:5:32420003:32420972:1 gene:ENSMUSG00000097978 gene_biotype:pseudogene transcript_biotype:processed_pseudogene	chr5	100	100	0		0
TC0500000412.mm.1	53.31	0.000466	87.71	2.2e-05	24.88	0.003381		TC0500000412.mm.1			+		chr5	36660948 - 36661558	NonCoding		36660948	36661558	17			NONMMUT051994	NONCODE	Non-coding transcript identified by NONCODE: Antisense	chr5	100	100	0		0
TC0500002815.mm.1	3.89	0.010337	3.16	0.000457	4.16	0.029397		TC0500002815.mm.1	Gm3470	predicted gene 3470	-	XM_001477422	chr5	99021740 - 99022440	Pseudogene		99021740	99022440	30	5 E3|5	100041680	XM_001477422	RefSeq	PREDICTED: Mus musculus predicted gene 3470 (Gm3470), mRNA.	chr5	100	100	0		0
TC0500002843.mm.1	7.73	0.013016	3.21	0.008265	7.05	0.028475		TC0500002843.mm.1	Hpse	heparanase	-	NM_152803	chr5	100679484 - 100719716	Coding		100679484	100719716	140	5 E4|5	15442	NM_152803	RefSeq	Mus musculus heparanase (Hpse), mRNA.	chr5	100	100	0		0	NM_152803	Q6YGZ1	NM_152803	Mm.265786	bladder| blood| bone| bone marrow| brain| connective tissue| embryonic tissue| extraembryonic tissue| eye| fertilized ovum| inner ear| joint| liver| lung| lymph node| mammary gland| muscle| ovary| skin| spleen| thymus| thyroid| unfertilized ovum| zygote| fetus| neonate| juvenile| adult	NM_152803	GO:0005975	carbohydrate metabolic process	inferred from electronic annotation	NM_152803	GO:0005576	extracellular region	inferred from electronic annotation	NM_152803	GO:0016787	hydrolase activity	inferred from electronic annotation
TC0600000459.mm.1	2.71	0.038027	2.55	0.00162	2.57	0.019432		TC0600000459.mm.1	Zyx	zyxin	+	NM_001289617	chr6	42349828 - 42360213	Coding		42349828	42360213	170	6 B2.1|6	22793	NM_001289617	RefSeq	Mus musculus zyxin (Zyx), transcript variant 2, mRNA.	chr6	100	100	0		0	NM_001289617	Q62523	NM_001289617	Mm.282303	adipose tissue| bladder| blood| bone| bone marrow| brain| connective tissue| embryonic tissue| extraembryonic tissue| eye| heart| inner ear| intestine| joint| kidney| liver| lung| lymph node| mammary gland| muscle| nasopharynx| ovary| pancreas| salivary gland| skin| spleen| stomach| sympathetic ganglion| testis| thymus| thyroid| uterus| vesicular gland| morula| blastocyst| egg cylinder| gastrula|…	NM_001289617	GO:0007155	cell adhesion	inferred from electronic annotation	NM_001289617	GO:0001725	stress fiber	not recorded	NM_001289617	GO:0005515	protein binding	inferred from physical interaction	NM_001289617	GenMAPP
TC0600000724.mm.1	3.78	0.022692	2.34	0.008666	4.55	0.038564		TC0600000724.mm.1	Mmrn1	multimerin 1	+	NM_001163507	chr6	60924976 - 60989378	Complex		60924976	60989378	150	6 C1|6 29.22 cM	70945	NM_001163507	RefSeq	Mus musculus multimerin 1 (Mmrn1), transcript variant 2, mRNA.	chr6	100	100	0		0	NM_001163507	B2RPV6	NM_001163507	Mm.389770	bladder| bone| bone marrow| embryonic tissue| eye| inner ear| intestine| liver| lung| mammary gland| testis| thymus| organogenesis| fetus| adult	NM_001163507	GO:0008150	biological_process	no biological data available	NM_001163507	GO:0005576	extracellular region	inferred from electronic annotation	NM_001163507	GO:0003674	molecular_function	no biological data available
TC0600001524.mm.1	3.1	0.006233	3.38	0.000949	2.42	0.036046		TC0600001524.mm.1	BC064078	cDNA sequence BC064078	+	NR_015455	chr6	128992956 - 129008040	Complex		128992956	129008040	120	6 F3|6	408064	NR_015455	RefSeq	Mus musculus cDNA sequence BC064078 (BC064078), long non-coding RNA.	chr6	100	100	0		0			NR_015455	Mm.172429	embryonic tissue| intestine| kidney| lung| mammary gland| salivary gland| thymus| uterus| organogenesis| juvenile| adult
TC0600003119.mm.1	2.22	0.016284	2.33	0.003875	2.02	0.007498		TC0600003119.mm.1	Tpi1	triosephosphate isomerase 1	-	NM_009415	chr6	124810586 - 124814296	Complex		124810586	124814296	170	6 F2|6 59.17 cM	21991	NM_009415	RefSeq	Mus musculus triosephosphate isomerase 1 (Tpi1), mRNA.	chr6	100	100	0		0	NM_009415	P17751	NM_009415	Mm.4222	adipose tissue| adrenal gland| bladder| blood| bone| bone marrow| brain| connective tissue| dorsal root ganglion| embryonic tissue| extraembryonic tissue| eye| fertilized ovum| heart| inner ear| intestine| joint| kidney| liver| lung| mammary gland| molar| muscle| nasopharynx| ovary| pancreas| pineal gland| pituitary gland| prostate| salivary gland| skin| spinal cord| spleen| stomach| testis| thym…	NM_009415	GO:0006006	glucose metabolic process	inferred from direct assay	NM_009415	GO:0005615	extracellular space	not recorded	NM_009415	GO:0003824	catalytic activity	inferred from electronic annotation	NM_009415	GenMAPP
TC0600003610.mm.1	2.62	0.005699	3.49	0.00026	3.35	2e-06		TC0600003610.mm.1	Klra8	killer cell lectin-like receptor, subfamily A, member 8	-	NM_001101620	chr6	130082711 - 130162612	Complex		130082711	130162612	245	6 F3|6 63.44 cM	16639	NM_001101620	RefSeq	Mus musculus killer cell lectin-like receptor, subfamily A, member 8 (Klra8), transcript variant 1, mRNA.	chr6	100	100	0		0	NM_001101620	Q60682	NM_001101620	Mm.439698	mammary gland| oviduct| spleen| juvenile| adult	NM_001101620	GO:0007155	cell adhesion	inferred from electronic annotation	NM_001101620	GO:0005886	plasma membrane	traceable author statement	NM_001101620	GO:0030246	carbohydrate binding	inferred from electronic annotation
TC0600003611.mm.1	2.58	0.02546	2.76	0.00038	2.65	0.000241		TC0600003611.mm.1	Klra9	killer cell lectin-like receptor subfamily A, member 9	-	NM_010651	chr6	130178682 - 130193112	Coding		130178682	130193112	100	6 F3|6 63.44 cM	16640	NM_010651	RefSeq	Mus musculus killer cell lectin-like receptor subfamily A, member 9 (Klra9), mRNA.	chr6	100	100	0		0	NM_010651	Q64329	NM_010651	Mm.457996	thymus| juvenile	NM_010651	GO:0007155	cell adhesion	inferred from electronic annotation	NM_010651	GO:0005886	plasma membrane	traceable author statement	NM_010651	GO:0030246	carbohydrate binding	inferred from electronic annotation
TC0600003612.mm.1	2.49	0.01468	3.5	0.000481	4.07	0.001093		TC0600003612.mm.1	Klra10	killer cell lectin-like receptor subfamily A, member 10	-	NM_008459	chr6	130269194 - 130281928	Coding		130269194	130281928	60	6 F3|6 63.44 cM	16628	NM_008459	RefSeq	Mus musculus killer cell lectin-like receptor subfamily A, member 10 (Klra10), mRNA.	chr6	100	100	0		0	NM_008459	Q9R1G6	NM_008459	Mm.445916						NM_008459	GO:0005886	plasma membrane	traceable author statement	NM_008459	GO:0030246	carbohydrate binding	inferred from electronic annotation
TC0700001557.mm.1	3.35	0.030307	2.13	0.002317	3.32	0.040452		TC0700001557.mm.1	Ilk	integrin linked kinase	+	NM_001161724	chr7	105736590 - 105742925	Complex		105736590	105742925	243	7|7 E1	16202	NM_001161724	RefSeq	Mus musculus integrin linked kinase (Ilk), transcript variant 1, mRNA.	chr7	100	100	0		0	NM_001161724	O55222	NM_001161724	Mm.274846	bladder| bone| bone marrow| brain| connective tissue| embryonic tissue| extraembryonic tissue| eye| heart| inner ear| intestine| joint| kidney| liver| lung| lymph node| mammary gland| molar| muscle| nasopharynx| ovary| pancreas| pituitary gland| prostate| salivary gland| skin| spinal cord| spleen| stomach| sympathetic ganglion| testis| thymus| gastrula| organogenesis| fetus| neonate| juvenile| ad…													NM_001161724	GenMAPP
TC0700002055.mm.1	3.69	0.029047	3.27	0.000719	7.97	0.036404		TC0700002055.mm.1	Cd151	CD151 antigen	+	NM_001111049	chr7	141467362 - 141471481	Coding		141467362	141471481	106	7 F5|7 86.82 cM	12476	NM_001111049	RefSeq	Mus musculus CD151 antigen (Cd151), transcript variant 2, mRNA.	chr7	100	100	0		0	NM_001111049	O35566	NM_001111049	Mm.30246	adrenal gland| bladder| blood| bone| bone marrow| brain| connective tissue| embryonic tissue| epididymis| extraembryonic tissue| eye| fertilized ovum| heart| inner ear| intestine| kidney| liver| lung| lymph node| mammary gland| muscle| nasopharynx| ovary| oviduct| pancreas| prostate| salivary gland| skin| spinal cord| spleen| stomach| sympathetic ganglion| testis| thymus| thyroid| uterus| vagina|…	NM_001111049	GO:0016477	cell migration	inferred from mutant phenotype	NM_001111049	GO:0016020	membrane	inferred from electronic annotation	ENSMUST00000106000	GO:0005515	protein binding	inferred from electronic annotation
TC0700002511.mm.1	2.06	0.031499	2.69	0.024818	2.22	0.047769		TC0700002511.mm.1	Gm16442	predicted gene 16442	-	NM_001167148	chr7	20121656 - 20122579	Complex		20121656	20122579	30	7 A3|7	620401	NM_001167148	RefSeq	Mus musculus predicted gene 16442 (Gm16442), mRNA.	chr7	100	100	0		0	NM_001167148	D3YZG3	NM_001167148	Mm.484999		NM_001167148	GO:0007186	G-protein coupled receptor signaling pathway	inferred from electronic annotation	NM_001167148	GO:0016021	integral component of membrane	inferred from electronic annotation	NM_001167148	GO:0016503	pheromone receptor activity	inferred from electronic annotation
TC0700002518.mm.1	2.88	0.024059	3.09	0.028179	3	0.037449		TC0700002518.mm.1	Vmn1r-ps79	vomeronasal 1 receptor, pseudogene 79	-	NR_030707	chr7	20356626 - 20358918	Complex		20356626	20358918	60	7 A3|7	100042966	NR_030707	RefSeq	Mus musculus vomeronasal 1 receptor, pseudogene 79 (Vmn1r-ps79), non-coding RNA.	chr7	100	100	0		0	NR_030707	Q0VDV9	NR_030707	Mm.431911		NR_030707	GO:0007186	G-protein coupled receptor signaling pathway	inferred from electronic annotation	NR_030707	GO:0016021	integral component of membrane	inferred from electronic annotation	NR_030707	GO:0016503	pheromone receptor activity	inferred from electronic annotation
TC0700002519.mm.1	3.75	0.022103	3.92	0.002853	3.1	0.016972		TC0700002519.mm.1	Gm5728	predicted gene 5728	-	NM_001166713	chr7	20374493 - 20375410	Coding		20374493	20375410	30	7 A3|7	435949	NM_001166713	RefSeq	Mus musculus predicted gene 5728 (Gm5728), mRNA.	chr7	100	100	0		0	NM_001166713	K7N6J2	NM_001166713	Mm.485000		NM_001166713	GO:0007165	signal transduction	inferred from electronic annotation	NM_001166713	GO:0016020	membrane	inferred from electronic annotation	NM_001166713	GO:0004871	signal transducer activity	inferred from electronic annotation
TC0700002521.mm.1	3.98	0.021924	3.1	0.04087	4.56	0.014943		TC0700002521.mm.1	Gm10665	predicted gene 10665	-	NM_001167160	chr7	20473960 - 20474925	Coding		20473960	20474925	30	7 A3|7	100043058	NM_001167160	RefSeq	Mus musculus predicted gene 10665 (Gm10665), mRNA.	chr7	100	100	0		0	NM_001167160	K7N6B7	NM_001167160	Mm.484986		NM_001167160	GO:0007186	G-protein coupled receptor signaling pathway	inferred from electronic annotation	NM_001167160	GO:0016021	integral component of membrane	inferred from electronic annotation	NM_001167160	GO:0016503	pheromone receptor activity	inferred from electronic annotation
TC0700002528.mm.1	3.78	0.015664	3.04	0.043683	3.19	0.031771		TC0700002528.mm.1	Vmn1r114	vomeronasal 1 receptor 114	-	NM_001166837	chr7	20811221 - 20812186	Coding		20811221	20812186	30	7 A3|7	100042996	NM_001166837	RefSeq	Mus musculus vomeronasal 1 receptor 114 (Vmn1r114), mRNA.	chr7	100	100	0		0	NM_001166837	L7N226	NM_001166837	Mm.480291		NM_001166837	GO:0007165	signal transduction	inferred from electronic annotation	NM_001166837	GO:0016020	membrane	inferred from electronic annotation	NM_001166837	GO:0004871	signal transducer activity	inferred from electronic annotation
TC0700002533.mm.1	3.27	0.032866	3.01	0.026069	4.3	0.015531		TC0700002533.mm.1	Vmn1r-ps79	vomeronasal 1 receptor, pseudogene 79	-	ENSMUST00000173130	chr7	21035174 - 21037293	Complex		21035174	21037293	30	7 A3|7	100042966	ENSMUST00000173130	ENSEMBL	havana:known chromosome:GRCm38:7:21035174:21037293:-1 gene:ENSMUSG00000094501 gene_biotype:pseudogene transcript_biotype:unprocessed_pseudogene	chr7	100	100	0		0	ENSMUST00000173130	Q0VDV9	ENSMUST00000173130	Mm.431911		ENSMUST00000173130	GO:0007186	G-protein coupled receptor signaling pathway	inferred from electronic annotation	ENSMUST00000173130	GO:0016021	integral component of membrane	inferred from electronic annotation	ENSMUST00000173130	GO:0016503	pheromone receptor activity	inferred from electronic annotation
TC0700002538.mm.1	3.77	0.029096	3.27	0.032546	2.87	0.032605		TC0700002538.mm.1	Vmn1r126	vomeronasal 1 receptor 126	-	NM_001166838	chr7	21300502 - 21301467	Coding		21300502	21301467	30	7 A3|7	100043013	NM_001166838	RefSeq	Mus musculus vomeronasal 1 receptor 126 (Vmn1r126), mRNA.	chr7	100	100	0		0	NM_001166838	L7N2C8	NM_001166838	Mm.480289		NM_001166838	GO:0007186	G-protein coupled receptor signaling pathway	inferred from electronic annotation	NM_001166838	GO:0005575	cellular_component	no biological data available	NM_001166838	GO:0003674	molecular_function	no biological data available
TC0700002545.mm.1	3.77	0.029096	3.27	0.032546	2.87	0.032605		TC0700002545.mm.1	Gm4214	predicted gene 4214	-	NM_001167164	chr7	21760531 - 21761475	Coding		21760531	21761475	30	7 A3|7	100043079	NM_001167164	RefSeq	Mus musculus predicted gene 4214 (Gm4214), mRNA.	chr7	100	100	0		0	NM_001167164	D3YTW8	NM_001167164	Mm.482051		NM_001167164	GO:0007165	signal transduction	inferred from electronic annotation	NM_001167164	GO:0016020	membrane	inferred from electronic annotation	NM_001167164	GO:0004871	signal transducer activity	inferred from electronic annotation
TC0700002547.mm.1	3.26	0.044686	3.16	0.007972	2.12	0.025349		TC0700002547.mm.1	Gm4216	predicted gene 4216	-	NM_001167166	chr7	21795811 - 21796728	Coding		21795811	21796728	30	7 A3|7	100043083	NM_001167166	RefSeq	Mus musculus predicted gene 4216 (Gm4216), mRNA.	chr7	100	100	0		0	NM_001167166	D3YTX5	NM_001167166	Mm.484988		NM_001167166	GO:0007165	signal transduction	inferred from electronic annotation	NM_001167166	GO:0016020	membrane	inferred from electronic annotation	NM_001167166	GO:0004871	signal transducer activity	inferred from electronic annotation
TC0700002554.mm.1	3.69	0.01077	2.59	0.020996	2.88	0.031131		TC0700002554.mm.1	Gm16442	predicted gene 16442	-	NM_001167148	chr7	22117322 - 22118245	Complex		22117322	22118245	36	7 A3|7	620401	NM_001167148	RefSeq	Mus musculus predicted gene 16442 (Gm16442), mRNA.	chr7	100	100	0		0	NM_001167148	D3YZG3	NM_001167148	Mm.484999		NM_001167148	GO:0007186	G-protein coupled receptor signaling pathway	inferred from electronic annotation	NM_001167148	GO:0016021	integral component of membrane	inferred from electronic annotation	NM_001167148	GO:0016503	pheromone receptor activity	inferred from electronic annotation
TC0700002562.mm.1	3.75	0.022103	3.92	0.002853	3.1	0.016972		TC0700002562.mm.1	Gm5728	predicted gene 5728	-	NM_001166713	chr7	22370122 - 22371039	Coding		22370122	22371039	30	7 A3|7	435949	NM_001166713	RefSeq	Mus musculus predicted gene 5728 (Gm5728), mRNA.	chr7	100	100	0		0	NM_001166713	K7N6J2	NM_001166713	Mm.485000		NM_001166713	GO:0007165	signal transduction	inferred from electronic annotation	NM_001166713	GO:0016020	membrane	inferred from electronic annotation	NM_001166713	GO:0004871	signal transducer activity	inferred from electronic annotation
TC0700002564.mm.1	3.98	0.021924	3.1	0.04087	4.56	0.014943		TC0700002564.mm.1	Gm10665	predicted gene 10665	-	NM_001167160	chr7	22463110 - 22464075	Coding		22463110	22464075	30	7 A3|7	100043058	NM_001167160	RefSeq	Mus musculus predicted gene 10665 (Gm10665), mRNA.	chr7	100	100	0		0	NM_001167160	K7N6B7	NM_001167160	Mm.484986		NM_001167160	GO:0007186	G-protein coupled receptor signaling pathway	inferred from electronic annotation	NM_001167160	GO:0016021	integral component of membrane	inferred from electronic annotation	NM_001167160	GO:0016503	pheromone receptor activity	inferred from electronic annotation
TC0700002574.mm.1	3.77	0.029096	3.27	0.032546	2.87	0.032605		TC0700002574.mm.1	Gm4214	predicted gene 4214	-	NM_001167164	chr7	22983714 - 22984673	Coding		22983714	22984673	30	7 A3|7	100043079	NM_001167164	RefSeq	Mus musculus predicted gene 4214 (Gm4214), mRNA.	chr7	100	100	0		0	NM_001167164	D3YTW8	NM_001167164	Mm.482051		NM_001167164	GO:0007165	signal transduction	inferred from electronic annotation	NM_001167164	GO:0016020	membrane	inferred from electronic annotation	NM_001167164	GO:0004871	signal transducer activity	inferred from electronic annotation
TC0700002576.mm.1	3.26	0.044686	3.16	0.007972	2.12	0.025349		TC0700002576.mm.1	Gm4216	predicted gene 4216	-	NM_001167166	chr7	23019006 - 23019923	Coding		23019006	23019923	30	7 A3|7	100043083	NM_001167166	RefSeq	Mus musculus predicted gene 4216 (Gm4216), mRNA.	chr7	100	100	0		0	NM_001167166	D3YTX5	NM_001167166	Mm.484988		NM_001167166	GO:0007165	signal transduction	inferred from electronic annotation	NM_001167166	GO:0016020	membrane	inferred from electronic annotation	NM_001167166	GO:0004871	signal transducer activity	inferred from electronic annotation
TC0700002588.mm.1	4	0.023535	2.25	0.005305	3.4	0.029014		TC0700002588.mm.1	Atp5g2	ATP synthase, H+ transporting, mitochondrial F0 complex, subunit C2 (subunit 9)	-	ENSMUST00000086013	chr7	23946649 - 23947237	Coding		23946649	23947237	30	15 F3|15	67942	ENSMUST00000086013	ENSEMBL	ensembl:known chromosome:GRCm38:7:23946649:23947237:-1 gene:ENSMUSG00000066724 gene_biotype:protein_coding transcript_biotype:protein_coding	chr7	100	100	0		0	ENSMUST00000086013	P56383	ENSMUST00000086013	Mm.10314	adipose tissue| blood| bone| bone marrow| brain| embryonic tissue| extraembryonic tissue| eye| heart| inner ear| intestine| joint| kidney| liver| lung| mammary gland| muscle| ovary| pancreas| pituitary gland| salivary gland| skin| spleen| stomach| testis| thymus| thyroid|oocyte| morula| blastocyst| organogenesis| fetus| neonate| juvenile| adult	ENSMUST00000086013	GO:0015986	ATP synthesis coupled proton transport	inferred from electronic annotation	ENSMUST00000086013	GO:0005739	mitochondrion	inferred from direct assay	ENSMUST00000086013	GO:0008289	lipid binding	inferred from electronic annotation	ENSMUST00000086013	GenMAPP
TC0700003935.mm.1	5.16	0.000351	4.17	0.004139	3.33	0.002737		TC0700003935.mm.1	Gm15135	predicted gene 15135	-	ENSMUST00000149813	chr7	104261465 - 104262174	NonCoding		104261465	104262174	28			ENSMUST00000149813	ENSEMBL	havana:known chromosome:GRCm38:7:104261465:104262174:-1 gene:ENSMUSG00000086886 gene_biotype:antisense transcript_biotype:antisense	chr7	100	100	0		0	ENSMUST00000149813	Q99PP6	ENSMUST00000149813	Mm.466603	embryonic tissue					ENSMUST00000149813	GO:0005622	intracellular	inferred from electronic annotation	ENSMUST00000149813	GO:0008270	zinc ion binding	inferred from electronic annotation
TC0700003938.mm.1	5.67	0.008102	3.28	6.8e-05	3.23	0.002655		TC0700003938.mm.1	Trim12a	tripartite motif-containing 12A	-	NM_023835	chr7	104299894 - 104315495	Complex		104299894	104315495	166	7 E3|7	76681	NM_023835	RefSeq	Mus musculus tripartite motif-containing 12A (Trim12a), mRNA.	chr7	100	100	0		0	NM_023835	Q99PQ1	NM_023835	Mm.458309	adrenal gland| bone marrow| embryonic tissue| eye| intestine| kidney| liver| lung| prostate| spleen| thymus| tongue| egg cylinder| gastrula| organogenesis| fetus| neonate| juvenile| adult	NM_023835	GO:0008150	biological_process	no biological data available	NM_023835	GO:0005622	intracellular	inferred from electronic annotation	NM_023835	GO:0008270	zinc ion binding	inferred from electronic annotation
TC0700003939.mm.1	4.91	0.015963	3.84	0.022068	3.69	0.01997		TC0700003939.mm.1			-		chr7	104310509 - 104311058	NonCoding		104310509	104311058	30			NONMMUT063072	NONCODE	Non-coding transcript identified by NONCODE: Sense No Exonic	chr7	100	100	0		0
TC0700004011.mm.1	5.3	0.00555	3.11	0.002308	2.7	0.021244		TC0700004011.mm.1	Gm1966	predicted gene 1966	-	NM_001277179	chr7	106595549 - 106644645	Complex		106595549	106644645	90	7 E3|7	434223	NM_001277179	RefSeq	Mus musculus predicted gene 1966 (Gm1966), transcript variant 1, mRNA.	chr7	100	100	0		0	NM_001277179	Q3TA32	NM_001277179	Mm.334112	bone marrow| mammary gland| skin| spleen| juvenile| adult	NM_001277179	GO:0008150	biological_process	no biological data available	NM_001277179	GO:0005575	cellular_component	no biological data available	NM_001277179	GO:0003674	molecular_function	no biological data available
TC0700004045.mm.1	2.93	0.006652	3.7	0.000891	2.53	0.002484		TC0700004045.mm.1	Gm4199	predicted gene 4199	-	XM_001478802	chr7	108094129 - 108094485	Coding		108094129	108094485	30	7 E3|7	100043059	XM_001478802	RefSeq	PREDICTED: Mus musculus predicted gene 4199 (Gm4199), mRNA.	chr7	100	100	0		0
TC0800000234.mm.1	3.26	0.011722	2.84	0.000378	2.91	0.004024		TC0800000234.mm.1	Defa2	defensin, alpha, 2	+	NM_001195634	chr8	21378517 - 21379495	Complex		21378517	21379495	40	8|8	100294660	NM_001195634	RefSeq	Mus musculus defensin, alpha, 2 (Defa2), mRNA.	chr8	100	100	0		0	NM_001195634	P11477	NM_001195634	Mm.425522	intestine| pancreas| juvenile| adult	NM_001195634	GO:0042493	response to drug	inferred from direct assay	NM_001195634	GO:0005615	extracellular space	inferred from direct assay
TC0800000235.mm.1	2.46	0.005888	2.54	0.000806	2.89	0.002973		TC0800000235.mm.1	Gm21002	predicted gene, 21002	+	NM_001270555	chr8	21391811 - 21418321	Complex		21391811	21418321	50	8|8	100505096	NM_001270555	RefSeq	Mus musculus predicted gene, 21002 (Gm21002), mRNA.	chr8	100	100	0		0	NM_001270555	Q45VN2	NM_001270555	Mm.423382	intestine| adult	NM_001270555	GO:0006952	defense response	inferred from electronic annotation	NM_001270555	GO:0005576	extracellular region	inferred from electronic annotation
TC0800000242.mm.1	2.86	0.005968	3.03	0.000385	3.82	0.00265		TC0800000242.mm.1	Defa20	defensin, alpha, 20	+	NM_183268	chr8	21509256 - 21510237	Coding		21509256	21510237	40	8 A2|8	68009	NM_183268	RefSeq	Mus musculus defensin, alpha, 20 (Defa20), mRNA.	chr8	100	100	0		0	NM_183268	Q45VN2	NM_183268	Mm.327348	intestine| pancreas| prostate| juvenile| adult	NM_183268	GO:0019731	antibacterial humoral response	inferred from direct assay	NM_183268	GO:0005615	extracellular space	inferred from direct assay
TC0800000243.mm.1	3.08	0.004334	2.87	0.000565	3.41	0.005303		TC0800000243.mm.1	Gm15308	predicted gene 15308	+	NM_001177521	chr8	21529030 - 21530012	Coding		21529030	21530012	40	8 A2|8	100041890	NM_001177521	RefSeq	Mus musculus predicted gene 15308 (Gm15308), mRNA.	chr8	100	100	0		0	NM_001177521	Q45VN2	NM_001177521	Mm.423382	intestine| adult	NM_001177521	GO:0006952	defense response	inferred from electronic annotation	NM_001177521	GO:0005576	extracellular region	inferred from electronic annotation
TC0800000606.mm.1	4.59	0.014893	2.93	0.003723	3.29	0.013933		TC0800000606.mm.1			+		chr8	55348668 - 55351019	Coding		55348668	55351019	30			XM_003688852	MGI/Jackson Lab	[retired] PREDICTED: predicted gene 10674 (Gm10674), mRNA.	chr8	100	100	0		0
TC0800000982.mm.1	12.58	2.1e-05	7.19	0.000166	15.92	3.5e-05		TC0800000982.mm.1	Wdr83os	WD repeat domain 83 opposite strand	+	NM_001001493	chr8	85080740 - 85082339	Complex		85080740	85082339	70	8 C3|8	414077	NM_001001493	RefSeq	Mus musculus WD repeat domain 83 opposite strand (Wdr83os), mRNA.	chr8	100	100	0		0	NM_001001493	Q6ZWX0	NM_001001493	Mm.35790	adipose tissue| blood| bone marrow| brain| embryonic tissue| epididymis| extraembryonic tissue| eye| heart| inner ear| intestine| joint| kidney| liver| lung| lymph node| mammary gland| muscle| ovary| pancreas| prostate| skin| spinal cord| stomach| testis| thymus| thyroid| tongue|oocyte| unfertilized ovum| blastocyst| egg cylinder| gastrula| organogenesis| fetus| neonate| juvenile| adult	NM_001001493	GO:0008150	biological_process	no biological data available	NM_001001493	GO:0016020	membrane	inferred from electronic annotation	NM_001001493	GO:0003674	molecular_function	no biological data available
TC0800002053.mm.1	2.57	0.006277	3.64	0.002098	2.63	0.00458		TC0800002053.mm.1			-		chr8	35578979 - 35580074	NonCoding		35578979	35580074	30			KnowTID_00007220	Luo lincRNA	Non-coding transcript identified by Luo, et al.	chr8	100	100	0		0
TC0800002121.mm.1	2.77	0.002702	2.37	0.010404	2.36	0.046002		TC0800002121.mm.1	Frg1	FSHD region gene 1	-	NM_013522	chr8	41397454 - 41417118	Coding		41397454	41417118	100	8 A4|8 23.89 cM	14300	NM_013522	RefSeq	Mus musculus FSHD region gene 1 (Frg1), mRNA.	chr8	100	100	0		0	NM_013522	P97376	NM_013522	Mm.217312	bladder| blood| bone marrow| brain| connective tissue| embryonic tissue| extraembryonic tissue| eye| heart| intestine| liver| lung| lymph node| mammary gland| muscle| ovary| pancreas| prostate| spleen| testis| thymus| tongue| cleavage| blastocyst| gastrula| organogenesis| fetus| neonate| juvenile| adult	NM_013522	GO:0006364	rRNA processing	inferred from electronic annotation	NM_013522	GO:0005634	nucleus	inferred from electronic annotation	NM_013522	GO:0044822	poly(A) RNA binding	not recorded
TC0900000327.mm.1	12.58	0.00209	5.41	0.000826	11.66	0.000588		TC0900000327.mm.1			+		chr9	35071272 - 35080404	NonCoding		35071272	35080404	30			uc009osn.1	UCSC Genes	Mus musculus 16 days neonate thymus cDNA, RIKEN full-length enriched library, clone:A130069A15 product:unclassifiable, full insert sequence.	chr9	100	100	0		0
TC0900000512.mm.1	3.19	0.005724	3.94	0.000527	2.77	0.002423		TC0900000512.mm.1	Gm4199	predicted gene 4199	+	ENSMUST00000178509	chr9	44464243 - 44464602	Coding		44464243	44464602	30	7 E3|7	100043059	ENSMUST00000178509	ENSEMBL	ensembl:known chromosome:GRCm38:9:44464243:44464602:1 gene:ENSMUSG00000094437 gene_biotype:protein_coding transcript_biotype:protein_coding	chr9	100	100	0		0	ENSMUST00000178509	Q9CQY2	ENSMUST00000178509	Mm.241472	bone| bone marrow| brain| connective tissue| embryonic tissue| extraembryonic tissue| eye| fertilized ovum| heart| inner ear| intestine| kidney| liver| lung| lymph node| mammary gland| ovary| pancreas| pineal gland| pituitary gland| prostate| skin| spinal cord| spleen| stomach| sympathetic ganglion| testis| thymus|oocyte| unfertilized ovum| zygote| cleavage| morula| blastocyst| egg cylinder| gast…	ENSMUST00000178509	GO:0006370	7-methylguanosine mRNA capping	not recorded	ENSMUST00000178509	GO:0005634	nucleus	not recorded	ENSMUST00000178509	GO:0003723	RNA binding	not recorded
TC0900000848.mm.1	5.26	0.011459	3.36	0.000903	6.28	0.020364		TC0900000848.mm.1	Rbpms2	RNA binding protein with multiple splicing 2	+	NM_028030	chr9	65629648 - 65660528	Coding		65629648	65660528	110	9 C|9	71973	NM_028030	RefSeq	Mus musculus RNA binding protein with multiple splicing 2 (Rbpms2), mRNA.	chr9	100	100	0		0	NM_028030	Q8VC52	NM_028030	Mm.29148	adrenal gland| bladder| bone| bone marrow| brain| embryonic tissue| eye| fertilized ovum| heart| inner ear| intestine| joint| kidney| liver| lung| mammary gland| muscle| ovary| prostate| salivary gland| skin| spleen| testis| thyroid|oocyte| unfertilized ovum| zygote| cleavage| blastocyst| egg cylinder| gastrula| organogenesis| fetus| neonate| juvenile| adult	NM_028030	GO:0008150	biological_process	no biological data available	NM_028030	GO:0005575	cellular_component	no biological data available	NM_028030	GO:0000166	nucleotide binding	inferred from electronic annotation	NM_028030	GenMAPP
TC0900000863.mm.1	3.56	0.024756	2.34	0.000118	2.03	0.025886		TC0900000863.mm.1	Fam96a	family with sequence similarity 96, member A	+	NM_026635	chr9	66126611 - 66138968	Complex		66126611	66138968	70	9|9 D	68250	NM_026635	RefSeq	Mus musculus family with sequence similarity 96, member A (Fam96a), mRNA.	chr9	100	100	0		0	NM_026635	Q9DCL2	NM_026635	Mm.27107	adrenal gland| bladder| blood| bone| bone marrow| brain| embryonic tissue| extraembryonic tissue| eye| heart| inner ear| intestine| kidney| liver| lung| lymph node| mammary gland| muscle| pancreas| pituitary gland| prostate| skin| spinal cord| spleen| stomach| sympathetic ganglion| testis| thymus| tongue| uterus| morula| blastocyst| egg cylinder| gastrula| organogenesis| fetus| neonate| juvenile|…	NM_026635	GO:0007059	chromosome segregation	inferred from electronic annotation	NM_026635	GO:0005634	nucleus	not recorded	NM_026635	GO:0046872	metal ion binding	inferred from electronic annotation
TC0900001361.mm.1	2.39	0.012282	2.2	0.001642	2.41	0.047815		TC0900001361.mm.1	Gm17117	predicted gene 17117	+	ENSMUST00000163665	chr9	107115074 - 107115372	Complex		107115074	107115372	30			ENSMUST00000163665	ENSEMBL	havana:known chromosome:GRCm38:9:107115074:107115372:1 gene:ENSMUSG00000091669 gene_biotype:pseudogene transcript_biotype:processed_pseudogene	chr9	100	100	0		0
TC0900002004.mm.1	37.88	0.002403	10.74	1.7e-05	20.76	0.000414		TC0900002004.mm.1			-		chr9	35073787 - 35075506	NonCoding		35073787	35075506	30			NONMMUT068559	NONCODE	Non-coding transcript identified by NONCODE: Sense No Exonic	chr9	100	100	0		0
TC0900002005.mm.1	15.21	0.005035	9.38	0.000359	15.65	0.000144		TC0900002005.mm.1			-		chr9	35079772 - 35087806	NonCoding		35079772	35087806	30			NONMMUT068561	NONCODE	Non-coding transcript identified by NONCODE: Sense No Exonic	chr9	100	100	0		0
TC0900002006.mm.1	14.29	0.00476	4.81	0.000142	9.78	0.000411		TC0900002006.mm.1			-		chr9	35089719 - 35091455	NonCoding		35089719	35091455	30			NONMMUT068562	NONCODE	Non-coding transcript identified by NONCODE: Sense No Exonic	chr9	100	100	0		0
TC0900002719.mm.1	2.89	0.005646	2.12	0.00011	2.08	0.033758		TC0900002719.mm.1	Gsta2	glutathione S-transferase, alpha 2 (Yc2)	-	NM_008182	chr9	78331018 - 78355788	Complex		78331018	78355788	110	9 E1|9 43.65 cM	14858	NM_008182	RefSeq	Mus musculus glutathione S-transferase, alpha 2 (Yc2) (Gsta2), mRNA.	chr9	100	100	0		0	NM_008182	P10648	NM_008182	Mm.422778	blood| eye| kidney| liver| prostate| skin| testis| tongue| juvenile| adult	NM_008182	GO:0008152	metabolic process	inferred from electronic annotation					NM_008182	GO:0004364	glutathione transferase activity	inferred from electronic annotation
TC0X00001209.mm.1	2.06	0.018914	2.08	0.000233	2.03	0.00394		TC0X00001209.mm.1			+		chrX	123582175 - 123584229	NonCoding		123582175	123584229	30			KnowTID_00007956	Luo lincRNA	Non-coding transcript identified by Luo, et al.	chrX	100	100	0		0
TC0X00001239.mm.1	9.61	0.03818	8.25	0.001474	9.42	0.011173		TC0X00001239.mm.1			+		chrX	126774712 - 126778100	NonCoding		126774712	126778100	30			NONMMUT073822	NONCODE	Non-coding transcript identified by NONCODE: Linc	chrX	100	100	0		0
TC0X00001684.mm.1	2.85	0.015023	2.62	0.001797	3.37	0.011884		TC0X00001684.mm.1	Trappc2	trafficking protein particle complex 2	+	NM_025432	chrX	166440574 - 166453140	Complex		166440574	166453140	105	X F5|X	66226	NM_025432	RefSeq	Mus musculus trafficking protein particle complex 2 (Trappc2), mRNA.	chrX	100	100	0		0	NM_025432	Q9CQP2	NM_025432	Mm.279752	blood| bone marrow| brain| dorsal root ganglion| embryonic tissue| extraembryonic tissue| eye| fertilized ovum| heart| intestine| kidney| mammary gland| ovary| pancreas| pituitary gland| prostate| salivary gland| skin| spinal cord| stomach| testis| thymus|oocyte| zygote| organogenesis| fetus| neonate| juvenile| adult	NM_025432	GO:0001501	skeletal system development	not recorded	NM_025432	GO:0030008	TRAPP complex	inferred from direct assay	NM_025432	GO:0005515	protein binding	inferred from physical interaction
TC0X00001710.mm.1	2.4	0.000116	2.25	0.000816	2.63	0.000387		TC0X00001710.mm.1	Mid1	midline 1	+	NM_010797	chrX	169685199 - 170005736	Complex		169685199	170005736	483	X and Y|X 79.19 cM	17318	NM_010797	RefSeq	Mus musculus midline 1 (Mid1), transcript variant 1, mRNA.	chrX	100	100	0		0	NM_010797	O70583	NM_010797	Mm.34441	bone| bone marrow| brain| connective tissue| dorsal root ganglion| embryonic tissue| extraembryonic tissue| eye| fertilized ovum| heart| inner ear| intestine| kidney| liver| lung| mammary gland| ovary| oviduct| pancreas| prostate| salivary gland| skin| stomach| testis| thymus|oocyte| zygote| morula| blastocyst| organogenesis| fetus| neonate| juvenile| adult	NM_010797	GO:0007026	negative regulation of microtubule depolymerization	inferred from genetic interaction	NM_010797	GO:0005622	intracellular	inferred from electronic annotation
TC0X00001712.mm.1	4.64	0.004308	6.22	0.005717	10.58	0.001502		TC0X00001712.mm.1			+		chrX	169970274 - 169971354	NonCoding		169970274	169971354	30			NONMMUT074716	NONCODE	Non-coding transcript identified by NONCODE: Sense No Exonic	chrX	100	100	0		0
TC0X00001713.mm.1	23.09	3.6e-05	18.05	0.000181	27.13	1.2e-05		TC0X00001713.mm.1			+		chrX	169979742 - 169981291	NonCoding		169979742	169981291	30			NONMMUT074724	NONCODE	Non-coding transcript identified by NONCODE: Sense No Exonic	chrX	100	100	0		0
TC0X00001828.mm.1	2.62	0.002137	4.56	0.000747	4.13	0.000304		TC0X00001828.mm.1			-		chrX	9328975 - 9332607	NonCoding		9328975	9332607	30			KnowTID_00007994	Luo lincRNA	Non-coding transcript identified by Luo, et al.	chrX	100	100	0		0
TC0X00002947.mm.1	4.89	0.011704	4.23	0.005611	7.25	0.002832		TC0X00002947.mm.1			-		chrX	126695452 - 126773891	NonCoding		126695452	126773891	30			NONMMUT073821	NONCODE	Non-coding transcript identified by NONCODE: Linc	chrX	100	100	0		0
TC0X00003379.mm.1	12.98	8.1e-05	16.34	0.001522	19.9	0.000115		TC0X00003379.mm.1	G530011O06Rik	RIKEN cDNA G530011O06 gene	-	NR_029457	chrX	169974401 - 169985232	NonCoding		169974401	169985232	100	X and Y|X	654820	NR_029457	RefSeq	Mus musculus RIKEN cDNA G530011O06 gene (G530011O06Rik), long non-coding RNA.	chrX	100	100	0		0	NR_029457	O70583	NR_029457	Mm.34441	bone| bone marrow| brain| connective tissue| dorsal root ganglion| embryonic tissue| extraembryonic tissue| eye| fertilized ovum| heart| inner ear| intestine| kidney| liver| lung| mammary gland| ovary| oviduct| pancreas| prostate| salivary gland| skin| stomach| testis| thymus|oocyte| zygote| morula| blastocyst| organogenesis| fetus| neonate| juvenile| adult	NR_029457	GO:0007026	negative regulation of microtubule depolymerization	inferred from genetic interaction	NR_029457	GO:0005622	intracellular	inferred from electronic annotation	NR_029457	GO:0005515	protein binding	inferred from physical interaction
TC0X00003380.mm.1	9.77	0.000366	7.4	0.004166	7.85	0.001367		TC0X00003380.mm.1	Gm15247	predicted gene 15247	-	ENSMUST00000124513	chrX	169985801 - 169986939	NonCoding		169985801	169986939	30			ENSMUST00000124513	ENSEMBL	havana:known chromosome:GRCm38:X:169985801:169986939:-1 gene:ENSMUSG00000086695 gene_biotype:antisense transcript_biotype:antisense	chrX	100	100	0		0
TC0Y00000221.mm.1	8.79	0.000141	9.66	0.003406	11.04	0.000218		TC0Y00000221.mm.1	Gm21857	predicted gene, 21857	+	ENSMUST00000167967	chrY	90744697 - 90765072	Complex		90744697	90765072	138			ENSMUST00000167967	ENSEMBL	havana:known chromosome:GRCm38:Y:90753057:90763485:1 gene:ENSMUSG00000095134 gene_biotype:pseudogene transcript_biotype:unprocessed_pseudogene	chrY	100	100	0		0	ENSMUST00000167967	F7AQZ8	uc029ygw.1	Mm.34441	bone| bone marrow| brain| connective tissue| dorsal root ganglion| embryonic tissue| extraembryonic tissue| eye| fertilized ovum| heart| inner ear| intestine| kidney| liver| lung| mammary gland| ovary| oviduct| pancreas| prostate| salivary gland| skin| stomach| testis| thymus|oocyte| zygote| morula| blastocyst| organogenesis| fetus| neonate| juvenile| adult	uc029ygw.1	GO:0007026	negative regulation of microtubule depolymerization	inferred from genetic interaction	uc029ygw.1	GO:0005622	intracellular	inferred from electronic annotation	ENSMUST00000167967	GO:0005515	protein binding	inferred from electronic annotation
TC0Y00000223.mm.1	2.07	0.013113	2.89	0.003984	2.99	0.018849		TC0Y00000223.mm.1	Erdr1	erythroid differentiation regulator 1	+	NM_133362	chrY	90784610 - 90816465	Complex		90784610	90816465	86	X;Y|Y	170942	NM_133362	RefSeq	Mus musculus erythroid differentiation regulator 1 (Erdr1), mRNA.	chrY	100	100	0		0	NM_133362	O88727	NM_133362	Mm.391385	blood| brain| embryonic tissue| extraembryonic tissue| eye| lung| mammary gland| pancreas| skin| testis| gastrula| organogenesis| fetus| juvenile| adult	NM_133362	GO:0008285	negative regulation of cell proliferation	inferred from direct assay	NM_133362	GO:0005575	cellular_component	no biological data available	NM_133362	GO:0003674	molecular_function	no biological data available
TC0Y00000224.mm.1	11.23	6.5e-05	12.17	0.002745	13.76	0.000189		TC0Y00000224.mm.1	Mid1	midline 1	+	uc029yhg.1	chrY	90833347 - 90842916	NonCoding		90833347	90842916	48	X and Y|X 79.19 cM	17318	uc029yhg.1	UCSC Genes	Mus musculus clone MEX2A-1 Mid1 mRNA, partial sequence.	chrY	100	100	0		0	uc029yhg.1	O70583	uc029yhg.1	Mm.34441	bone| bone marrow| brain| connective tissue| dorsal root ganglion| embryonic tissue| extraembryonic tissue| eye| fertilized ovum| heart| inner ear| intestine| kidney| liver| lung| mammary gland| ovary| oviduct| pancreas| prostate| salivary gland| skin| stomach| testis| thymus|oocyte| zygote| morula| blastocyst| organogenesis| fetus| neonate| juvenile| adult	uc029yhg.1	GO:0007026	negative regulation of microtubule depolymerization	inferred from genetic interaction	uc029yhg.1	GO:0005622	intracellular	inferred from electronic annotation	uc029yhg.1	GO:0005515	protein binding	inferred from physical interaction
TC0Y00000225.mm.1	10.36	0.000624	14.08	0.001777	28.21	0.000204		TC0Y00000225.mm.1	Gm21742	predicted gene, 21742	+	ENSMUST00000178550	chrY	90843934 - 90844074	Coding		90843934	90844074	30			ENSMUST00000178550	ENSEMBL	[retired] cdna:novel chromosome:GRCm38:Y:90843934:90844074:1 gene:ENSMUSG00000095326 gene_biotype:protein_coding transcript_biotype:protein_coding	chrY	100	100	0		0
TC0Y00000551.mm.1	10.88	0.000508	11.94	0.002949	12.58	0.000146		TC0Y00000551.mm.1	Gm21860	predicted gene, 21860	-	ENSMUST00000177893	chrY	90754513 - 90754821	Coding		90754513	90754821	30			ENSMUST00000177893	ENSEMBL	ensembl:known chromosome:GRCm38:Y:90754513:90754821:-1 gene:ENSMUSG00000095366 gene_biotype:protein_coding transcript_biotype:protein_coding	chrY	100	100	0		0	ENSMUST00000177893	Q3UE70
TC0Y00000552.mm.1	10.88	0.000508	11.94	0.002949	12.58	0.000146		TC0Y00000552.mm.1	Gm21748	predicted gene, 21748	-	ENSMUST00000179623	chrY	90838869 - 90839177	Coding		90838869	90839177	30			ENSMUST00000179623	ENSEMBL	ensembl:known chromosome:GRCm38:Y:90838869:90839177:-1 gene:ENSMUSG00000096850 gene_biotype:protein_coding transcript_biotype:protein_coding	chrY	100	100	0		0	ENSMUST00000179623	Q3UE70
TC1000000514.mm.1	3.13	0.019691	2.01	0.005198	2.01	0.021188		TC1000000514.mm.1	Lims1	LIM and senescent cell antigen-like domains 1	+	NM_001193303	chr10	58323466 - 58424691	Complex		58323466	58424691	240	10 B4|10 29.31 cM	110829	NM_001193303	RefSeq	Mus musculus LIM and senescent cell antigen-like domains 1 (Lims1), transcript variant 3, mRNA.	chr10	100	100	0		0	NM_001193303	Q99JW4	NM_001193303	Mm.57734	bladder| bone| bone marrow| brain| connective tissue| embryonic tissue| extraembryonic tissue| eye| heart| inner ear| intestine| kidney| liver| lung| lymph node| mammary gland| molar| nasopharynx| ovary| pancreas| pituitary gland| prostate| skin| spleen| stomach| testis| thymus| tongue| uterus| unfertilized ovum| cleavage| blastocyst| egg cylinder| gastrula| organogenesis| fetus| neonate| juvenil…	NM_001193303	GO:0007160	cell-matrix adhesion	inferred from mutant phenotype	NM_001193303	GO:0005886	plasma membrane	inferred from electronic annotation	NM_001193303	GO:0005515	protein binding	inferred from physical interaction
TC1000001624.mm.1	2.31	0.001195	3.63	0.019305	2.18	0.030279		TC1000001624.mm.1	Sarnp	SAP domain containing ribonucleoprotein	+	NM_025364	chr10	128821771 - 128877638	Complex		128821771	128877638	137	10|10 C1	66118	NM_025364	RefSeq	Mus musculus SAP domain containing ribonucleoprotein (Sarnp), mRNA.	chr10	100	100	0		0	NM_025364	Q9D1J3	NM_025364	Mm.351579	bone marrow| brain| connective tissue| dorsal root ganglion| embryonic tissue| extraembryonic tissue| eye| fertilized ovum| heart| intestine| joint| kidney| liver| lung| lymph node| mammary gland| muscle| ovary| pancreas| pituitary gland| prostate| skin| spinal cord| spleen| stomach| testis| thymus| tongue| uterus|oocyte| zygote| cleavage| morula| blastocyst| egg cylinder| gastrula| organogenesis…	NM_025364	GO:0000122	negative regulation of transcription from RNA polymerase II promoter	inferred from direct assay	NM_025364	GO:0000346	transcription export complex	not recorded	NM_025364	GO:0000978	RNA polymerase II core promoter proximal region sequence-specific DNA binding	inferred from direct assay
TC1000002195.mm.1	2.74	0.004347	5.19	0.000332	4.8	0.013985		TC1000002195.mm.1	Serinc1	serine incorporator 1	-	NM_019760	chr10	57515774 - 57532530	Complex		57515774	57532530	162	10 B4|10	56442	NM_019760	RefSeq	Mus musculus serine incorporator 1 (Serinc1), mRNA.	chr10	100	100	0		0	NM_019760	Q9QZI8	NM_019760	Mm.29344	adipose tissue| adrenal gland| bladder| blood| bone| bone marrow| brain| connective tissue| dorsal root ganglion| embryonic tissue| extraembryonic tissue| eye| fertilized ovum| heart| inner ear| intestine| kidney| liver| lung| lymph node| mammary gland| molar| muscle| nasopharynx| ovary| oviduct| pancreas| pineal gland| pituitary gland| prostate| salivary gland| skin| spinal cord| spleen| stomach…	NM_019760	GO:0006629	lipid metabolic process	inferred from electronic annotation	NM_019760	GO:0005783	endoplasmic reticulum	inferred from electronic annotation	NM_019760	GO:0015194	L-serine transmembrane transporter activity	not recorded
TC1100000338.mm.1	2.6	0.016672	4.56	0.017365	3.84	0.038224		TC1100000338.mm.1			+		chr11	32293505 - 32296204	NonCoding		32293505	32296204	30			NONMMUT009184	NONCODE	Non-coding transcript identified by NONCODE: Linc	chr11	100	100	0		0
TC1100000348.mm.1	371.43	0.000597	183.17	1.4e-05	190.2	0.000333		TC1100000348.mm.1	Gm10462	predicted gene 10462	+	ENSMUST00000178956	chr11	32725889 - 32726208	Complex		32725889	32726208	30			ENSMUST00000178956	ENSEMBL	[retired] cdna:pseudogene chromosome:GRCm38:11:32725889:32726208:1 gene:ENSMUSG00000094225 gene_biotype:processed_pseudogene transcript_biotype:pseudogene	chr11	100	100	0		0
TC1100000349.mm.1	404.97	0.00082	182.36	4.5e-05	237.67	0.000453		TC1100000349.mm.1	Gm10462	predicted gene 10462	+	ENSMUST00000101381	chr11	32726501 - 32726820	Complex		32726501	32726820	30			ENSMUST00000101381	ENSEMBL	[retired] cdna:pseudogene chromosome:GRCm38:11:32726501:32726820:1 gene:ENSMUSG00000073057 gene_biotype:processed_pseudogene transcript_biotype:pseudogene	chr11	100	100	0		0
TC1100000948.mm.1	3	0.028692	5	0.000107	3.33	0.016074		TC1100000948.mm.1	Gm12312	predicted gene 12312	+	ENSMUST00000120351	chr11	70358138 - 70358781	Complex		70358138	70358781	30			ENSMUST00000120351	ENSEMBL	havana:known chromosome:GRCm38:11:70358138:70358781:1 gene:ENSMUSG00000082145 gene_biotype:pseudogene transcript_biotype:processed_pseudogene	chr11	100	100	0		0
TC1100002314.mm.1	3.45	0.015681	2.57	0.004914	2.47	0.046719		TC1100002314.mm.1	Lgalsl	lectin, galactoside binding-like	-	NM_173752	chr11	20823355 - 20831108	Complex		20823355	20831108	130	11 A3.1|11 13.53 cM	216551	NM_173752	RefSeq	Mus musculus lectin, galactoside binding-like (Lgalsl), mRNA.	chr11	100	100	0		0	NM_173752	Q8VED9	NM_173752	Mm.76694	bladder| bone| bone marrow| brain| embryonic tissue| extraembryonic tissue| eye| fertilized ovum| intestine| joint| kidney| liver| lung| mammary gland| molar| nasopharynx| ovary| pancreas| pineal gland| pituitary gland| salivary gland| skin| spinal cord| spleen| tongue| uterus|oocyte| zygote| cleavage| morula| gastrula| organogenesis| fetus| neonate| juvenile| adult	NM_173752	GO:0008150	biological_process	no biological data available	NM_173752	GO:0005622	intracellular	not recorded	NM_173752	GO:0030246	carbohydrate binding	inferred from electronic annotation
TC1100002784.mm.1	2.27	0.003762	2.29	0.003294	2.08	0.002251		TC1100002784.mm.1	Atox1	ATX1 (antioxidant protein 1) homolog 1 (yeast)	-	NM_009720	chr11	55446641 - 55461239	Complex		55446641	55461239	70	11 B1.3|11 33.07 cM	11927	NM_009720	RefSeq	Mus musculus ATX1 (antioxidant protein 1) homolog 1 (yeast) (Atox1), mRNA.	chr11	100	100	0		0	NM_009720	O08997	NM_009720	Mm.217759	brain| embryonic tissue| extraembryonic tissue| eye| heart| inner ear| intestine| joint| kidney| liver| lymph node| mammary gland| muscle| pancreas| prostate| salivary gland| skin| spleen| stomach| testis| thymus| thyroid| uterus| cleavage| gastrula| organogenesis| fetus| neonate| juvenile| adult	NM_009720	GO:0006810	transport	inferred from electronic annotation	NM_009720	GO:0005829	cytosol	traceable author statement	NM_009720	GO:0005375	copper ion transmembrane transporter activity	not recorded
TC1100003090.mm.1	8.09	0.011126	3.41	0.002847	7.55	0.038399		TC1100003090.mm.1	Alox12	arachidonate 12-lipoxygenase	-	NM_007440	chr11	70241455 - 70255353	Coding		70241455	70255353	190	11 B3|11 42.99 cM	11684	NM_007440	RefSeq	Mus musculus arachidonate 12-lipoxygenase (Alox12), mRNA.	chr11	100	100	0		0	NM_007440	P39655	NM_007440	Mm.12286	bladder| brain| dorsal root ganglion| embryonic tissue| inner ear| intestine| joint| kidney| lung| lymph node| mammary gland| olfactory mucosa| ovary| prostate| skin| spleen| vagina|oocyte| cleavage| fetus| neonate| juvenile| adult					NM_007440	GO:0005737	cytoplasm	inferred from direct assay	NM_007440	GO:0004052	arachidonate 12-lipoxygenase activity	inferred from direct assay	NM_007440	GenMAPP
TC1100003629.mm.1	21.6	6.7e-05	288.17	6.2e-05	245.86	5e-06		TC1100003629.mm.1	Pnpo	pyridoxine 5-phosphate oxidase	-	NM_134021	chr11	96937816 - 96944019	Complex		96937816	96944019	113	11 D|11	103711	NM_134021	RefSeq	Mus musculus pyridoxine 5-phosphate oxidase (Pnpo), mRNA.	chr11	100	100	0		0	NM_134021	Q91XF0	NM_134021	Mm.254704	adipose tissue| bladder| bone| bone marrow| brain| connective tissue| dorsal root ganglion| embryonic tissue| extraembryonic tissue| eye| heart| inner ear| intestine| kidney| liver| lung| lymph node| mammary gland| ovary| pancreas| pituitary gland| salivary gland| skin| spinal cord| spleen| stomach| sympathetic ganglion| testis| thymus| thyroid| uterus| blastocyst| gastrula| organogenesis| fetus|…	NM_134021	GO:0008615	pyridoxine biosynthetic process	inferred from electronic annotation	ENSMUST00000018803	GO:0005575	cellular_component	no biological data available	NM_134021	GO:0004733	pyridoxamine-phosphate oxidase activity	not recorded
TC1100003817.mm.1	5.03	0.006646	2.64	0.001369	2.83	0.03653		TC1100003817.mm.1	Dusp3	dual specificity phosphatase 3 (vaccinia virus phosphatase VH1-related)	-	NM_028207	chr11	101971143 - 101987013	Complex		101971143	101987013	139	11 D|11	72349	NM_028207	RefSeq	Mus musculus dual specificity phosphatase 3 (vaccinia virus phosphatase VH1-related) (Dusp3), mRNA.	chr11	100	100	0		0	NM_028207	Q9D7X3	NM_028207	Mm.491149	bladder| bone| bone marrow| brain| embryonic tissue| extraembryonic tissue| eye| heart| inner ear| intestine| kidney| liver| mammary gland| pancreas| spleen| stomach| sympathetic ganglion| testis| thymus| cleavage| blastocyst| fetus| neonate| juvenile| adult					NM_028207	GO:0001772	immunological synapse	not recorded	NM_028207	GO:0004721	phosphoprotein phosphatase activity	inferred from direct assay
TC1100004240.mm.1	2.66	0.010818	2.48	0.034269	3.13	0.004637		TC1100004240.mm.1	Cd7	CD7 antigen	-	NM_009854	chr11	121036747 - 121039478	Complex		121036747	121039478	60	11 E2|11 84.85 cM	12516	NM_009854	RefSeq	Mus musculus CD7 antigen (Cd7), mRNA.	chr11	100	100	0		0	NM_009854	P50283	NM_009854	Mm.4100	intestine| mammary gland| ovary| pancreas| spleen| thymus| uterus|oocyte| juvenile| adult	NM_009854	GO:0002376	immune system process	inferred from electronic annotation	NM_009854	GO:0016020	membrane	inferred from electronic annotation	ENSMUST00000026159	GO:0005515	protein binding	inferred from electronic annotation
TC1200000987.mm.1	5.15	0.03642	3.71	0.003757	3.33	0.007913		TC1200000987.mm.1			+		chr12	99643093 - 99647220	NonCoding		99643093	99647220	30			NONMMUT015370	NONCODE	Non-coding transcript identified by NONCODE: Linc	chr12	100	100	0		0
TC1200002378.mm.1	9.52	0.001095	13.44	0.000112	4.86	0.006708		TC1200002378.mm.1			-		chr12	110011084 - 110014027	NonCoding		110011084	110014027	91			NONMMUT015882	NONCODE	Non-coding transcript identified by NONCODE: Linc	chr12	100	100	0		0
TC1200002595.mm.1	3.55	0.005549	4.44	0.006101	3.22	0.023957		TC1200002595.mm.1	Ighv6-3	immunoglobulin heavy variable 6-3	-	ENSMUST00000103486	chr12	114391712 - 114392169	Coding		114391712	114392169	20			ENSMUST00000103486	ENSEMBL	ensembl_ig_gene:known chromosome:GRCm38:12:114391712:114392169:-1 gene:ENSMUSG00000076677 gene_biotype:IG_LV_gene transcript_biotype:IG_LV_gene	chr12	100	100	0		0														ENSMUST00000103486	GO:0005515	protein binding	inferred from electronic annotation
TC1300000178.mm.1	11.26	0.000262	4.63	0.011541	5.85	0.016913		TC1300000178.mm.1	Gm11274	predicted gene 11274	+	ENSMUST00000146857	chr13	21769125 - 21770476	NonCoding		21769125	21770476	30			ENSMUST00000146857	ENSEMBL	havana:known chromosome:GRCm38:13:21769125:21770476:1 gene:ENSMUSG00000085331 gene_biotype:antisense transcript_biotype:antisense	chr13	100	100	0		0			ENSMUST00000146857	Mm.394420	mammary gland| juvenile
TC1300000962.mm.1	8.62	0.02366	3.08	0.007533	4.68	0.026834		TC1300000962.mm.1			+		chr13	81065924 - 81066466	NonCoding		81065924	81066466	30			NONMMUT018460	NONCODE	Non-coding transcript identified by NONCODE: Linc	chr13	100	100	0		0
TC1300000992.mm.1	12.11	0.000159	16.73	0.002946	11.29	0.042441		TC1300000992.mm.1			+		chr13	85390245 - 85390749	NonCoding		85390245	85390749	30			NONMMUT018545	NONCODE	Non-coding transcript identified by NONCODE: Linc	chr13	100	100	0		0
TC1300001081.mm.1	68.7	0.000114	34.37	4e-06	34.77	0.004417		TC1300001081.mm.1	F2rl2	coagulation factor II (thrombin) receptor-like 2	+	NM_010170	chr13	95696853 - 95702768	Coding		95696853	95702768	75	13 D1|13 50.38 cM	14064	NM_010170	RefSeq	Mus musculus coagulation factor II (thrombin) receptor-like 2 (F2rl2), mRNA.	chr13	100	100	0		0	NM_010170	O08675	NM_010170	Mm.440952	bone marrow| embryonic tissue| skin| spleen| organogenesis| fetus| neonate| juvenile| adult	NM_010170	GO:0007165	signal transduction	inferred from electronic annotation	NM_010170	GO:0005886	plasma membrane	inferred from electronic annotation	NM_010170	GO:0004871	signal transducer activity	inferred from electronic annotation	NM_010170	GenMAPP
TC1300001644.mm.1	3.53	0.001059	3.24	0.010755	3.04	0.003174		TC1300001644.mm.1	Hist1h4b	histone cluster 1, H4b	-	ENSMUST00000139822	chr13	23755822 - 23757620	NonCoding		23755822	23757620	30	13 A2-A3|13	326620	ENSMUST00000139822	ENSEMBL	ensembl_havana_transcript:known chromosome:GRCm38:13:23756203:23757620:-1 gene:ENSMUSG00000075029 gene_biotype:processed_transcript transcript_biotype:processed_transcript	chr13	100	100	0		0	ENSMUST00000139822	P62806	ENSMUST00000139822	Mm.261642	embryonic tissue| testis| thymus| juvenile| adult	ENSMUST00000139822	GO:0006335	DNA replication-dependent nucleosome assembly	not recorded	ENSMUST00000139822	GO:0000228	nuclear chromosome	not recorded	ENSMUST00000139822	GO:0044822	poly(A) RNA binding	not recorded
TC1300002445.mm.1	2.6	0.001464	2.64	0.000313	2.56	0.000867		TC1300002445.mm.1	Scamp1	secretory carrier membrane protein 1	-	NM_029153	chr13	94201310 - 94285857	Complex		94201310	94285857	200	13 D1|13	107767	NM_029153	RefSeq	Mus musculus secretory carrier membrane protein 1 (Scamp1), mRNA.	chr13	100	100	0		0	NM_029153	Q8K021	NM_029153	Mm.201455	bladder| blood| bone| bone marrow| brain| connective tissue| embryonic tissue| extraembryonic tissue| eye| fertilized ovum| heart| inner ear| intestine| kidney| liver| lung| mammary gland| molar| ovary| pancreas| pituitary gland| prostate| salivary gland| skin| spinal cord| spleen| testis| thyroid| uterus| vagina|oocyte| unfertilized ovum| zygote| cleavage| blastocyst| gastrula| organogenesis| fe…	NM_029153	GO:0006810	transport	inferred from electronic annotation	NM_029153	GO:0005623	cell	inferred from mutant phenotype	NM_029153	GO:0005515	protein binding	inferred from physical interaction
TC1300002691.mm.1	5.09	0.046765	8.89	0.000384	2.8	0.018884		TC1300002691.mm.1	Gzma	granzyme A	-	NM_010370	chr13	113093825 - 113100981	Coding		113093825	113100981	60	13 D|13 63.93 cM	14938	NM_010370	RefSeq	Mus musculus granzyme A (Gzma), mRNA.	chr13	100	100	0		0	NM_010370	P11032	NM_010370	Mm.15510	embryonic tissue| intestine| mammary gland| spleen| thymus| blastocyst| neonate| juvenile| adult	NM_010370	GO:0006508	proteolysis	inferred from direct assay	NM_010370	GO:0005576	extracellular region	inferred from electronic annotation	NM_010370	GO:0003824	catalytic activity	inferred from electronic annotation
TC1300002714.mm.1	10.07	0.012077	3.75	0.001116	6.63	0.022387		TC1300002714.mm.1			-		chr13	114833082 - 114835695	NonCoding		114833082	114835695	30			NONMMUT019423	NONCODE	Non-coding transcript identified by NONCODE: Linc	chr13	100	100	0		0
TC1300002715.mm.1	28.26	0.002346	9.3	0.00015	10.46	0.012244		TC1300002715.mm.1	Itga2	integrin alpha 2	-	NM_008396	chr13	114835912 - 114932041	Coding		114835912	114932041	300	13 D2.2|13 64.61 cM	16398	NM_008396	RefSeq	Mus musculus integrin alpha 2 (Itga2), mRNA.	chr13	100	100	0		0	NM_008396	Q62469	NM_008396	Mm.5007	bone| embryonic tissue| extraembryonic tissue| eye| spleen| organogenesis| fetus| adult	NM_008396	GO:0002687	positive regulation of leukocyte migration	not recorded	NM_008396	GO:0005634	nucleus	not recorded	NM_008396	GO:0005178	integrin binding	not recorded	NM_008396	GenMAPP
TC1400000246.mm.1	6.33	0.038218	4.73	7.2e-05	10.29	0.028475		TC1400000246.mm.1	Ppif	peptidylprolyl isomerase F (cyclophilin F)	+	NM_134084	chr14	25694154 - 25700468	Complex		25694154	25700468	77	14 A3|14	105675	NM_134084	RefSeq	Mus musculus peptidylprolyl isomerase F (cyclophilin F) (Ppif), mRNA.	chr14	100	100	0		0	NM_134084	Q99KR7	NM_134084	Mm.41656	blood| bone| bone marrow| brain| dorsal root ganglion| embryonic tissue| extraembryonic tissue| eye| heart| inner ear| intestine| kidney| liver| lung| lymph node| mammary gland| muscle| nasopharynx| pancreas| pineal gland| prostate| salivary gland| skin| spinal cord| spleen| testis| thymus| uterus| blastocyst| egg cylinder| gastrula| organogenesis| fetus| neonate| juvenile| adult	NM_134084	GO:0000413	protein peptidyl-prolyl isomerization	not recorded	NM_134084	GO:0005739	mitochondrion	inferred from direct assay	NM_134084	GO:0003755	peptidyl-prolyl cis-trans isomerase activity	not recorded
TC1400000439.mm.1	3.34	0.043321	2.59	0.04802	2.63	0.018284		TC1400000439.mm.1			+		chr14	43254605 - 43256505	NonCoding		43254605	43256505	30			KnowTID_00002284	Luo lincRNA	Non-coding transcript identified by Luo, et al.	chr14	100	100	0		0
TC1400000574.mm.1	3.81	0.007641	2.96	0.003908	4.15	0.006086		TC1400000574.mm.1	Pnp	purine-nucleoside phosphorylase	+	NM_013632	chr14	50944302 - 50965237	Coding		50944302	50965237	116	14 B-C1|14 26.31 cM	18950	NM_013632	RefSeq	Mus musculus purine-nucleoside phosphorylase (Pnp), mRNA.	chr14	100	100	0		0	NM_013632	P23492	NM_013632	Mm.17932	blood| bone| bone marrow| brain| dorsal root ganglion| embryonic tissue| extraembryonic tissue| eye| heart| inner ear| intestine| joint| kidney| liver| lung| lymph node| mammary gland| ovary| pancreas| prostate| salivary gland| skin| spleen| stomach| testis| thymus| uterus|oocyte| cleavage| morula| blastocyst| gastrula| organogenesis| fetus| neonate| juvenile| adult	NM_013632	GO:0001916	positive regulation of T cell mediated cytotoxicity	inferred from mutant phenotype	NM_013632	GO:0005576	extracellular region	not recorded	NM_013632	GO:0001882	nucleoside binding	not recorded
TC1400000575.mm.1	3.06	0.00284	2.93	0.000702	3.33	0.001613		TC1400000575.mm.1	Pnp2	purine-nucleoside phosphorylase 2	+	NM_001123371	chr14	50955992 - 50964749	Coding		50955992	50964749	70	14 C1|14	667034	NM_001123371	RefSeq	Mus musculus purine-nucleoside phosphorylase 2 (Pnp2), mRNA.	chr14	100	100	0		0	NM_001123371	Q9D8C9	NM_001123371	Mm.482171	blood| bone marrow| brain| connective tissue| embryonic tissue| extraembryonic tissue| intestine| kidney| liver| lung| lymph node| mammary gland| molar| muscle| pituitary gland| skin| spleen| testis| cleavage| blastocyst| organogenesis| fetus| juvenile| adult	NM_001123371	GO:0006139	nucleobase-containing compound metabolic process	inferred from electronic annotation	NM_001123371	GO:0005576	extracellular region	not recorded	NM_001123371	GO:0001882	nucleoside binding	not recorded
TC1400000641.mm.1	2.11	0.002954	2.76	0.02232	2.37	0.005259		TC1400000641.mm.1	Trav4d-3	T cell receptor alpha variable 4D-3	+	ENSMUST00000103592	chr14	52899969 - 52900470	Complex		52899969	52900470	18			ENSMUST00000103592	ENSEMBL	ensembl_ig_gene:known chromosome:GRCm38:14:52899969:52900470:1 gene:ENSMUSG00000093939 gene_biotype:IG_LV_gene transcript_biotype:IG_LV_gene	chr14	100	100	0		0														ENSMUST00000103592	GO:0005515	protein binding	inferred from electronic annotation
TC1400002050.mm.1	2.24	0.012198	2.33	0.013847	2.9	0.004161		TC1400002050.mm.1	Dad1	defender against cell death 1	-	NM_001113358	chr14	54235479 - 54254104	Coding		54235479	54254104	58	14 C2|14 27.7 cM	13135	NM_001113358	RefSeq	Mus musculus defender against cell death 1 (Dad1), transcript variant 1, mRNA.	chr14	100	100	0		0	NM_001113358	P61804	NM_001113358	Mm.319038	bladder| blood| brain| embryonic tissue| epididymis| extraembryonic tissue| eye| fertilized ovum| heart| intestine| kidney| liver| lung| mammary gland| molar| muscle| ovary| oviduct| pancreas| pineal gland| pituitary gland| prostate| skin| spinal cord| spleen| stomach| testis| thymus| thyroid| tongue| uterus| vagina| zygote| cleavage| morula| blastocyst| organogenesis| fetus| neonate| juvenile| a…	NM_001113358	GO:0001824	blastocyst development	inferred from mutant phenotype	NM_001113358	GO:0005783	endoplasmic reticulum	inferred from electronic annotation	NM_001113358	GO:0004579	dolichyl-diphosphooligosaccharide-protein glycotransferase activity	inferred from electronic annotation
TC1400002320.mm.1	2.65	0.001021	3.15	0.000231	2.45	0.000549		TC1400002320.mm.1	RP23-103I12.3	novel transcript, antisense to Loxl2 and a copy of Entpd4	-	OTTMUST00000117117	chr14	69581754 - 69762619	NonCoding		69581754	69762619	130			OTTMUST00000117117	Havana transcript	cdna:all chromosome:VEGA56:14:69637669:69644752:-1 Gene:OTTMUSG00000044490	chr14	100	100	0		0	ENSMUST00000183339	Q920G8	ENSMUST00000183339	Mm.441111	embryonic tissue| liver| stomach| fetus| juvenile	ENSMUST00000183339	GO:0006810	transport	inferred from electronic annotation	ENSMUST00000183339	GO:0005739	mitochondrion	inferred from electronic annotation	ENSMUST00000183339	GO:0005381	iron ion transmembrane transporter activity	inferred from mutant phenotype
TC1400002321.mm.1	2.19	0.003429	3.03	0.00199	3.41	0.003158		TC1400002321.mm.1			-		chr14	69613779 - 69616046	NonCoding		69613779	69616046	30			NONMMUT021428	NONCODE	Non-coding transcript identified by NONCODE: Antisense	chr14	100	100	0		0
TC1400002322.mm.1	3.52	0.006016	4.14	0.000125	2.49	0.00342		TC1400002322.mm.1			-		chr14	69622550 - 69624863	NonCoding		69622550	69624863	30			NONMMUT021429	NONCODE	Non-coding transcript identified by NONCODE: Antisense	chr14	100	100	0		0
TC1400002324.mm.1	94.5	3e-05	422.1	2.2e-05	265.86	4e-06		TC1400002324.mm.1	RP23-103I12.3	novel transcript, antisense to Loxl2 and a copy of Entpd4	-	OTTMUST00000117168	chr14	69680028 - 69683286	NonCoding		69680028	69683286	30			OTTMUST00000117168	Havana transcript	cdna:all chromosome:VEGA56:14:69680584:69683286:-1 Gene:OTTMUSG00000044490	chr14	100	100	0		0	ENSMUST00000183514	Q920G8	ENSMUST00000183514	Mm.441111	embryonic tissue| liver| stomach| fetus| juvenile	ENSMUST00000183514	GO:0006810	transport	inferred from electronic annotation	ENSMUST00000183514	GO:0005739	mitochondrion	inferred from electronic annotation	ENSMUST00000183514	GO:0005381	iron ion transmembrane transporter activity	inferred from mutant phenotype
TC1500000102.mm.1	9.96	0.000563	5.64	0.001076	17.45	6.4e-05		TC1500000102.mm.1	Gm2573	predicted gene 2573	+	XM_001474178	chr15	12181147 - 12181467	Coding		12181147	12181467	30	15 A1|15	100040052	XM_001474178	RefSeq	PREDICTED: Mus musculus predicted gene 2573 (Gm2573), mRNA.	chr15	100	100	0		0
TC1500000688.mm.1	4.12	0.001696	3.51	6.3e-05	4.78	0.003025		TC1500000688.mm.1	Apobec3	apolipoprotein B mRNA editing enzyme, catalytic polypeptide 3	+	NM_001160415	chr15	79891659 - 79915906	Complex		79891659	79915906	360	15 48.6 cM|15 E2	80287	NM_001160415	RefSeq	Mus musculus apolipoprotein B mRNA editing enzyme, catalytic polypeptide 3 (Apobec3), transcript variant 1, mRNA.	chr15	100	100	0		0	NM_001160415	Q99J72	NM_001160415	Mm.284059	bladder| bone| bone marrow| brain| embryonic tissue| eye| intestine| kidney| liver| lung| lymph node| mammary gland| nasopharynx| oviduct| pancreas| salivary gland| spinal cord| spleen| thymus| morula| blastocyst| organogenesis| fetus| neonate| juvenile| adult					NM_001160415	GO:0005634	nucleus	not recorded
TC1500001727.mm.1	3.33	0.009905	3.08	0.004074	2.09	0.023261		TC1500001727.mm.1	Ly6i	lymphocyte antigen 6 complex, locus I	-	NM_020498	chr15	74979812 - 74983430	Coding		74979812	74983430	50	15 D3|15	57248	NM_020498	RefSeq	Mus musculus lymphocyte antigen 6 complex, locus I (Ly6i), mRNA.	chr15	100	100	0		0	NM_020498	Q9WU67	NM_020498	Mm.358339						NM_020498	GO:0005886	plasma membrane	traceable author statement
TC1500001728.mm.1	6.61	0.003493	8.76	0.003154	9.95	0.027752		TC1500001728.mm.1	Ly6a	lymphocyte antigen 6 complex, locus A	-	NM_001271416	chr15	74994877 - 74998031	Complex		74994877	74998031	40	15 D3|15 34.29 cM	110454	NM_001271416	RefSeq	Mus musculus lymphocyte antigen 6 complex, locus A (Ly6a), transcript variant 1, mRNA.	chr15	100	100	0		0	NM_001271416	P05533	NM_001271416	Mm.425949	blood| bone marrow| brain| connective tissue| embryonic tissue| extraembryonic tissue| eye| heart| intestine| joint| kidney| liver| lung| lymph node| mammary gland| muscle| prostate| salivary gland| skin| spleen| stomach| testis| thymus| thyroid| tongue| uterus| blastocyst| organogenesis| fetus| neonate| juvenile| adult					NM_001271416	GO:0005622	intracellular	inferred from direct assay
TC1500001731.mm.1	78.06	0.001498	93.12	1.2e-05	13.25	0.012299		TC1500001731.mm.1	I830127L07Rik	RIKEN cDNA I830127L07 gene	-	XM_001477102	chr15	75131308 - 75135128	Complex		75131308	75135128	50	15 D3|15	546643	XM_001477102	RefSeq	PREDICTED: Mus musculus RIKEN cDNA I830127L07 gene (I830127L07Rik), transcript variant X1, mRNA.	chr15	100	100	0		0	XM_001477102	Q3U8E9	XM_001477102	Mm.322624	bone marrow| mammary gland| juvenile	XM_001477102	GO:0008150	biological_process	no biological data available	XM_001477102	GO:0005575	cellular_component	no biological data available	XM_001477102	GO:0003674	molecular_function	no biological data available
TC1500002299.mm.1	4.49	0.025305	2.01	0.01864	2.83	0.025843		TC1500002299.mm.1	Atp5g2	ATP synthase, H+ transporting, mitochondrial F0 complex, subunit C2 (subunit 9)	-	NM_026468	chr15	102662864 - 102671047	Coding		102662864	102671047	50	15 F3|15	67942	NM_026468	RefSeq	Mus musculus ATP synthase, H+ transporting, mitochondrial F0 complex, subunit C2 (subunit 9) (Atp5g2), mRNA.	chr15	100	100	0		0	NM_026468	P56383	NM_026468	Mm.10314	adipose tissue| blood| bone| bone marrow| brain| embryonic tissue| extraembryonic tissue| eye| heart| inner ear| intestine| joint| kidney| liver| lung| mammary gland| muscle| ovary| pancreas| pituitary gland| salivary gland| skin| spleen| stomach| testis| thymus| thyroid|oocyte| morula| blastocyst| organogenesis| fetus| neonate| juvenile| adult	NM_026468	GO:0006810	transport	inferred from electronic annotation	NM_026468	GO:0005739	mitochondrion	inferred from direct assay	NM_026468	GO:0008289	lipid binding	inferred from electronic annotation	NM_026468	GenMAPP
TC1600000306.mm.1	4.23	0.039906	4.48	0.001126	2.28	0.042043		TC1600000306.mm.1	Gm6467	predicted gene 6467	+	ENSMUST00000171547	chr16	21896506 - 21897116	Pseudogene		21896506	21897116	30			ENSMUST00000171547	ENSEMBL	ensembl:known chromosome:GRCm38:16:21896506:21897116:1 gene:ENSMUSG00000091580 gene_biotype:pseudogene transcript_biotype:pseudogene	chr16	100	100	0		0
TC1600000440.mm.1	6.66	0.002417	4.35	0.000657	5.93	0.004478		TC1600000440.mm.1	Tm4sf19	transmembrane 4 L six family member 19	+	NM_001160402	chr16	32400506 - 32408227	Coding		32400506	32408227	50	16 B3|16	277203	NM_001160402	RefSeq	Mus musculus transmembrane 4 L six family member 19 (Tm4sf19), mRNA.	chr16	100	100	0		0	NM_001160402	B2RWD4	NM_001160402	Mm.484240	blood| bone	NM_001160402	GO:0008150	biological_process	no biological data available	NM_001160402	GO:0005575	cellular_component	no biological data available	NM_001160402	GO:0003674	molecular_function	no biological data available
TC1600000441.mm.1	4.87	0.001282	10.32	0.000693	9.64	0.000632		TC1600000441.mm.1	Gm20056	predicted gene, 20056	+	XM_003085105	chr16	32408524 - 32409057	Coding		32408524	32409057	30	16|16 22.67 cM	100504089	XM_003085105	RefSeq	PREDICTED: Mus musculus predicted gene, 20056 (Gm20056), mRNA.	chr16	100	100	0		0
TC1600000674.mm.1	4.02	0.015441	5.25	0.01962	2.34	0.024507		TC1600000674.mm.1	Btla	B and T lymphocyte associated	+	NM_001037719	chr16	45224315 - 45252895	Coding		45224315	45252895	70	16 B5|16	208154	NM_001037719	RefSeq	Mus musculus B and T lymphocyte associated (Btla), transcript variant 1, mRNA.	chr16	100	100	0		0	NM_001037719	Q7TSA3	NM_001037719	Mm.38199	bladder| bone marrow| embryonic tissue| liver| lung| lymph node| mammary gland| spleen| thymus| fetus| juvenile| adult	NM_001037719	GO:0002376	immune system process	inferred from electronic annotation	NM_001037719	GO:0005887	integral component of plasma membrane	inferred from direct assay	NM_001037719	GO:0004872	receptor activity	inferred from genetic interaction
TC1600001105.mm.1	2.01	0.03989	2.9	0.000891	2.64	0.000903		TC1600001105.mm.1			-		chr16	3640459 - 3643388	NonCoding		3640459	3643388	27			NONMMUT025201	NONCODE	Non-coding transcript identified by NONCODE: Linc	chr16	100	100	0		0
TC1600001324.mm.1	5.64	0.033615	3.64	0.012841	2.41	0.034556		TC1600001324.mm.1	Iglv1	immunoglobulin lambda variable 1	-	ENSMUST00000103746	chr16	19061382 - 19260844	Complex		19061382	19260844	200			ENSMUST00000103746	ENSEMBL	ensembl_ig_gene:known chromosome:GRCm38:16:19085017:19085460:-1 gene:ENSMUSG00000076934 gene_biotype:IG_LV_gene transcript_biotype:IG_LV_gene	chr16	100	100	0		0	ENSMUST00000103749	P01844	ENSMUST00000103751	Mm.486519	lung| lymph node| juvenile	BC002129	GO:0002376	immune system process	inferred from electronic annotation	ENSMUST00000103749	GO:0005886	plasma membrane	traceable author statement	ENSMUST00000103746	GO:0005515	protein binding	inferred from electronic annotation
TC1600001460.mm.1	7.56	0.032796	4.44	0.008165	12.16	0.013678		TC1600001460.mm.1	Gp5	glycoprotein 5 (platelet)	-	NM_008148	chr16	30307685 - 30310781	Coding		30307685	30310781	21	16 B2|16	14729	NM_008148	RefSeq	Mus musculus glycoprotein 5 (platelet) (Gp5), mRNA.	chr16	100	100	0		0	NM_008148	Q3TA66	NM_008148	Mm.3519	brain| eye| inner ear| spleen| testis| fetus| juvenile| adult	NM_008148	GO:0007160	cell-matrix adhesion	inferred from mutant phenotype	NM_008148	GO:0009986	cell surface	not recorded	NM_008148	GO:0005518	collagen binding	inferred from direct assay
TC1700000561.mm.1	3.96	0.005535	3.57	0.013089	2.48	0.013255		TC1700000561.mm.1			+		chr17	32406409 - 32408060	NonCoding		32406409	32408060	28			NONMMUT029144	NONCODE	Non-coding transcript identified by NONCODE: Linc	chr17	100	100	0		0
TC1700000625.mm.1	3.12	0.006431	2.46	0.007456	2.66	0.005027		TC1700000625.mm.1	H2-Ob	histocompatibility 2, O region beta locus	+	NM_010389	chr17	34238903 - 34245908	Complex		34238903	34245908	175	17 B1|17 17.98 cM	15002	NM_010389	RefSeq	Mus musculus histocompatibility 2, O region beta locus (H2-Ob), mRNA.	chr17	100	100	0		0	NM_010389	A0JNW8	NM_010389	Mm.327358	lung| lymph node| mammary gland| skin| spleen| neonate| juvenile| adult	NM_010389	GO:0002376	immune system process	inferred from electronic annotation	NM_010389	GO:0005622	intracellular	inferred from direct assay	ENSMUST00000095342	GO:0005515	protein binding	inferred from electronic annotation
TC1700002781.mm.1	4.63	0.018236	2.09	0.036585	5.12	0.026051		TC1700002781.mm.1	H2-Ab1	histocompatibility 2, class II antigen A, beta 1	+	NM_207105	chr17	34263209 - 34269418	Complex		34263209	34269418	70	17 B1|17 17.98 cM	14961	NM_207105	RefSeq	Mus musculus histocompatibility 2, class II antigen A, beta 1 (H2-Ab1), mRNA.	chr17	100	100	0		0	NM_207105	P14483	NM_207105	Mm.254067	bladder| blood| bone marrow| embryonic tissue| heart| intestine| joint| kidney| liver| lung| lymph node| mammary gland| pancreas| pineal gland| salivary gland| skin| spleen| stomach| sympathetic ganglion| testis| thymus| tongue| gastrula| organogenesis| fetus| neonate| juvenile| adult	NM_207105	GO:0002344	B cell affinity maturation	inferred from direct assay	NM_207105	GO:0005622	intracellular	inferred from direct assay	NM_207105	GO:0005515	protein binding	inferred from physical interaction
TC1700000938.mm.1	6.3	0.040158	3.92	0.000667	9.13	0.032417		TC1700000938.mm.1	Treml1	triggering receptor expressed on myeloid cells-like 1	+	NM_001289451	chr17	48359916 - 48367176	Complex		48359916	48367176	114	17 C|17	71326	NM_001289451	RefSeq	Mus musculus triggering receptor expressed on myeloid cells-like 1 (Treml1), transcript variant 2, mRNA.	chr17	100	100	0		0	NM_001289451	Q8K558	NM_001289451	Mm.90177	bone| heart| inner ear| mammary gland| stomach| fetus| juvenile| adult	NM_001289451	GO:0009968	negative regulation of signal transduction	traceable author statement	NM_001289451	GO:0005737	cytoplasm	inferred from electronic annotation	NM_001289451	GO:0004872	receptor activity	traceable author statement
TC1700001905.mm.1	4.67	0.006284	3.56	0.004648	3.18	0.013179		TC1700001905.mm.1	H2-Aa	histocompatibility 2, class II antigen A, alpha	-	NM_010378	chr17	34282744 - 34287827	Complex		34282744	34287827	140	17 B1|17 17.98 cM	14960	NM_010378	RefSeq	Mus musculus histocompatibility 2, class II antigen A, alpha (H2-Aa), mRNA.	chr17	100	100	0		0	NM_010378	P14434	NM_010378	Mm.235338	blood| bone marrow| brain| embryonic tissue| eye| heart| intestine| joint| kidney| liver| lung| lymph node| mammary gland| muscle| pancreas| pineal gland| pituitary gland| prostate| salivary gland| skin| spleen| stomach| thymus| tongue| uterus| organogenesis| fetus| neonate| juvenile| adult	NM_010378	GO:0002376	immune system process	inferred from electronic annotation	NM_010378	GO:0005764	lysosome	inferred from direct assay	NM_010378	GO:0005515	protein binding	inferred from physical interaction
TC1700001942.mm.1	7.19	0.010313	7.37	0.001704	8.75	0.015864		TC1700001942.mm.1	G6b	immunoreceptor tyrosine-based inhibitory motif (ITIM) containing platelet receptor	-	NM_001033221	chr17	35062693 - 35066184	Coding		35062693	35066184	70	17 B1|17	106722	NM_001033221	RefSeq	Mus musculus immunoreceptor tyrosine-based inhibitory motif (ITIM) containing platelet receptor (G6b), transcript variant 2, mRNA.	chr17	100	100	0		0	NM_001033221	D7PDD4	NM_001033221	Mm.390956	bone| ovary| unfertilized ovum| fetus| adult	NM_001033221	GO:0007229	integrin-mediated signaling pathway	inferred from mutant phenotype	NM_001033221	GO:0005886	plasma membrane	not recorded	NM_001033221	GO:0003674	molecular_function	no biological data available
TC1700002822.mm.1	2.8	0.000395	2.04	0.000734	2.6	0.000281		TC1700002822.mm.1	H2-T22	histocompatibility 2, T region locus 22	-	NM_010397	chr17	36037128 - 36042747	Complex		36037128	36042747	159	17 B1|17 18.87 cM	15039	NM_010397	RefSeq	Mus musculus histocompatibility 2, T region locus 22 (H2-T22), mRNA.	chr17	100	100	0		0	NM_010397	A7VMS4	NM_010397	Mm.195061	bone| bone marrow| brain| connective tissue| embryonic tissue| extraembryonic tissue| eye| heart| intestine| joint| kidney| liver| lung| mammary gland| muscle| pancreas| salivary gland| skin| spinal cord| spleen| thymus| cleavage| organogenesis| fetus| neonate| juvenile| adult	NM_010397	GO:0002474	antigen processing and presentation of peptide antigen via MHC class I	not recorded	NM_010397	GO:0005886	plasma membrane	not recorded	NM_010397	GO:0005102	receptor binding	not recorded
TC1700002227.mm.1	4.82	0.000564	7.12	0.000661	4.55	0.007253		TC1700002227.mm.1	Tspo2	translocator protein 2	-	NM_027292	chr17	48447956 - 48451522	Complex		48447956	48451522	147	17 C|17	70026	NM_027292	RefSeq	Mus musculus translocator protein 2 (Tspo2), mRNA.	chr17	100	100	0		0	NM_027292	Q9CRZ8	NM_027292	Mm.22613	bone| embryonic tissue| joint| liver| lung| fetus| neonate| juvenile| adult	NM_027292	GO:0006810	transport	inferred from electronic annotation	NM_027292	GO:0005783	endoplasmic reticulum	inferred from direct assay	NM_027292	GO:0015485	cholesterol binding	inferred from direct assay
TC1800000550.mm.1	2.14	0.013527	3.64	7e-06	2.92	0.012058		TC1800000550.mm.1	Redrum	Redrum, erythroid developmental long intergenic non-protein coding transcript	+	NR_040338	chr18	54422295 - 54453294	NonCoding		54422295	54453294	50	18|18	77433	NR_040338	RefSeq	Mus musculus Redrum, erythroid developmental long intergenic non-protein coding transcript (Redrum), long non-coding RNA.	chr18	100	100	0		0			NR_040338	Mm.159919	bone| embryonic tissue| inner ear| liver| spleen| fetus| neonate| adult
TC1800000617.mm.1	11.13	0.011334	5.36	0.024055	5.33	0.029472		TC1800000617.mm.1	Cd74	CD74 antigen (invariant polypeptide of major histocompatibility complex, class II antigen-associated)	+	NM_001042605	chr18	60803848 - 60812652	Complex		60803848	60812652	120	18 E1|18 34.41 cM	16149	NM_001042605	RefSeq	Mus musculus CD74 antigen (invariant polypeptide of major histocompatibility complex, class II antigen-associated) (Cd74), transcript variant 1, mRNA.	chr18	100	100	0		0	NM_001042605	P04441	NM_001042605	Mm.439737	bladder| blood| brain| embryonic tissue| extraembryonic tissue| eye| heart| intestine| joint| kidney| liver| lung| mammary gland| muscle| pancreas| pineal gland| prostate| salivary gland| skin| spleen| stomach| testis| thymus| uterus| organogenesis| fetus| neonate| juvenile| adult					NM_001042605	GO:0005622	intracellular	inferred from mutant phenotype	NM_001042605	GO:0001540	beta-amyloid binding	not recorded
TC1800000800.mm.1	8.75	0.033887	11.26	0.00119	25.29	0.013875		TC1800000800.mm.1	Gm26202	predicted gene, 26202	+	ENSMUST00000082910	chr18	75001880 - 75001944	NonCoding		75001880	75001944	30			ENSMUST00000082910	ENSEMBL	ncrna:known chromosome:GRCm38:18:75001880:75001944:1 gene:ENSMUSG00000064844 gene_biotype:snoRNA transcript_biotype:snoRNA	chr18	100	100	0		0
TC1900000147.mm.1	9.35	0.008098	9.05	0.002058	4.42	0.022846		TC1900000147.mm.1			+		chr19	8019559 - 8020611	NonCoding		8019559	8020611	30			KnowTID_00004047	Luo lincRNA	Non-coding transcript identified by Luo, et al.	chr19	100	100	0		0
TC1900000381.mm.1	2.31	0.020453	3.73	0.005291	3.28	0.014111		TC1900000381.mm.1	Sarnp	SAP domain containing ribonucleoprotein	+	ENSMUST00000056396	chr19	23675844 - 23676712	Pseudogene		23675844	23676712	30	10|10 C1	66118	ENSMUST00000056396	ENSEMBL	ensembl:known chromosome:GRCm38:19:23675844:23676712:1 gene:ENSMUSG00000051255 gene_biotype:protein_coding transcript_biotype:protein_coding	chr19	100	100	0		0	ENSMUST00000056396	Q9D1J3	ENSMUST00000056396	Mm.351579	bone marrow| brain| connective tissue| dorsal root ganglion| embryonic tissue| extraembryonic tissue| eye| fertilized ovum| heart| intestine| joint| kidney| liver| lung| lymph node| mammary gland| muscle| ovary| pancreas| pituitary gland| prostate| skin| spinal cord| spleen| stomach| testis| thymus| tongue| uterus|oocyte| zygote| cleavage| morula| blastocyst| egg cylinder| gastrula| organogenesis…	ENSMUST00000056396	GO:0000122	negative regulation of transcription from RNA polymerase II promoter	inferred from direct assay	ENSMUST00000056396	GO:0000346	transcription export complex	not recorded	ENSMUST00000056396	GO:0000978	RNA polymerase II core promoter proximal region sequence-specific DNA binding	inferred from direct assay
TC1900001484.mm.1	4.55	0.007698	2.57	0.013397	4.3	0.01962		TC1900001484.mm.1	Pdlim1	PDZ and LIM domain 1 (elfin)	-	NM_016861	chr19	40221173 - 40271842	Complex		40221173	40271842	153	19|19 D1	54132	NM_016861	RefSeq	Mus musculus PDZ and LIM domain 1 (elfin) (Pdlim1), mRNA.	chr19	100	100	0		0	NM_016861	O70400	NM_016861	Mm.5567	adipose tissue| bladder| bone| bone marrow| brain| connective tissue| dorsal root ganglion| embryonic tissue| extraembryonic tissue| eye| fertilized ovum| heart| inner ear| intestine| joint| kidney| liver| lung| mammary gland| muscle| ovary| pancreas| pituitary gland| salivary gland| skin| spleen| stomach| testis| thymus| tongue|oocyte| unfertilized ovum| zygote| cleavage| morula| blastocyst| egg…	NM_016861	GO:0006355	regulation of transcription, DNA-templated	inferred from direct assay	NM_016861	GO:0005667	transcription factor complex	inferred from direct assay	NM_016861	GO:0003713	transcription coactivator activity	inferred from direct assay
TC1900001720.mm.1	2.56	0.018019	2.37	0.000378	3.22	0.003906		TC1900001720.mm.1			-		chr19	58134042 - 58136613	NonCoding		58134042	58136613	30			NONMMUT035241	NONCODE	Non-coding transcript identified by NONCODE: Linc	chr19	100	100	0		0
TC4_GL456350_random00000003.mm.1	7.67	0.014866	9.24	0.003932	11.91	0.003628		TC4_GL456350_random00000003.mm.1			+		chr4_GL456350_random	88078 - 88342	NonCoding		88078	88342	30			uc029vcd.1	UCSC Genes	Mus musculus 10 days neonate cerebellum cDNA, RIKEN full-length enriched library, clone:B930035O06 product:unclassifiable, full insert sequence.	chr4_GL456350_random	100	100	0		0
TC4_GL456350_random00000005.mm.1	8.85	0.015563	9.43	0.001801	10.21	0.002878		TC4_GL456350_random00000005.mm.1			-		chr4_GL456350_random	23206 - 23528	NonCoding		23206	23528	30			uc029vbq.1	UCSC Genes	Mus musculus adult male aorta and vein cDNA, RIKEN full-length enriched library, clone:A530086H01 product:unclassifiable, full insert sequence.	chr4_GL456350_random	100	100	0		0
TC4_GL456350_random00000006.mm.1	4.04	0.000512	4.46	0.001976	3.15	0.002323		TC4_GL456350_random00000006.mm.1			-		chr4_GL456350_random	23801 - 25222	Coding		23801	25222	30			ENSMUST00000179935	ENSEMBL	ensembl:known scaffold:GRCm38:GL456350.1:23801:25222:-1 gene:ENSMUSG00000094576 gene_biotype:protein_coding transcript_biotype:protein_coding	chr4_GL456350_random	100	100	0		0	ENSMUST00000179935	Q6PCY5
TC4_GL456350_random00000007.mm.1	2.83	0.011189	3.68	0.00173	4.86	0.001736		TC4_GL456350_random00000007.mm.1			-		chr4_GL456350_random	26214 - 60779	Complex		26214	60779	70			ENSMUST00000115902	ENSEMBL	ensembl:novel scaffold:GRCm38:GL456350.1:26556:27953:-1 gene:ENSMUSG00000079764 gene_biotype:pseudogene transcript_biotype:pseudogene	chr4_GL456350_random	100	100	0		0
TC4_JH584293_random00000005.mm.1	7.67	0.014866	9.24	0.003932	11.91	0.003628		TC4_JH584293_random00000005.mm.1			+		chr4_JH584293_random	147821 - 148085	NonCoding		147821	148085	30			uc029ved.1	UCSC Genes	Mus musculus 10 days neonate cerebellum cDNA, RIKEN full-length enriched library, clone:B930035O06 product:unclassifiable, full insert sequence.	chr4_JH584293_random	100	100	0		0
TC4_JH584293_random00000010.mm.1	7.67	0.014866	9.24	0.003932	11.91	0.003628		TC4_JH584293_random00000010.mm.1			-		chr4_JH584293_random	82967 - 83231	NonCoding		82967	83231	30			uc029vdh.1	UCSC Genes	Mus musculus 10 days neonate cerebellum cDNA, RIKEN full-length enriched library, clone:B930035O06 product:unclassifiable, full insert sequence.	chr4_JH584293_random	100	100	0		0
TC4_JH584293_random00000011.mm.1	3.23	0.003775	3.64	0.009397	2.65	0.007085		TC4_JH584293_random00000011.mm.1			-		chr4_JH584293_random	83395 - 84475	Coding		83395	84475	30			ENSMUST00000178837	ENSEMBL	ensembl:novel scaffold:GRCm38:JH584293.1:83395:84475:-1 gene:ENSMUSG00000095755 gene_biotype:protein_coding transcript_biotype:protein_coding	chr4_JH584293_random	100	100	0		0	ENSMUST00000178837	E9Q1I1
TC4_JH584293_random00000012.mm.1	3.16	0.010648	4.09	0.002638	4.99	0.002467		TC4_JH584293_random00000012.mm.1	Gm7819	predicted gene 7819	-	uc029vdi.1	chr4_JH584293_random	85974 - 120530	Coding		85974	120530	70	4 A5|4	665845	uc029vdi.1	UCSC Genes	SubName: Full=4933409K07Rik protein; SubName: Full=Protein LOC101055653;	chr4_JH584293_random	100	100	0		0
TC4_JH584294_random00000004.mm.1	2.38	0.003975	3.36	0.020052	3.63	0.014		TC4_JH584294_random00000004.mm.1	4930578G10Rik	RIKEN cDNA 4930578G10 gene	+	uc029vff.1	chr4_JH584294_random	83356 - 115083	NonCoding		83356	115083	40	4 A5|4	75952	uc029vff.1	UCSC Genes	Mus musculus adult male testis cDNA, RIKEN full-length enriched library, clone:1700031K17 product:unclassifiable, full insert sequence.	chr4_JH584294_random	100	100	0		0
TC0100000008.mm.1	-3.4	0.011673	-5.37	0.003799	-2.5	0.046961		TC0100000008.mm.1	Gm22307	predicted gene, 22307	+	ENSMUST00000180019	chr1	4529017 - 4529123	NonCoding		4529017	4529123	30			ENSMUST00000180019	ENSEMBL	ncrna:known chromosome:GRCm38:1:4529017:4529123:1 gene:ENSMUSG00000096126 gene_biotype:snRNA transcript_biotype:snRNA	chr1	100	100	0		0
TC0100000059.mm.1	-2.64	0.012289	-2.42	0.021884	-2.27	0.023824		TC0100000059.mm.1	Gm22633	predicted gene, 22633	+	ENSMUST00000179834	chr1	12374936 - 12375042	NonCoding		12374936	12375042	30			ENSMUST00000179834	ENSEMBL	ncrna:known chromosome:GRCm38:1:12374936:12375042:1 gene:ENSMUSG00000093864 gene_biotype:snRNA transcript_biotype:snRNA	chr1	100	100	0		0
TC0100000237.mm.1	-32.5	4.6e-05	-18.01	0.000932	-9.24	0.013475		TC0100000237.mm.1	Hs6st1	heparan sulfate 6-O-sulfotransferase 1	+	NM_015818	chr1	36068400 - 36106446	Coding		36068400	36106446	30	1 B|1	50785	NM_015818	RefSeq	Mus musculus heparan sulfate 6-O-sulfotransferase 1 (Hs6st1), mRNA.	chr1	100	100	0		0	NM_015818	Q9QYK5	NM_015818	Mm.213566	adrenal gland| bone| bone marrow| brain| embryonic tissue| extraembryonic tissue| eye| heart| intestine| kidney| liver| lung| lymph node| mammary gland| nasopharynx| ovary| pancreas| pituitary gland| skin| spinal cord| spleen| thymus| thyroid| tongue| uterus|oocyte| cleavage| morula| blastocyst| organogenesis| fetus| neonate| juvenile| adult	NM_015818	GO:0001525	angiogenesis	inferred from mutant phenotype	NM_015818	GO:0016020	membrane	inferred from electronic annotation	NM_015818	GO:0001517	N-acetylglucosamine 6-O-sulfotransferase activity	inferred from electronic annotation
TC0100000437.mm.1	-3.1	0.002753	-2.21	0.008588	-2.61	0.005534		TC0100000437.mm.1	Gm6917	predicted gene 6917	+	ENSMUST00000081455	chr1	58646608 - 58648317	Coding		58646608	58648317	30	13 B3|13	628794	ENSMUST00000081455	ENSEMBL	havana:known chromosome:GRCm38:1:58646688:58647239:1 gene:ENSMUSG00000059647 gene_biotype:pseudogene transcript_biotype:processed_pseudogene	chr1	100	100	0		0	ENSMUST00000081455	Q9DCC5	ENSMUST00000081455	Mm.280968	bone marrow| brain| dorsal root ganglion| embryonic tissue| extraembryonic tissue| eye| kidney| liver| lung| mammary gland| pancreas| skin| spinal cord| sympathetic ganglion| testis| thymus| cleavage| blastocyst| egg cylinder| gastrula| organogenesis| fetus| neonate| juvenile| adult	ENSMUST00000081455	GO:0045892	negative regulation of transcription, DNA-templated	inferred from direct assay	ENSMUST00000081455	GO:0000785	chromatin	inferred from direct assay	ENSMUST00000081455	GO:0005515	protein binding	inferred from physical interaction	ENSMUST00000081455	GenMAPP
TC0100000898.mm.1	-8.97	3.2e-05	-2.8	0.005079	-2.78	0.016724		TC0100000898.mm.1	Asb1	ankyrin repeat and SOCS box-containing 1	+	NM_001039126	chr1	91540565 - 91559590	Complex		91540565	91559590	100	1 D|1 46.19 cM	65247	NM_001039126	RefSeq	Mus musculus ankyrin repeat and SOCS box-containing 1 (Asb1), transcript variant 1, mRNA.	chr1	100	100	0		0	NM_001039126	Q9WV74	NM_001039126	Mm.234152	bladder| blood| bone marrow| brain| embryonic tissue| extraembryonic tissue| eye| heart| inner ear| liver| lung| mammary gland| molar| ovary| pancreas| skin| spleen| testis| thymus| gastrula| organogenesis| fetus| neonate| juvenile| adult	NM_001039126	GO:0007275	multicellular organismal development	inferred from electronic annotation	NM_001039126	GO:0005575	cellular_component	no biological data available	NM_001039126	GO:0003674	molecular_function	no biological data available
TC0100001010.mm.1	-2.41	0.027418	-2.95	0.002716	-2.07	0.036668		TC0100001010.mm.1	Gm10193	predicted gene 10193	+	XM_001478111	chr1	105764444 - 105764674	Coding		105764444	105764674	30	1 E2.1|1	100042023	XM_001478111	RefSeq	PREDICTED: Mus musculus predicted gene 10193 (Gm10193), mRNA.	chr1	100	100	0		0
TC0100001599.mm.1	-4.72	3e-06	-4.21	0.000599	-4.45	0.000475		TC0100001599.mm.1	Tma7-ps	translational machinery associated 7 homolog (S. cerevisiae), pseudogene	+	ENSMUST00000118448	chr1	171711077 - 171711500	Complex		171711077	171711500	30			ENSMUST00000118448	ENSEMBL	havana:known chromosome:GRCm38:1:171711088:171711282:1 gene:ENSMUSG00000059058 gene_biotype:pseudogene transcript_biotype:processed_pseudogene	chr1	100	100	0		0
TC0100001644.mm.1	-10.08	0.003	-3.98	0.027718	-9.21	0.039784		TC0100001644.mm.1	Spta1	spectrin alpha, erythrocytic 1	+	NM_011465	chr1	174172776 - 174248450	Complex		174172776	174248450	540	1 H3|1 80.97 cM	20739	NM_011465	RefSeq	Mus musculus spectrin alpha, erythrocytic 1 (Spta1), mRNA.	chr1	100	100	0		0	NM_011465	P08032	NM_011465	Mm.200611	embryonic tissue| heart| lymph node| spleen| testis| gastrula| organogenesis| fetus| neonate| juvenile| adult	NM_011465	GO:0002260	lymphocyte homeostasis	inferred from mutant phenotype	NM_011465	GO:0005737	cytoplasm	inferred from electronic annotation	NM_011465	GO:0003779	actin binding	inferred from electronic annotation
TC0100001657.mm.1	-2.29	0.00592	-2.4	0.001484	-2.03	0.027147		TC0100001657.mm.1	Gm23805	predicted gene, 23805	+	ENSMUST00000180129	chr1	175904545 - 175904651	NonCoding		175904545	175904651	30			ENSMUST00000180129	ENSEMBL	ncrna:known chromosome:GRCm38:1:175904545:175904651:1 gene:ENSMUSG00000094820 gene_biotype:snRNA transcript_biotype:snRNA	chr1	100	100	0		0
TC0100002063.mm.1	-5.43	0.001116	-4.32	0.004077	-6.04	0.002759		TC0100002063.mm.1	Ogfrl1	opioid growth factor receptor-like 1	-	NM_001081079	chr1	23366424 - 23383175	Complex		23366424	23383175	100	1 A5|1	70155	NM_001081079	RefSeq	Mus musculus opioid growth factor receptor-like 1 (Ogfrl1), mRNA.	chr1	100	100	0		0	NM_001081079	Q8VE52	NM_001081079	Mm.28013	bladder| blood| bone marrow| brain| dorsal root ganglion| embryonic tissue| eye| intestine| kidney| liver| lung| lymph node| mammary gland| molar| ovary| pancreas| pineal gland| skin| spinal cord| spleen| stomach| thymus|oocyte| blastocyst| gastrula| organogenesis| fetus| neonate| juvenile| adult	NM_001081079	GO:0008150	biological_process	no biological data available	NM_001081079	GO:0016020	membrane	inferred from electronic annotation	NM_001081079	GO:0004872	receptor activity	inferred from electronic annotation
TC0100003108.mm.1	-3.68	0.003032	-2.51	0.027736	-2.02	0.030451		TC0100003108.mm.1	Tmem183a	transmembrane protein 183A	-	NM_001042485	chr1	134346097 - 134361999	Coding		134346097	134361999	100	1 E4|1	57439	NM_001042485	RefSeq	Mus musculus transmembrane protein 183A (Tmem183a), transcript variant 2, mRNA.	chr1	100	100	0		0	NM_001042485	Q9JJB9	NM_001042485	Mm.393140	bladder| blood| bone marrow| brain| embryonic tissue| extraembryonic tissue| eye| heart| inner ear| intestine| joint| kidney| liver| lung| lymph node| mammary gland| nasopharynx| ovary| pancreas| pituitary gland| prostate| salivary gland| skin| spinal cord| spleen| stomach| testis| thymus| uterus|oocyte| cleavage| blastocyst| gastrula| organogenesis| fetus| neonate| juvenile| adult	NM_001042485	GO:0008150	biological_process	no biological data available	NM_001042485	GO:0016020	membrane	inferred from electronic annotation	NM_001042485	GO:0003674	molecular_function	no biological data available
TC0100003267.mm.1	-4.15	0.000361	-5.19	0.000565	-3.72	0.04992		TC0100003267.mm.1	Gm7278	predicted gene 7278	-	ENSMUST00000119836	chr1	152729159 - 152730559	Pseudogene		152729159	152730559	30			ENSMUST00000119836	ENSEMBL	havana:known chromosome:GRCm38:1:152729159:152730559:-1 gene:ENSMUSG00000080950 gene_biotype:pseudogene transcript_biotype:processed_pseudogene	chr1	100	100	0		0
TC0100003508.mm.1	-3.3	0.002886	-2.3	0.000305	-3.07	0.013306		TC0100003508.mm.1	Uhmk1	U2AF homology motif (UHM) kinase 1	-	NM_010633	chr1	170193420 - 170215397	Complex		170193420	170215397	110	1|1 H2	16589	NM_010633	RefSeq	Mus musculus U2AF homology motif (UHM) kinase 1 (Uhmk1), mRNA.	chr1	100	100	0		0	NM_010633	P97343	NM_010633	Mm.389214	brain| embryonic tissue| eye| kidney| mammary gland| spinal cord| testis| cleavage| organogenesis| fetus| juvenile| adult	NM_010633	GO:0006468	protein phosphorylation	traceable author statement	NM_010633	GO:0005634	nucleus	not recorded	NM_010633	GO:0000166	nucleotide binding	inferred from electronic annotation	NM_010633	GenMAPP
TC0100003531.mm.1	-6.55	0.013816	-7.21	0.000567	-7.31	0.039765		TC0100003531.mm.1	Pcp4l1	Purkinje cell protein 4-like 1	-	NM_025557	chr1	171173262 - 171197035	Coding		171173262	171197035	30	1 H3|1	66425	NM_025557	RefSeq	Mus musculus Purkinje cell protein 4-like 1 (Pcp4l1), mRNA.	chr1	100	100	0		0	NM_025557	Q6W8Q3	NM_025557	Mm.482117	bladder| bone marrow| brain| embryonic tissue| eye| heart| intestine| joint| kidney| liver| nasopharynx| olfactory mucosa| pineal gland| prostate| salivary gland| spleen| stomach| thyroid| tongue| cleavage| fetus| neonate| juvenile| adult	NM_025557	GO:0008150	biological_process	no biological data available	NM_025557	GO:0005575	cellular_component	no biological data available	NM_025557	GO:0003674	molecular_function	no biological data available
TC0100003625.mm.1	-2.98	0.042905	-5.47	0.003551	-5.27	0.023105		TC0100003625.mm.1	Hmga2-ps1	high mobility group AT-hook 2, pseudogene 1	-	NR_037996	chr1	176834624 - 176836133	Complex		176834624	176836133	30	1|1	15365	NR_037996	RefSeq	Mus musculus high mobility group AT-hook 2, pseudogene 1 (Hmga2-ps1), non-coding RNA.	chr1	100	100	0		0			NR_037996	Mm.441435	eye| intestine| mammary gland| ovary| skin| testis|oocyte| juvenile| adult
TC0100003780.mm.1	-5.41	0.009692	-4.65	0.001519	-6.26	0.011225		TC0100003780.mm.1	Gm3837	predicted gene 3837	-	XM_001478256	chr1	189277308 - 189277823	Coding		189277308	189277823	30	1 H6|1	100042424	XM_001478256	RefSeq	PREDICTED: Mus musculus predicted gene 3837 (Gm3837), mRNA.	chr1	100	100	0		0	XM_001478256	P56812				XM_001478256	GO:0006915	apoptotic process	inferred from electronic annotation	XM_001478256	GO:0005634	nucleus	inferred from electronic annotation	XM_001478256	GO:0003677	DNA binding	inferred from electronic annotation
TC0200000068.mm.1	-8.46	0.001031	-4.38	0.009893	-2.6	0.036691		TC0200000068.mm.1			+		chr2	7405408 - 7407130	NonCoding		7405408	7407130	30			KnowTID_00004297	Luo lincRNA	Non-coding transcript identified by Luo, et al.	chr2	100	100	0		0
TC0200000366.mm.1	-4.45	0.00073	-3.99	0.00431	-2.47	0.032699		TC0200000366.mm.1	Gm13422	predicted gene 13422	+	ENSMUST00000118834	chr2	23235236 - 23235739	Complex		23235236	23235739	30			ENSMUST00000118834	ENSEMBL	havana:known chromosome:GRCm38:2:23235236:23235739:1 gene:ENSMUSG00000084098 gene_biotype:pseudogene transcript_biotype:processed_pseudogene	chr2	100	100	0		0
TC0200002492.mm.1	-7.85	0.006316	-5.66	0.000527	-2.95	0.016683		TC0200002492.mm.1			+		chr2	163624657 - 163642508	NonCoding		163624657	163642508	30			XR_140538	MGI/Jackson Lab	[retired] PREDICTED: uncharacterized LOC100862033 (LOC100862033), miscRNA.	chr2	100	100	0		0
TC0200002494.mm.1	-3.49	4.1e-05	-3.41	0.004944	-2.45	0.006513		TC0200002494.mm.1	Pkig	protein kinase inhibitor, gamma	+	NM_001039390	chr2	163658386 - 163726158	Complex		163658386	163726158	130	2 H3|2 84.4 cM	18769	NM_001039390	RefSeq	Mus musculus protein kinase inhibitor, gamma (Pkig), transcript variant 2, mRNA.	chr2	100	100	0		0	NM_001039390	O70139	NM_001039390	Mm.10091	blood| bone| bone marrow| brain| embryonic tissue| extraembryonic tissue| eye| heart| inner ear| intestine| joint| kidney| liver| lung| lymph node| mammary gland| muscle| ovary| pancreas| skin| spinal cord| spleen| stomach| sympathetic ganglion| testis| thymus| thyroid| tongue| egg cylinder| gastrula| organogenesis| fetus| neonate| juvenile| adult	NM_001039390	GO:0000122	negative regulation of transcription from RNA polymerase II promoter	inferred from direct assay	NM_001039390	GO:0005575	cellular_component	no biological data available	NM_001039390	GO:0004860	protein kinase inhibitor activity	inferred from electronic annotation	NM_001039390	GenMAPP
TC0200002747.mm.1	-4.01	0.00101	-6.41	0.00347	-3.28	0.021362		TC0200002747.mm.1	Gm14414	predicted gene 14414	+	ENSMUST00000120833	chr2	177460275 - 177460847	Pseudogene		177460275	177460847	30			ENSMUST00000120833	ENSEMBL	havana:known chromosome:GRCm38:2:177460275:177460847:1 gene:ENSMUSG00000083619 gene_biotype:pseudogene transcript_biotype:processed_pseudogene	chr2	100	100	0		0
TC0200002752.mm.1	-4.45	0.001191	-6.68	0.003443	-3.26	0.012729		TC0200002752.mm.1	Gm14323	predicted gene 14323	+	ENSMUST00000122418	chr2	177892638 - 177893264	Pseudogene		177892638	177893264	30			ENSMUST00000122418	ENSEMBL	havana:known chromosome:GRCm38:2:177892638:177893264:1 gene:ENSMUSG00000082901 gene_biotype:pseudogene transcript_biotype:processed_pseudogene	chr2	100	100	0		0
TC0200002998.mm.1	-11.35	0.000402	-16.11	0.001018	-7.66	0.002462		TC0200002998.mm.1	Gm13268	predicted gene 13268	-	ENSMUST00000093758	chr2	14626880 - 14627323	Pseudogene		14626880	14627323	30			ENSMUST00000093758	ENSEMBL	[retired] cdna:pseudogene chromosome:GRCm38:2:14626880:14627323:-1 gene:ENSMUSG00000070271 gene_biotype:pseudogene transcript_biotype:processed_pseudogene	chr2	100	100	0		0
TC0200003174.mm.1	-7.96	9e-06	-4.02	0.00153	-3.87	0.003161		TC0200003174.mm.1	Ubac1	ubiquitin associated domain containing 1	-	NM_133835	chr2	25996958 - 26021760	Complex		25996958	26021760	259	2 A3|2	98766	NM_133835	RefSeq	Mus musculus ubiquitin associated domain containing 1 (Ubac1), mRNA.	chr2	100	100	0		0	NM_133835	Q8VDI7	NM_133835	Mm.247824	bone| bone marrow| brain| connective tissue| embryonic tissue| eye| heart| inner ear| joint| kidney| liver| lung| lymph node| mammary gland| muscle| nasopharynx| ovary| pancreas| pituitary gland| prostate| skin| spinal cord| spleen| sympathetic ganglion| testis| thymus| thyroid| tongue| uterus| vagina|oocyte| blastocyst| gastrula| organogenesis| fetus| neonate| juvenile| adult	NM_133835	GO:0008150	biological_process	no biological data available	NM_133835	GO:0005737	cytoplasm	not recorded	NM_133835	GO:0003674	molecular_function	no biological data available
TC0200003175.mm.1	-37.01	0.000295	-20.62	0.001044	-9.66	0.001747		TC0200003175.mm.1			-		chr2	25999822 - 26003356	NonCoding		25999822	26003356	30			NONMMUT036279	NONCODE	Non-coding transcript identified by NONCODE: Sense No Exonic	chr2	100	100	0		0
TC0200003841.mm.1	-9.24	0.001417	-15.33	0.001635	-5.88	0.001898		TC0200003841.mm.1	Mir684-1	microRNA 684-1	-	NR_030454	chr2	80628705 - 80628790	Complex		80628705	80628790	30	2|2	735274	NR_030454	RefSeq	Mus musculus microRNA 684-1 (Mir684-1), microRNA.	chr2	100	100	0		0
TC0200004296.mm.1	-4.97	0.018301	-3.8	0.021618	-2.53	0.0172		TC0200004296.mm.1	Rpl35a-ps4	ribosomal protein 35A, pseudogene 4	-	ENSMUST00000121779	chr2	108874926 - 108875258	Pseudogene		108874926	108875258	30			ENSMUST00000121779	ENSEMBL	ensembl_havana_transcript:known chromosome:GRCm38:2:108874926:108875258:-1 gene:ENSMUSG00000083424 gene_biotype:pseudogene transcript_biotype:processed_pseudogene	chr2	100	100	0		0
TC0200004413.mm.1	-3.1	8.3e-05	-2.91	1.2e-05	-2.73	0.00536		TC0200004413.mm.1	Srp14	signal recognition particle 14	-	NM_009273	chr2	118475843 - 118479711	Complex		118475843	118479711	99	2 E5|2	20813	NM_009273	RefSeq	Mus musculus signal recognition particle 14 (Srp14), mRNA.	chr2	100	100	0		0	NM_009273	P16254	NM_009273	Mm.363404	bladder| bone marrow| brain| connective tissue| embryonic tissue| epididymis| extraembryonic tissue| eye| fertilized ovum| heart| inner ear| intestine| joint| kidney| liver| lung| lymph node| mammary gland| muscle| ovary| oviduct| pancreas| pineal gland| pituitary gland| prostate| salivary gland| skin| spinal cord| spleen| stomach| testis| thymus| thyroid| tongue| uterus| vagina|oocyte| unfertili…	NM_009273	GO:0006614	SRP-dependent cotranslational protein targeting to membrane	inferred from electronic annotation	NM_009273	GO:0005634	nucleus	not recorded	NM_009273	GO:0003723	RNA binding	inferred from electronic annotation	NM_009273	GenMAPP
TC0200004649.mm.1	-7.13	0.000231	-4.75	0.015137	-2.12	0.026731		TC0200004649.mm.1	1700037H04Rik	RIKEN cDNA 1700037H04 gene	-	NM_026091	chr2	131146315 - 131160081	Complex		131146315	131160081	110	2|2 F3	67326	NM_026091	RefSeq	Mus musculus RIKEN cDNA 1700037H04 gene (1700037H04Rik), mRNA.	chr2	100	100	0		0	NM_026091	Q9D1K7	NM_026091	Mm.27711	bone| brain| connective tissue| embryonic tissue| extraembryonic tissue| eye| heart| inner ear| intestine| joint| kidney| liver| lung| lymph node| mammary gland| muscle| ovary| pancreas| pituitary gland| salivary gland| skin| spleen| stomach| sympathetic ganglion| testis| thymus| thyroid|oocyte| cleavage| gastrula| organogenesis| fetus| neonate| juvenile| adult	NM_026091	GO:0008150	biological_process	no biological data available	NM_026091	GO:0005575	cellular_component	no biological data available	NM_026091	GO:0003674	molecular_function	no biological data available
TC0200005019.mm.1	-4.1	0.000864	-3.82	0.006764	-5.1	0.00321		TC0200005019.mm.1			-		chr2	157356092 - 157363921	NonCoding		157356092	157363921	30			NONMMUT040821	NONCODE	Non-coding transcript identified by NONCODE: Linc	chr2	100	100	0		0
TC0200005020.mm.1	-3.12	0.027575	-3.85	0.01112	-2.31	0.024843		TC0200005020.mm.1	Gm14279	predicted gene 14279	-	XM_003084518	chr2	157521696 - 157522028	Pseudogene		157521696	157522028	30	2|2	100046034	XM_003084518	RefSeq	[retired] PREDICTED: Mus musculus predicted gene 14279 (Gm14279), mRNA.	chr2	100	100	0		0
TC0200005036.mm.1	-7.11	3.9e-05	-7.71	0.001083	-8.04	5.9e-05		TC0200005036.mm.1	Gm14200	predicted gene 14200	-	ENSMUST00000122256	chr2	158468169 - 158468360	Pseudogene		158468169	158468360	30			ENSMUST00000122256	ENSEMBL	havana:known chromosome:GRCm38:2:158468169:158468360:-1 gene:ENSMUSG00000081800 gene_biotype:pseudogene transcript_biotype:processed_pseudogene	chr2	100	100	0		0
TC0200005300.mm.1	-5.07	0.002342	-3.82	0.001198	-3.02	0.041644		TC0200005300.mm.1	Gm14337	predicted gene 14337	-	ENSMUST00000120437	chr2	173984482 - 173984691	Complex		173984482	173984691	30			ENSMUST00000120437	ENSEMBL	havana:known chromosome:GRCm38:2:173984482:173984691:-1 gene:ENSMUSG00000081700 gene_biotype:pseudogene transcript_biotype:processed_pseudogene	chr2	100	100	0		0
TC0200005343.mm.1	-4.6	0.000734	-7.75	0.004454	-3.15	0.025367		TC0200005343.mm.1	Rps8-ps2	ribosomal protein S8, pseudogene 2	-	ENSMUST00000118709	chr2	175804983 - 175805609	Pseudogene		175804983	175805609	30			ENSMUST00000118709	ENSEMBL	havana:known chromosome:GRCm38:2:175804983:175805606:-1 gene:ENSMUSG00000083481 gene_biotype:pseudogene transcript_biotype:processed_pseudogene	chr2	100	100	0		0
TC0300000094.mm.1	-3	0.011116	-2.82	0.001212	-2.81	8.1e-05		TC0300000094.mm.1	Gm5843	predicted gene 5843	+	ENSMUST00000121631	chr3	14722416 - 14729626	Pseudogene		14722416	14729626	40			ENSMUST00000121631	ENSEMBL	havana:known chromosome:GRCm38:3:14722416:14729626:1 gene:ENSMUSG00000084092 gene_biotype:pseudogene transcript_biotype:unprocessed_pseudogene	chr3	100	100	0		0
TC0300000872.mm.1	-6.91	3e-06	-10.42	0.000983	-7.49	0.000727		TC0300000872.mm.1	Gm15235	predicted gene 15235	+	ENSMUST00000118935	chr3	94589466 - 94589659	Pseudogene		94589466	94589659	30			ENSMUST00000118935	ENSEMBL	havana:known chromosome:GRCm38:3:94589466:94589659:1 gene:ENSMUSG00000081537 gene_biotype:pseudogene transcript_biotype:processed_pseudogene	chr3	100	100	0		0
TC0300000916.mm.1	-4.73	0.000574	-2.74	0.003234	-3.32	0.001395		TC0300000916.mm.1	Anp32e	acidic (leucine-rich) nuclear phosphoprotein 32 family, member E	+	NM_001253757	chr3	95929246 - 95947390	Complex		95929246	95947390	230	3 F2.1|3	66471	NM_001253757	RefSeq	Mus musculus acidic (leucine-rich) nuclear phosphoprotein 32 family, member E (Anp32e), transcript variant 2, mRNA.	chr3	100	100	0		0	NM_001253757	P97822	NM_001253757	Mm.218657	bladder| blood| bone| bone marrow| brain| connective tissue| dorsal root ganglion| embryonic tissue| extraembryonic tissue| eye| fertilized ovum| heart| inner ear| intestine| kidney| liver| lung| mammary gland| molar| muscle| nasopharynx| olfactory mucosa| ovary| pancreas| pituitary gland| prostate| salivary gland| skin| spinal cord| spleen| sympathetic ganglion| testis| thymus| thyroid| uterus| …	NM_001253757	GO:0016568	chromatin modification	inferred from electronic annotation	NM_001253757	GO:0005634	nucleus	inferred from direct assay	NM_001253757	GO:0019212	phosphatase inhibitor activity	inferred from direct assay
TC0300000935.mm.1	-3.33	0.003179	-2.99	0.040378	-2.05	0.017275		TC0300000935.mm.1	Hist2h2bb	histone cluster 2, H2bb	+	NM_175666	chr3	96269700 - 96279001	Coding		96269700	96279001	44	3 F1-F2|3	319189	NM_175666	RefSeq	Mus musculus histone cluster 2, H2bb (Hist2h2bb), mRNA.	chr3	100	100	0		0	NM_175666	Q64525	NM_175666	Mm.297655	mammary gland| adult	NM_175666	GO:0006334	nucleosome assembly	inferred from electronic annotation	NM_175666	GO:0005634	nucleus	not recorded	NM_175666	GO:0003677	DNA binding	inferred from electronic annotation
TC0300001390.mm.1	-2.15	0.025983	-2.56	0.004299	-2.13	0.023235		TC0300001390.mm.1	Gm26107	predicted gene, 26107	+	ENSMUST00000083972	chr3	137067892 - 137067998	NonCoding		137067892	137067998	30			ENSMUST00000083972	ENSEMBL	ncrna:known chromosome:GRCm38:3:137067892:137067998:1 gene:ENSMUSG00000065906 gene_biotype:snRNA transcript_biotype:snRNA	chr3	100	100	0		0
TC0300001667.mm.1	-4.34	0.002545	-3.15	0.011477	-3.66	0.003815		TC0300001667.mm.1	Car1	carbonic anhydrase 1	-	NM_001083957	chr3	14766214 - 14808368	Coding		14766214	14808368	100	3 A1|3 3.18 cM	12346	NM_001083957	RefSeq	Mus musculus carbonic anhydrase 1 (Car1), transcript variant 2, mRNA.	chr3	100	100	0		0	NM_001083957	P13634	NM_001083957	Mm.273195	bone marrow| inner ear| intestine| joint| kidney| liver| lung| lymph node| ovary| spleen| thymus| neonate| juvenile| adult	NM_001083957	GO:0006730	one-carbon metabolic process	inferred from electronic annotation	NM_001083957	GO:0005737	cytoplasm	inferred from electronic annotation	NM_001083957	GO:0004089	carbonate dehydratase activity	inferred from electronic annotation
TC0300001820.mm.1	-5.29	0.000221	-3.59	0.00354	-2.51	0.012633		TC0300001820.mm.1	Gm9791	predicted pseudogene 9791	-	ENSMUST00000060997	chr3	34004779 - 34005511	Pseudogene		34004779	34005511	30			ENSMUST00000060997	ENSEMBL	havana:known chromosome:GRCm38:3:34005017:34005463:-1 gene:ENSMUSG00000044434 gene_biotype:pseudogene transcript_biotype:processed_pseudogene	chr3	100	100	0		0	ENSMUST00000060997	J3QPI4				ENSMUST00000060997	GO:0006355	regulation of transcription, DNA-templated	inferred from electronic annotation					ENSMUST00000060997	GO:0003676	nucleic acid binding	inferred from electronic annotation
TC0300001856.mm.1	-5.01	0.00512	-2.38	0.008277	-2.52	0.047303		TC0300001856.mm.1	Ccna2	cyclin A2	-	NM_009828	chr3	36564865 - 36572150	Complex		36564865	36572150	148	3 B|3 17.67 cM	12428	NM_009828	RefSeq	Mus musculus cyclin A2 (Ccna2), mRNA.	chr3	100	100	0		0	NM_009828	P51943	NM_009828	Mm.4189	bladder| blood| bone| bone marrow| brain| connective tissue| dorsal root ganglion| embryonic tissue| extraembryonic tissue| eye| fertilized ovum| heart| inner ear| intestine| kidney| liver| lung| mammary gland| molar| muscle| nasopharynx| ovary| pancreas| pituitary gland| skin| spinal cord| spleen| stomach| testis| thymus| vagina|oocyte| zygote| cleavage| morula| blastocyst| gastrula| organogenes…	NM_009828	GO:0000079	regulation of cyclin-dependent protein serine/threonine kinase activity	inferred from electronic annotation	NM_009828	GO:0001939	female pronucleus	inferred from direct assay	NM_009828	GO:0005515	protein binding	inferred from physical interaction	NM_009828	GenMAPP
TC0300002263.mm.1	-2.82	0.006511	-4.73	0.010495	-2.99	0.044824		TC0300002263.mm.1	Rps3a1	ribosomal protein S3A1	-	NM_016959	chr3	86137940 - 86142702	Ribosomal		86137940	86142702	80	3 F1|3	20091	NM_016959	RefSeq	Mus musculus ribosomal protein S3A1 (Rps3a1), mRNA.	chr3	100	100	0		0	NM_016959	P97351	NM_016959	Mm.399829	adipose tissue| bladder| blood| bone| bone marrow| brain| connective tissue| dorsal root ganglion| embryonic tissue| extraembryonic tissue| eye| fertilized ovum| heart| inner ear| intestine| joint| kidney| liver| lung| lymph node| mammary gland| muscle| ovary| pancreas| pineal gland| pituitary gland| prostate| salivary gland| skin| spinal cord| spleen| stomach| sympathetic ganglion| testis| thymu…	NM_016959	GO:0002181	cytoplasmic translation	not recorded	NM_016959	GO:0005622	intracellular	inferred from electronic annotation	NM_016959	GO:0003735	structural constituent of ribosome	not recorded	NM_016959	GenMAPP
TC0300002561.mm.1	-3.14	0.007453	-2.43	0.000663	-2.98	0.005243		TC0300002561.mm.1	Hsd3b6	hydroxy-delta-5-steroid dehydrogenase, 3 beta- and steroid delta-isomerase 6	-	NM_013821	chr3	98805504 - 98814443	Coding		98805504	98814443	40	3 F2.2|3	15497	NM_013821	RefSeq	Mus musculus hydroxy-delta-5-steroid dehydrogenase, 3 beta- and steroid delta-isomerase 6 (Hsd3b6), mRNA.	chr3	100	100	0		0	NM_013821	O35469	NM_013821	Mm.14435	brain| embryonic tissue| eye| heart| testis| uterus| gastrula| organogenesis| fetus| adult	NM_013821	GO:0006694	steroid biosynthetic process	inferred from electronic annotation	NM_013821	GO:0005739	mitochondrion	inferred from electronic annotation	NM_013821	GO:0000252	C-3 sterol dehydrogenase (C-4 sterol decarboxylase) activity	inferred from electronic annotation	NM_013821	GenMAPP
TC0300002633.mm.1	-7.28	2e-06	-6.16	0.000188	-4.19	0.000203		TC0300002633.mm.1	Dclre1b	DNA cross-link repair 1B, PSO2 homolog (S. cerevisiae)	-	NM_001025312	chr3	103800605 - 103809444	Complex		103800605	103809444	142	3 F2.2|3	140917	NM_001025312	RefSeq	Mus musculus DNA cross-link repair 1B, PSO2 homolog (S. cerevisiae) (Dclre1b), transcript variant 2, mRNA.	chr3	100	100	0		0	NM_001025312	Q8C7W7	NM_001025312	Mm.374850	bladder| bone| bone marrow| brain| embryonic tissue| eye| intestine| kidney| lung| mammary gland| ovary| oviduct| pancreas| skin| spinal cord| spleen| testis| thymus| cleavage| morula| blastocyst| organogenesis| fetus| neonate| juvenile| adult	NM_001025312	GO:0000075	cell cycle checkpoint	not recorded	NM_001025312	GO:0000781	chromosome, telomeric region	inferred from direct assay	NM_001025312	GO:0004518	nuclease activity	inferred from electronic annotation
TC0400000082.mm.1	-7.15	0.002847	-13.27	0.001419	-7.87	0.000962		TC0400000082.mm.1	Mir684-2	microRNA 684-2	+	NR_030455	chr4	11134097 - 11134182	Complex		11134097	11134182	30	4|4	735261	NR_030455	RefSeq	Mus musculus microRNA 684-2 (Mir684-2), microRNA.	chr4	100	100	0		0
TC0400000800.mm.1	-11.33	0.000834	-4.71	0.027137	-3.87	0.021679		TC0400000800.mm.1			+		chr4	78512349 - 78513396	NonCoding		78512349	78513396	30			KnowTID_00005278	Luo lincRNA	Non-coding transcript identified by Luo, et al.	chr4	100	100	0		0
TC0400001552.mm.1	-13.82	1.5e-05	-11.55	0.000747	-4.05	0.002001		TC0400001552.mm.1	Gm24091	predicted gene, 24091	+	ENSMUST00000082550	chr4	130766331 - 130766413	NonCoding		130766331	130766413	30			ENSMUST00000082550	ENSEMBL	ncrna:known chromosome:GRCm38:4:130766331:130766413:1 gene:ENSMUSG00000093793 gene_biotype:snoRNA transcript_biotype:snoRNA	chr4	100	100	0		0
TC0400001553.mm.1	-13.82	1.5e-05	-11.55	0.000747	-4.05	0.002001		TC0400001553.mm.1	Gm23711	predicted gene, 23711	+	ENSMUST00000083856	chr4	130775741 - 130775823	NonCoding		130775741	130775823	30			ENSMUST00000083856	ENSEMBL	ncrna:known chromosome:GRCm38:4:130775741:130775823:1 gene:ENSMUSG00000095119 gene_biotype:snoRNA transcript_biotype:snoRNA	chr4	100	100	0		0
TC0400001678.mm.1	-8.15	0.000954	-2.24	0.008606	-3.03	0.004528		TC0400001678.mm.1	E2f2	E2F transcription factor 2	+	NM_177733	chr4	136172394 - 136196057	Complex		136172394	136196057	100	4 D3|4	242705	NM_177733	RefSeq	Mus musculus E2F transcription factor 2 (E2f2), mRNA.	chr4	100	100	0		0	NM_177733	P56931	NM_177733	Mm.307932	blood| bone| brain| embryonic tissue| epididymis| eye| fertilized ovum| inner ear| intestine| joint| liver| lung| mammary gland| muscle| ovary| pituitary gland| skin| spleen| testis| thymus| vagina|oocyte| zygote| cleavage| morula| organogenesis| fetus| neonate| juvenile| adult	NM_177733	GO:0006351	transcription, DNA-templated	inferred from electronic annotation	NM_177733	GO:0005634	nucleus	inferred from direct assay	NM_177733	GO:0001047	core promoter binding	not recorded	NM_177733	GenMAPP
TC0400002224.mm.1	-10.7	0.000244	-17.87	0.000496	-8.79	0.003169		TC0400002224.mm.1	Gm11826	predicted gene 11826	-	ENSMUST00000118781	chr4	13482755 - 13483192	Complex		13482755	13483192	30			ENSMUST00000118781	ENSEMBL	havana:known chromosome:GRCm38:4:13482755:13483192:-1 gene:ENSMUSG00000083328 gene_biotype:pseudogene transcript_biotype:processed_pseudogene	chr4	100	100	0		0
TC0400002454.mm.1	-4.04	0.002683	-2.56	0.008314	-3.04	0.025605		TC0400002454.mm.1	Bag1	BCL2-associated athanogene 1	-	NM_001171739	chr4	40936398 - 40948294	Coding		40936398	40948294	73	4|4 B1	12017	NM_001171739	RefSeq	Mus musculus BCL2-associated athanogene 1 (Bag1), transcript variant 1, mRNA.	chr4	100	100	0		0	NM_001171739	Q60739	NM_001171739	Mm.688	blood| bone| bone marrow| brain| dorsal root ganglion| embryonic tissue| extraembryonic tissue| eye| fertilized ovum| heart| intestine| kidney| liver| lung| lymph node| mammary gland| molar| muscle| ovary| pancreas| pineal gland| salivary gland| skin| spleen| stomach| sympathetic ganglion| testis| thymus| thyroid| tongue| uterus|oocyte| zygote| cleavage| blastocyst| gastrula| organogenesis| fetus…	NM_001171739	GO:0001933	negative regulation of protein phosphorylation	inferred from mutant phenotype	NM_001171739	GO:0005634	nucleus	inferred from direct assay	NM_001171739	GO:0005515	protein binding	inferred from physical interaction
TC0400002791.mm.1	-20.54	1.8e-05	-16.03	0.003575	-8.8	0.008978		TC0400002791.mm.1	Alad	aminolevulinate, delta-, dehydratase	-	NM_001276446	chr4	62505984 - 62520063	Complex		62505984	62520063	150	4 B3|4 33.17 cM	17025	NM_001276446	RefSeq	Mus musculus aminolevulinate, delta-, dehydratase (Alad), transcript variant 2, mRNA.	chr4	100	100	0		0	NM_001276446	P10518	NM_001276446	Mm.6988	bladder| blood| brain| connective tissue| embryonic tissue| extraembryonic tissue| eye| heart| inner ear| intestine| joint| kidney| liver| lung| lymph node| mammary gland| muscle| pancreas| pituitary gland| skin| spleen| stomach| testis| thymus| thyroid| tongue| cleavage| blastocyst| egg cylinder| organogenesis| fetus| neonate| juvenile| adult	NM_001276446	GO:0006779	porphyrin-containing compound biosynthetic process	inferred from electronic annotation	NM_001276446	GO:0005615	extracellular space	not recorded	NM_001276446	GO:0003824	catalytic activity	inferred from electronic annotation	NM_001276446	GenMAPP
TC0400002845.mm.1	-3.95	0.002931	-2.56	0.002532	-2.19	0.035755		TC0400002845.mm.1	Gm11223	predicted gene 11223	-	ENSMUST00000056452	chr4	69925201 - 69926171	Pseudogene		69925201	69926171	30			ENSMUST00000056452	ENSEMBL	[retired] cdna:pseudogene chromosome:GRCm38:4:69925201:69926171:-1 gene:ENSMUSG00000046341 gene_biotype:pseudogene transcript_biotype:processed_pseudogene	chr4	100	100	0		0			ENSMUST00000120560	Mm.410712
TC0400003266.mm.1	-2.03	0.015886	-2.25	0.0017	-2.1	0.00648		TC0400003266.mm.1	Gm12750	predicted gene 12750	-	ENSMUST00000150239	chr4	109402280 - 109406316	NonCoding		109402280	109406316	261			ENSMUST00000150239	ENSEMBL	havana:known chromosome:GRCm38:4:109403809:109406155:-1 gene:ENSMUSG00000085873 gene_biotype:antisense transcript_biotype:antisense	chr4	100	100	0		0
TC0400003267.mm.1	-4.24	2.84e-07	-2.82	0.000196	-2.68	0.002171		TC0400003267.mm.1	Rnf11	ring finger protein 11	-	NM_013876	chr4	109451098 - 109484728	Complex		109451098	109484728	160	4 C7|4	29864	NM_013876	RefSeq	Mus musculus ring finger protein 11 (Rnf11), mRNA.	chr4	100	100	0		0	NM_013876	Q9QYK7	NM_013876	Mm.456388	adipose tissue| adrenal gland| bladder| blood| bone marrow| brain| connective tissue| dorsal root ganglion| embryonic tissue| epididymis| extraembryonic tissue| eye| fertilized ovum| heart| inner ear| intestine| joint| kidney| liver| lung| lymph node| mammary gland| muscle| pancreas| prostate| skin| spinal cord| spleen| sympathetic ganglion| testis| thymus| tongue| vagina| zygote| cleavage| morul…	NM_013876	GO:0006511	ubiquitin-dependent protein catabolic process	inferred from physical interaction	NM_013876	GO:0000151	ubiquitin ligase complex	inferred from physical interaction	NM_013876	GO:0004842	ubiquitin-protein transferase activity	not recorded
TC0500000005.mm.1	-5.32	0.000582	-10.59	6.2e-05	-5.84	0.00431		TC0500000005.mm.1	Gm15772	predicted gene 15772	+	ENSMUST00000078810	chr5	3236389 - 3236907	Pseudogene		3236389	3236907	30			ENSMUST00000078810	ENSEMBL	[retired] cdna:pseudogene chromosome:GRCm38:5:3236389:3236907:1 gene:ENSMUSG00000062353 gene_biotype:pseudogene transcript_biotype:processed_pseudogene	chr5	100	100	0		0
TC0500000055.mm.1	-7.54	5.1e-05	-11.06	0.000515	-8.1	0.000234		TC0500000055.mm.1	Gm15610	predicted gene 15610	+	ENSMUST00000120584	chr5	8971948 - 8972142	Pseudogene		8971948	8972142	30			ENSMUST00000120584	ENSEMBL	ensembl_havana_transcript:known chromosome:GRCm38:5:8971948:8972142:1 gene:ENSMUSG00000078183 gene_biotype:pseudogene transcript_biotype:processed_pseudogene	chr5	100	100	0		0
TC0500000106.mm.1	-6.74	0.003024	-4.56	0.001045	-8.58	0.001545		TC0500000106.mm.1	Speer8-ps1	spermatogenesis associated glutamate (E)-rich protein 8, pseudogene 1	+	NR_001584	chr5	14945294 - 15035445	Complex		14945294	15035445	80	5 A1-A2|5	74062	NR_001584	RefSeq	Mus musculus spermatogenesis associated glutamate (E)-rich protein 8, pseudogene 1 (Speer8-ps1), non-coding RNA.	chr5	100	100	0		0			NR_001584	Mm.394766	embryonic tissue| eye| stomach| testis| cleavage| adult
TC0500000107.mm.1	-5.9	0.003174	-5.47	0.002015	-8.98	0.001645		TC0500000107.mm.1	Gm21847	predicted gene, 21847	+	ENSMUST00000178227	chr5	15483291 - 15656679	Complex		15483291	15656679	70			ENSMUST00000178227	ENSEMBL	ensembl:known chromosome:GRCm38:5:15516489:15656679:1 gene:ENSMUSG00000094230 gene_biotype:protein_coding transcript_biotype:protein_coding	chr5	100	100	0		0	ENSMUST00000178227	J3QJW6	uc029vfx.1	Mm.394766	embryonic tissue| eye| stomach| testis| cleavage| adult
TC0500000108.mm.1	-5.58	0.002031	-5.82	0.001437	-9.23	0.00179		TC0500000108.mm.1	Speer7-ps1	spermatogenesis associated glutamate (E)-rich protein 7, pseudogene 1	+	NR_001585	chr5	15536013 - 15714596	Complex		15536013	15714596	70	5 A2|5	75858	NR_001585	RefSeq	Mus musculus spermatogenesis associated glutamate (E)-rich protein 7, pseudogene 1 (Speer7-ps1), non-coding RNA.	chr5	100	100	0		0			NR_001585	Mm.359463	eye| testis| fetus| adult
TC0500000109.mm.1	-5.08	0.01167	-4.6	0.000961	-7.71	0.003883		TC0500000109.mm.1	Gm21083	predicted gene, 21083	+	XM_003688810	chr5	15577337 - 15582097	Coding		15577337	15582097	50	5|5	100861621	XM_003688810	RefSeq	[retired] PREDICTED: Mus musculus disks large homolog 5-like, transcript variant 1 (LOC100861621), mRNA.	chr5	100	100	0		0
TC0500000110.mm.1	-3.83	0.018332	-3.14	0.00185	-4.66	0.008928		TC0500000110.mm.1	Speer4d	spermatogenesis associated glutamate (E)-rich protein 4d	+	NM_025759	chr5	15619064 - 15623864	Coding		15619064	15623864	90	5 A2|5	360220	NM_025759	RefSeq	Mus musculus spermatogenesis associated glutamate (E)-rich protein 4d (Speer4d), mRNA.	chr5	100	100	0		0	NM_025759	L7N216	NM_025759	Mm.425235	heart| testis| juvenile| adult	NM_025759	GO:0008150	biological_process	no biological data available	NM_025759	GO:0005634	nucleus	inferred from direct assay	NM_025759	GO:0003674	molecular_function	no biological data available
TC0500000210.mm.1	-8.22	0.002599	-12.89	0.002579	-5.96	0.002338		TC0500000210.mm.1	Mir684-1	microRNA 684-1	+	uc012dtb.1	chr5	24257528 - 24257612	Complex		24257528	24257612	30	2|2	735274	uc012dtb.1	UCSC Genes	Mus musculus microRNA 684-1 (Mir684-1), microRNA.	chr5	100	100	0		0
TC0500000352.mm.1	-3.75	0.031066	-4.09	0.010274	-2.09	0.017047		TC0500000352.mm.1	Rpl35a-ps5	ribosomal protein L35A, pseudogene 5	+	ENSMUST00000137013	chr5	33075995 - 33076411	Pseudogene		33075995	33076411	30			ENSMUST00000137013	ENSEMBL	havana:known chromosome:GRCm38:5:33076038:33076370:1 gene:ENSMUSG00000093885 gene_biotype:pseudogene transcript_biotype:processed_pseudogene	chr5	100	100	0		0
TC0500000974.mm.1	-2.75	0.002099	-2.79	0.001525	-2.33	0.034116		TC0500000974.mm.1	2310034O05Rik	RIKEN cDNA 2310034O05 gene	+	NR_040679	chr5	100210692 - 100218049	NonCoding		100210692	100218049	40	5|5	69571	NR_040679	RefSeq	Mus musculus RIKEN cDNA 2310034O05 gene (2310034O05Rik), long non-coding RNA.	chr5	100	100	0		0			NR_040679	Mm.396412	tongue| adult
TC0500001223.mm.1	-3.84	0.000821	-3.88	0.00059	-2.84	0.010644		TC0500001223.mm.1	Ube3b	ubiquitin protein ligase E3B	+	NM_054093	chr5	114380607 - 114421168	Complex		114380607	114421168	315	5 F|5	117146	NM_054093	RefSeq	Mus musculus ubiquitin protein ligase E3B (Ube3b), mRNA.	chr5	100	100	0		0	NM_054093	Q9ES34	NM_054093	Mm.28792	bladder| blood| bone| bone marrow| brain| dorsal root ganglion| embryonic tissue| extraembryonic tissue| eye| heart| inner ear| intestine| joint| kidney| liver| lung| mammary gland| muscle| nasopharynx| olfactory mucosa| ovary| oviduct| pancreas| salivary gland| skin| spinal cord| spleen| stomach| testis| thymus| thyroid| vagina| morula| blastocyst| gastrula| organogenesis| fetus| neonate| juveni…	NM_054093	GO:0042787	protein ubiquitination involved in ubiquitin-dependent protein catabolic process	not recorded	NM_054093	GO:0005634	nucleus	not recorded	NM_054093	GO:0004842	ubiquitin-protein transferase activity	not recorded
TC0500001972.mm.1	-5.87	0.008819	-4.14	0.002409	-6.42	0.001295		TC0500001972.mm.1	Gm9758	predicted gene 9758	-	NM_198666	chr5	14910122 - 14914899	Complex		14910122	14914899	70	5 A1|5	381714	NM_198666	RefSeq	Mus musculus predicted gene 9758 (Gm9758), mRNA.	chr5	100	100	0		0	NM_198666	Q80ZT2	NM_198666	Mm.368256	embryonic tissue| eye| heart| mammary gland| testis| fetus| juvenile| adult	NM_198666	GO:0008150	biological_process	no biological data available	NM_198666	GO:0005575	cellular_component	no biological data available	NM_198666	GO:0003674	molecular_function	no biological data available
TC0500001973.mm.1	-5.33	0.011655	-4.55	0.002426	-6.32	0.002732		TC0500001973.mm.1	Speer4e	spermatogenesis associated glutamate (E)-rich protein 4e	-	NM_001122661	chr5	14933221 - 14938475	Coding		14933221	14938475	70	5 A1|5	624245	NM_001122661	RefSeq	Mus musculus spermatogenesis associated glutamate (E)-rich protein 4e (Speer4e), mRNA.	chr5	100	100	0		0	NM_001122661	Q80ZT2	NM_001122661	Mm.368256	embryonic tissue| eye| heart| mammary gland| testis| fetus| juvenile| adult	NM_001122661	GO:0008150	biological_process	no biological data available	NM_001122661	GO:0005575	cellular_component	no biological data available	NM_001122661	GO:0003674	molecular_function	no biological data available
TC0500001974.mm.1	-4.95	0.010042	-3.85	0.003322	-7.25	0.001425		TC0500001974.mm.1	Gm10354	predicted gene 10354	-	NM_001281514	chr5	14974113 - 14978935	Coding		14974113	14978935	70	5|5 6.48 cM	100503549	NM_001281514	RefSeq	Mus musculus predicted gene 10354 (Gm10354), mRNA.	chr5	100	100	0		0	NM_001281514	K7N6A0	NM_001281514	Mm.491086	testis| adult	NM_001281514	GO:0008150	biological_process	no biological data available	NM_001281514	GO:0005575	cellular_component	no biological data available	NM_001281514	GO:0003674	molecular_function	no biological data available
TC0500001975.mm.1	-4.93	0.011249	-3.97	0.009255	-5.81	0.002254		TC0500001975.mm.1	Gm17019	predicted gene 17019	-	NM_182957	chr5	15028950 - 15033007	Coding		15028950	15033007	50	5 A2|5	66773	NM_182957	RefSeq	Mus musculus predicted gene 17019 (Gm17019), mRNA.	chr5	100	100	0		0	NM_182957	Q80ZT2	NM_182957	Mm.368256	embryonic tissue| eye| heart| mammary gland| testis| fetus| juvenile| adult	NM_182957	GO:0008150	biological_process	no biological data available	NM_182957	GO:0005575	cellular_component	no biological data available	NM_182957	GO:0003674	molecular_function	no biological data available
TC0500001976.mm.1	-5.17	0.008091	-4.84	0.002654	-7.63	0.00306		TC0500001976.mm.1	Gm21149	predicted gene, 21149	-	XM_003688812	chr5	15471698 - 15605059	Coding		15471698	15605059	167	5|5	100861702	XM_003688812	RefSeq	PREDICTED: Mus musculus predicted gene, 21149 (Gm21149), mRNA.	chr5	100	100	0		0
TC0500001978.mm.1	-6.45	0.001702	-3.69	0.004387	-5.98	0.011691		TC0500001978.mm.1			-		chr5	15616247 - 15618061	NonCoding		15616247	15618061	30			NONMMUT051289	NONCODE	Non-coding transcript identified by NONCODE: Linc	chr5	100	100	0		0
TC0500001979.mm.1	-4.73	0.013052	-3.11	0.005056	-6.6	0.010429		TC0500001979.mm.1	4930572O03Rik	spermatogenesis associated glutamate (E)-rich protein pseudogene	-	NR_073011	chr5	15652286 - 15657059	Complex		15652286	15657059	60	5 A2|5	381715	NR_073011	RefSeq	Mus musculus RIKEN cDNA 4930572O03 gene (4930572O03Rik), non-coding RNA.	chr5	100	100	0		0	NR_073011	Q8C5Y0	NR_073011	Mm.382859	testis| adult	NR_073011	GO:0008150	biological_process	no biological data available	NR_073011	GO:0005575	cellular_component	no biological data available	NR_073011	GO:0003674	molecular_function	no biological data available
TC0500001980.mm.1	-4.76	0.016284	-3.39	0.005519	-6.73	0.003812		TC0500001980.mm.1	Speer4c	spermatogenesis associated glutamate (E)-rich protein 4c	-	NM_001281511	chr5	15709501 - 15714271	Coding		15709501	15714271	72	5 A2|5 6.52 cM	100502967	NM_001281511	RefSeq	Mus musculus spermatogenesis associated glutamate (E)-rich protein 4c (Speer4c), mRNA.	chr5	100	100	0		0	NM_001281511	L7N216	NM_001281511	Mm.484583	testis| adult	NM_001281511	GO:0008150	biological_process	no biological data available	NM_001281511	GO:0005634	nucleus	inferred from direct assay	NM_001281511	GO:0003674	molecular_function	no biological data available
TC0500003001.mm.1	-5.33	0.001454	-2.67	0.003352	-2.5	0.008751		TC0500003001.mm.1	Hscb	HscB iron-sulfur cluster co-chaperone homolog (E. coli)	-	NM_153571	chr5	110829070 - 110839777	Complex		110829070	110839777	90	5 F|5	100900	NM_153571	RefSeq	Mus musculus HscB iron-sulfur cluster co-chaperone homolog (E. coli) (Hscb), mRNA.	chr5	100	100	0		0	NM_153571	Q8K3A0	NM_153571	Mm.200231	brain| embryonic tissue| epididymis| fertilized ovum| heart| intestine| kidney| lung| mammary gland| skin| spinal cord| testis| thymus| zygote| fetus| neonate| juvenile| adult	NM_153571	GO:0006457	protein folding	inferred from electronic annotation	NM_153571	GO:0005737	cytoplasm	not recorded	NM_153571	GO:0046872	metal ion binding	inferred from electronic annotation
TC0500003064.mm.1	-3.72	0.002276	-2.59	0.00087	-2.38	0.017936		TC0500003064.mm.1	Gltp	glycolipid transfer protein	-	NM_019821	chr5	114669403 - 114690984	Coding		114669403	114690984	113	5 F|5	56356	NM_019821	RefSeq	Mus musculus glycolipid transfer protein (Gltp), mRNA.	chr5	100	100	0		0	NM_019821	Q9JL62	NM_019821	Mm.275766	bladder| bone| bone marrow| brain| embryonic tissue| extraembryonic tissue| eye| fertilized ovum| heart| inner ear| intestine| joint| kidney| lung| mammary gland| nasopharynx| ovary| prostate| salivary gland| skin| spleen| stomach| testis| thymus| thyroid| tongue|oocyte| zygote| cleavage| blastocyst| gastrula| organogenesis| fetus| neonate| juvenile| adult	NM_019821	GO:0006810	transport	inferred from electronic annotation	NM_019821	GO:0005737	cytoplasm	inferred from electronic annotation	NM_019821	GO:0008289	lipid binding	not recorded
TC0500003229.mm.1	-4.97	0.018301	-3.8	0.021618	-2.53	0.0172		TC0500003229.mm.1	Rpl35a-ps6	ribosomal protein L35A, pseudogene 6	-	ENSMUST00000148282	chr5	123255481 - 123255813	Pseudogene		123255481	123255813	30			ENSMUST00000148282	ENSEMBL	ensembl_havana_transcript:known chromosome:GRCm38:5:123255481:123255813:-1 gene:ENSMUSG00000094664 gene_biotype:pseudogene transcript_biotype:processed_pseudogene	chr5	100	100	0		0
TC0600003489.mm.1	-2.87	0.000482	-2.26	0.001041	-2.64	0.001328		TC0600003489.mm.1	Glcci1	glucocorticoid induced transcript 1	+	NM_001286728	chr6	8509596 - 8597549	Complex		8509596	8597549	279	6 A1|6	170772	NM_001286728	RefSeq	Mus musculus glucocorticoid induced transcript 1 (Glcci1), transcript variant 2, mRNA.	chr6	100	100	0		0	NM_001286728	Q8K3I9	NM_001286728	Mm.210787	adrenal gland| bone| bone marrow| brain| dorsal root ganglion| embryonic tissue| eye| fertilized ovum| heart| inner ear| intestine| kidney| lung| mammary gland| nasopharynx| ovary| pancreas| pituitary gland| prostate| skin| spleen| stomach| testis| thymus| uterus|oocyte| unfertilized ovum| zygote| cleavage| morula| organogenesis| fetus| neonate| juvenile| adult	ENSMUST00000064285	GO:0008150	biological_process	no biological data available	NM_001286728	GO:0005737	cytoplasm	inferred from direct assay	NM_001286728	GO:0005515	protein binding	inferred from physical interaction
TC0600000277.mm.1	-5.37	0.003073	-5.06	0.041022	-3.22	0.001756		TC0600000277.mm.1	Mest	mesoderm specific transcript	+	NM_001252292	chr6	30723547 - 30748466	Complex		30723547	30748466	263	6 B1|6 12.53 cM	17294	NM_001252292	RefSeq	Mus musculus mesoderm specific transcript (Mest), transcript variant 1, mRNA.	chr6	100	100	0		0	NM_001252292	Q07646	NM_001252292	Mm.335639	bone| brain| connective tissue| dorsal root ganglion| embryonic tissue| epididymis| extraembryonic tissue| eye| fertilized ovum| heart| inner ear| joint| kidney| liver| lung| mammary gland| molar| muscle| nasopharynx| ovary| pancreas| pineal gland| pituitary gland| skin| spinal cord| spleen| stomach| testis| thymus| uterus|oocyte| unfertilized ovum| zygote| cleavage| blastocyst| gastrula| organog…	NM_001252292	GO:0010883	regulation of lipid storage	inferred from mutant phenotype	NM_001252292	GO:0005783	endoplasmic reticulum	inferred from direct assay	NM_001252292	GO:0003824	catalytic activity	inferred from electronic annotation
TC0600000664.mm.1	-34.85	0.000154	-19.32	0.009354	-16.25	0.042457		TC0600000664.mm.1	Aqp1	aquaporin 1	+	NM_007472	chr6	55336299 - 55348555	Coding		55336299	55348555	70	6 B3|6 27.38 cM	11826	NM_007472	RefSeq	Mus musculus aquaporin 1 (Aqp1), mRNA.	chr6	100	100	0		0	NM_007472	Q02013	NM_007472	Mm.18625	bladder| bone| bone marrow| brain| connective tissue| embryonic tissue| eye| heart| inner ear| intestine| joint| kidney| liver| lung| lymph node| mammary gland| muscle| nasopharynx| ovary| pancreas| pineal gland| salivary gland| skin| spinal cord| spleen| stomach| thymus| thyroid| uterus| vagina| organogenesis| fetus| neonate| juvenile| adult					NM_007472	GO:0005623	cell	inferred from mutant phenotype	NM_007472	GO:0005215	transporter activity	inferred from electronic annotation
TC0600001296.mm.1	-5.78	0.000181	-2.9	0.001456	-2.4	0.010146		TC0600001296.mm.1	2015-03-08	membrane-associated ring finger (C3HC4) 8	+	NM_027920	chr6	116338022 - 116409542	Complex		116338022	116409542	274	6|6	71779	NM_027920	RefSeq	Mus musculus membrane-associated ring finger (C3HC4) 8 (March8), mRNA.	chr6	100	100	0		0	NM_027920	Q9DBD2	NM_027920	Mm.27064	bladder| blood| bone marrow| brain| embryonic tissue| extraembryonic tissue| eye| heart| inner ear| intestine| kidney| liver| lung| lymph node| mammary gland| muscle| nasopharynx| ovary| pancreas| pituitary gland| prostate| salivary gland| skin| spleen| stomach| testis| thymus| thyroid| unfertilized ovum| morula| gastrula| organogenesis| fetus| neonate| juvenile| adult	NM_027920	GO:0000209	protein polyubiquitination	not recorded	NM_027920	GO:0005764	lysosome	not recorded
TC0600002053.mm.1	-4.26	0.004101	-4.82	0.002618	-2.65	0.016837		TC0600002053.mm.1	Gm13862	predicted gene 13862	-	ENSMUST00000121220	chr6	34810631 - 34810827	Pseudogene		34810631	34810827	30			ENSMUST00000121220	ENSEMBL	havana:known chromosome:GRCm38:6:34810631:34810827:-1 gene:ENSMUSG00000082118 gene_biotype:pseudogene transcript_biotype:processed_pseudogene	chr6	100	100	0		0
TC0600002213.mm.1	-3.72	0.01059	-3.55	0.006508	-2.84	0.022761		TC0600002213.mm.1	Rpl35a-ps7	ribosomal protein L35A, pseudogene 7	-	ENSMUST00000080603	chr6	47815300 - 47815632	Pseudogene		47815300	47815632	30			ENSMUST00000080603	ENSEMBL	ensembl_havana_transcript:known chromosome:GRCm38:6:47815300:47815632:-1 gene:ENSMUSG00000094557 gene_biotype:pseudogene transcript_biotype:processed_pseudogene	chr6	100	100	0		0
TC0700000058.mm.1	-3.97	0.000415	-3.1	0.005057	-2.71	0.008935		TC0700000058.mm.1	Epn1	epsin 1	+	NM_001252454	chr7	5080217 - 5098178	Complex		5080217	5098178	215	7 A1|7	13854	NM_001252454	RefSeq	Mus musculus epsin 1 (Epn1), transcript variant 2, mRNA.	chr7	100	100	0		0	NM_001252454	Q80VP1	NM_001252454	Mm.3091	blood| brain| embryonic tissue| eye| inner ear| intestine| kidney| liver| lung| mammary gland| muscle| nasopharynx| ovary| pancreas| salivary gland| skin| spleen| testis| cleavage| organogenesis| fetus| neonate| juvenile| adult	NM_001252454	GO:0001701	in utero embryonic development	inferred from genetic interaction	NM_001252454	GO:0005634	nucleus	not recorded	NM_001252454	GO:0008134	transcription factor binding	not recorded
TC0700000630.mm.1	-3.82	0.002617	-3.95	0.005256	-2.17	0.0316		TC0700000630.mm.1	Gm12778	predicted gene 12778	+	ENSMUST00000122341	chr7	34175712 - 34176044	Pseudogene		34175712	34176044	30			ENSMUST00000122341	ENSEMBL	havana:known chromosome:GRCm38:7:34175712:34176044:1 gene:ENSMUSG00000081491 gene_biotype:pseudogene transcript_biotype:processed_pseudogene	chr7	100	100	0		0
TC0700001416.mm.1	-5.46	0.034434	-9.46	0.001622	-3.62	0.041066		TC0700001416.mm.1			+		chr7	100675088 - 100679995	NonCoding		100675088	100679995	50			KnowTID_00006616	Luo lincRNA	Non-coding transcript identified by Luo, et al.	chr7	100	100	0		0
TC0700001845.mm.1	-8.22	0.002599	-12.89	0.002579	-5.96	0.002338		TC0700001845.mm.1	Mir684-1	microRNA 684-1	+	uc012fue.1	chr7	127398916 - 127399000	Complex		127398916	127399000	30	2|2	735274	uc012fue.1	UCSC Genes	Mus musculus microRNA 684-1 (Mir684-1), microRNA.	chr7	100	100	0		0
TC0700002368.mm.1	-5.36	0.0005	-9.44	0.000527	-2.54	0.022359		TC0700002368.mm.1	Gm10712	predicted gene 10712	-	ENSMUST00000092523	chr7	13332646 - 13333257	Pseudogene		13332646	13333257	30			ENSMUST00000092523	ENSEMBL	havana:known chromosome:GRCm38:7:13332646:13333257:-1 gene:ENSMUSG00000074547 gene_biotype:pseudogene transcript_biotype:processed_pseudogene	chr7	100	100	0		0
TC0700002643.mm.1	-11.07	0.000697	-7.01	0.000102	-5.68	0.004019		TC0700002643.mm.1	Hnrnpul1	heterogeneous nuclear ribonucleoprotein U-like 1	-	NM_144922	chr7	25721482 - 25754750	Complex		25721482	25754750	200	7 A3|7	232989	NM_144922	RefSeq	Mus musculus heterogeneous nuclear ribonucleoprotein U-like 1 (Hnrnpul1), transcript variant 1, mRNA.	chr7	100	100	0		0	NM_144922	Q8VDM6	NM_144922	Mm.254223	blood| bone marrow| brain| embryonic tissue| extraembryonic tissue| eye| heart| inner ear| intestine| kidney| liver| lung| lymph node| mammary gland| nasopharynx| ovary| pituitary gland| salivary gland| skin| spinal cord| spleen| testis| thymus| blastocyst| organogenesis| fetus| neonate| juvenile| adult	NM_144922	GO:0006351	transcription, DNA-templated	inferred from electronic annotation	NM_144922	GO:0005634	nucleus	not recorded	NM_144922	GO:0003676	nucleic acid binding	inferred from electronic annotation
TC0700004309.mm.1	-2.35	0.00101	-2.29	0.003951	-2.07	0.005017		TC0700004309.mm.1	Maz	MYC-associated zinc finger protein (purine-binding transcription factor)	-	NM_010772	chr7	127022134 - 127027019	Coding		127022134	127027019	100	7|7 F4	17188	NM_010772	RefSeq	Mus musculus MYC-associated zinc finger protein (purine-binding transcription factor) (Maz), mRNA.	chr7	100	100	0		0	NM_010772	P56671	NM_010772	Mm.378964	bladder| bone marrow| brain| embryonic tissue| extraembryonic tissue| eye| heart| inner ear| kidney| liver| lung| lymph node| mammary gland| muscle| ovary| skin| testis| thymus|oocyte| blastocyst| organogenesis| fetus| neonate| juvenile| adult	NM_010772	GO:0006351	transcription, DNA-templated	inferred from electronic annotation	NM_010772	GO:0005634	nucleus	inferred from direct assay	NM_010772	GO:0000979	RNA polymerase II core promoter sequence-specific DNA binding	not recorded
TC0700004332.mm.1	-4.6	0.000545	-3.55	0.001017	-3.67	0.01508		TC0700004332.mm.1	Gm166	predicted gene 166	-	NM_001033040	chr7	127582383 - 127588595	Coding		127582383	127588595	98	7 F3|7	233899	NM_001033040	RefSeq	Mus musculus predicted gene 166 (Gm166), mRNA.	chr7	100	100	0		0	NM_001033040	Q6NZQ0	NM_001033040	Mm.25220	brain| embryonic tissue| eye| fertilized ovum| heart| kidney| muscle| nasopharynx| salivary gland| spinal cord| testis| thymus| zygote| cleavage| organogenesis| fetus| neonate| juvenile| adult	NM_001033040	GO:0008150	biological_process	no biological data available	NM_001033040	GO:0005575	cellular_component	no biological data available	NM_001033040	GO:0003674	molecular_function	no biological data available
TC0700004451.mm.1	-4.24	0.001023	-2.83	0.003294	-3.18	0.019675		TC0700004451.mm.1	Mki67	antigen identified by monoclonal antibody Ki 67	-	NM_001081117	chr7	135689788 - 135716379	Complex		135689788	135716379	160	7|7 F3-F5	17345	NM_001081117	RefSeq	Mus musculus antigen identified by monoclonal antibody Ki 67 (Mki67), mRNA.	chr7	100	100	0		0	NM_001081117	E9PVX6	NM_001081117	Mm.4078	bone marrow| brain| embryonic tissue| extraembryonic tissue| eye| heart| intestine| kidney| lung| mammary gland| molar| ovary| pancreas| prostate| skin| spleen| sympathetic ganglion| thymus| thyroid|oocyte| unfertilized ovum| cleavage| morula| blastocyst| gastrula| organogenesis| fetus| neonate| juvenile| adult	NM_001081117	GO:0007126	meiotic nuclear division	inferred from direct assay	NM_001081117	GO:0000775	chromosome, centromeric region	inferred from direct assay	NM_001081117	GO:0008022	protein C-terminus binding	not recorded
TC0800000042.mm.1	-5.41	0.00024	-5.57	0.010714	-2.61	0.017114		TC0800000042.mm.1			+		chr8	4778042 - 4778269	Coding		4778042	4778269	30			XM_889268	MGI/Jackson Lab	[retired] PREDICTED: predicted gene 6334 (Gm6334), mRNA.	chr8	100	100	0		0
TC0800003223.mm.1	-2.52	0.015728	-2.3	0.001124	-3.01	0.009496		TC0800003223.mm.1			+		chr8	20589327 - 20595540	NonCoding		20589327	20595540	30			uc029wrl.1	UCSC Genes	Mus musculus 16 days embryo head cDNA, RIKEN full-length enriched library, clone:C130084F15 product:unclassifiable, full insert sequence.	chr8	100	100	0		0
TC0800000937.mm.1	-6.39	0.00102	-4.35	0.001641	-3.3	0.003112		TC0800000937.mm.1	Asf1b	anti-silencing function 1B histone chaperone	+	NM_024184	chr8	83955507 - 83970197	Complex		83955507	83970197	60	8 C3|8	66929	NM_024184	RefSeq	Mus musculus anti-silencing function 1B histone chaperone (Asf1b), mRNA.	chr8	100	100	0		0	NM_024184	Q9DAP7	NM_024184	Mm.29680	bone| bone marrow| brain| connective tissue| embryonic tissue| extraembryonic tissue| eye| fertilized ovum| inner ear| intestine| joint| kidney| liver| lung| lymph node| mammary gland| ovary| pancreas| prostate| salivary gland| skin| spinal cord| spleen| testis| thymus|oocyte| unfertilized ovum| zygote| cleavage| morula| blastocyst| gastrula| organogenesis| fetus| neonate| juvenile| adult	NM_024184	GO:0006333	chromatin assembly or disassembly	inferred from electronic annotation	NM_024184	GO:0000785	chromatin	inferred from direct assay	NM_024184	GO:0042393	histone binding	inferred from direct assay
TC0800001494.mm.1	-3.15	0.000373	-3.43	0.001242	-2.59	0.0004		TC0800001494.mm.1	Trappc2l	trafficking protein particle complex 2-like	+	NM_021502	chr8	122611626 - 122615591	Coding		122611626	122615591	50	8 E1|8	59005	NM_021502	RefSeq	Mus musculus trafficking protein particle complex 2-like (Trappc2l), mRNA.	chr8	100	100	0		0	NM_021502	Q9JME7	NM_021502	Mm.38746	bladder| blood| brain| connective tissue| embryonic tissue| eye| heart| inner ear| intestine| kidney| liver| mammary gland| muscle| pancreas| pituitary gland| prostate| stomach| testis| thymus| thyroid| tongue| uterus| blastocyst| organogenesis| fetus| neonate| juvenile| adult	NM_021502	GO:0006810	transport	inferred from electronic annotation	NM_021502	GO:0005622	intracellular	inferred from electronic annotation
TC0800002835.mm.1	-29.75	1.2e-05	-8.05	0.000873	-7.25	0.003514		TC0800002835.mm.1	Ranbp10	RAN binding protein 10	-	NM_145824	chr8	105768308 - 105827350	Complex		105768308	105827350	160	8 D3|8	74334	NM_145824	RefSeq	Mus musculus RAN binding protein 10 (Ranbp10), mRNA.	chr8	100	100	0		0	NM_145824	Q6VN19	NM_145824	Mm.4206	bladder| bone| bone marrow| brain| dorsal root ganglion| embryonic tissue| extraembryonic tissue| eye| heart| inner ear| kidney| liver| lung| lymph node| mammary gland| muscle| nasopharynx| olfactory mucosa| pancreas| salivary gland| skin| spleen| testis| thymus| cleavage| morula| blastocyst| gastrula| organogenesis| fetus| neonate| juvenile| adult	NM_145824	GO:0000226	microtubule cytoskeleton organization	inferred from mutant phenotype	NM_145824	GO:0005634	nucleus	inferred from electronic annotation	NM_145824	GO:0005087	Ran guanyl-nucleotide exchange factor activity	inferred from direct assay
TC0800003064.mm.1	-4.03	0.000502	-3.58	0.005792	-4.01	0.0231		TC0800003064.mm.1	Gm17709	predicted gene, 17709	-	ENSMUST00000168516	chr8	121972727 - 121973822	Pseudogene		121972727	121973822	30			ENSMUST00000168516	ENSEMBL	[retired] cdna:pseudogene chromosome:GRCm38:8:121972727:121973822:-1 gene:ENSMUSG00000091952 gene_biotype:pseudogene transcript_biotype:pseudogene	chr8	100	100	0		0
TC0900000819.mm.1	-4.23	0.00966	-3.73	0.001994	-3.66	0.008943		TC0900000819.mm.1	Tipin	timeless interacting protein	+	NM_025372	chr9	64281607 - 64304794	Coding		64281607	64304794	74	9 D|9 34.6 cM	66131	NM_025372	RefSeq	Mus musculus timeless interacting protein (Tipin), mRNA.	chr9	100	100	0		0	NM_025372	Q91WA1	NM_025372	Mm.196219	bladder| blood| bone marrow| brain| embryonic tissue| extraembryonic tissue| eye| fertilized ovum| heart| intestine| kidney| liver| lung| lymph node| mammary gland| molar| muscle| ovary| pancreas| prostate| salivary gland| skin| spinal cord| spleen| stomach| testis| thymus| thyroid| tongue| unfertilized ovum| zygote| cleavage| morula| blastocyst| egg cylinder| gastrula| organogenesis| fetus| neon…	NM_025372	GO:0000076	DNA replication checkpoint	not recorded	NM_025372	GO:0000790	nuclear chromatin	not recorded	NM_025372	GO:0005515	protein binding	inferred from physical interaction
TC0900000857.mm.1	-5.33	0.003374	-4.32	0.000744	-3.5	0.005436		TC0900000857.mm.1			+		chr9	65904679 - 65908381	NonCoding		65904679	65908381	49			NONMMUT069643	NONCODE	Non-coding transcript identified by NONCODE: Antisense	chr9	100	100	0		0
TC0900001160.mm.1	-4.73	0.044156	-2.57	0.016007	-2.05	0.004774		TC0900001160.mm.1	Gm22866	predicted gene, 22866	+	ENSMUST00000083947	chr9	90351995 - 90352171	NonCoding		90351995	90352171	30			ENSMUST00000083947	ENSEMBL	ncrna:known chromosome:GRCm38:9:90351995:90352171:1 gene:ENSMUSG00000065881 gene_biotype:snRNA transcript_biotype:snRNA	chr9	100	100	0		0
TC0900001195.mm.1	-7.39	0.000117	-2.54	0.007333	-2.13	0.037673		TC0900001195.mm.1	Paqr9	progestin and adipoQ receptor family member IX	+	NM_198414	chr9	95559817 - 95562121	Complex		95559817	95562121	30	9 E3.3|9	75552	NM_198414	RefSeq	Mus musculus progestin and adipoQ receptor family member IX (Paqr9), mRNA.	chr9	100	100	0		0	NM_198414	Q6TCG2	NM_198414	Mm.151485	adrenal gland| brain| dorsal root ganglion| eye| intestine| kidney| liver| lymph node| mammary gland| pancreas| skin| spinal cord| spleen| testis| fetus| neonate| juvenile| adult	NM_198414	GO:0008150	biological_process	no biological data available	NM_198414	GO:0016020	membrane	inferred from electronic annotation	NM_198414	GO:0004872	receptor activity	not recorded
TC0900001295.mm.1	-5.38	0.000118	-9.75	0.000154	-6.1	0.002622		TC0900001295.mm.1	Ryk	receptor-like tyrosine kinase	+	NM_001042607	chr9	102834917 - 102908307	Complex		102834917	102908307	220	9 F1|9 54.72 cM	20187	NM_001042607	RefSeq	Mus musculus receptor-like tyrosine kinase (Ryk), transcript variant 2, mRNA.	chr9	100	100	0		0	NM_001042607	Q01887	NM_001042607	Mm.335391	bladder| bone| bone marrow| brain| connective tissue| embryonic tissue| extraembryonic tissue| eye| fertilized ovum| inner ear| kidney| liver| lung| mammary gland| muscle| ovary| pancreas| pituitary gland| prostate| salivary gland| skin| spleen| sympathetic ganglion| testis| thymus|oocyte| unfertilized ovum| zygote| cleavage| morula| blastocyst| gastrula| organogenesis| fetus| neonate| juvenile| …	NM_001042607	GO:0006468	protein phosphorylation	inferred from electronic annotation	NM_001042607	GO:0005634	nucleus	inferred from direct assay	NM_001042607	GO:0000166	nucleotide binding	inferred from electronic annotation
TC0900001403.mm.1	-5.09	0.000785	-3.72	0.006602	-2.83	0.010928		TC0900001403.mm.1	Usp4	ubiquitin specific peptidase 4 (proto-oncogene)	+	NM_011678	chr9	108347831 - 108392529	Complex		108347831	108392529	260	9 F2|9 59.25 cM	22258	NM_011678	RefSeq	Mus musculus ubiquitin specific peptidase 4 (proto-oncogene) (Usp4), mRNA.	chr9	100	100	0		0	NM_011678	P35123	NM_011678	Mm.3974	bladder| blood| bone| bone marrow| brain| connective tissue| dorsal root ganglion| embryonic tissue| extraembryonic tissue| eye| heart| inner ear| intestine| joint| kidney| liver| lung| lymph node| mammary gland| muscle| ovary| oviduct| pancreas| pineal gland| pituitary gland| prostate| salivary gland| skin| spinal cord| spleen| stomach| testis| thymus| uterus| vagina|oocyte| cleavage| morula| bl…	NM_011678	GO:0006508	proteolysis	not recorded	NM_011678	GO:0005634	nucleus	not recorded	NM_011678	GO:0004221	ubiquitin thiolesterase activity	not recorded
TC0900001768.mm.1	-4.79	0.000113	-3.31	0.000737	-2.99	0.019862		TC0900001768.mm.1	Endod1	endonuclease domain containing 1	-	NM_028013	chr9	14353990 - 14381507	Coding		14353990	14381507	60	9|9 A3	71946	NM_028013	RefSeq	Mus musculus endonuclease domain containing 1 (Endod1), mRNA.	chr9	100	100	0		0	NM_028013	Q8C522	NM_028013	Mm.41423	bladder| bone| bone marrow| brain| dorsal root ganglion| embryonic tissue| eye| fertilized ovum| heart| inner ear| intestine| joint| kidney| liver| lung| mammary gland| molar| nasopharynx| olfactory mucosa| ovary| oviduct| pineal gland| pituitary gland| salivary gland| skin| spinal cord| spleen| stomach| sympathetic ganglion| thymus| tongue| vagina| unfertilized ovum| zygote| organogenesis| fetus…	NM_028013	GO:0008150	biological_process	no biological data available	NM_028013	GO:0005576	extracellular region	inferred from electronic annotation	NM_028013	GO:0003676	nucleic acid binding	inferred from electronic annotation
TC0900002824.mm.1	-2.56	0.005482	-3.22	0.003188	-2.03	0.011707		TC0900002824.mm.1	Gm16200	predicted gene 16200	-	ENSMUST00000120385	chr9	90221295 - 90221625	Pseudogene		90221295	90221625	30			ENSMUST00000120385	ENSEMBL	havana:known chromosome:GRCm38:9:90221295:90221625:-1 gene:ENSMUSG00000081520 gene_biotype:pseudogene transcript_biotype:processed_pseudogene	chr9	100	100	0		0
TC0900002922.mm.1	-5.3	0.008327	-4.36	0.00076	-3.41	0.003701		TC0900002922.mm.1	Armc8	armadillo repeat containing 8	-	NM_001166138	chr9	99478391 - 99568899	Coding		99478391	99568899	250	9|9 F1	74125	NM_001166138	RefSeq	Mus musculus armadillo repeat containing 8 (Armc8), transcript variant 2, mRNA.	chr9	100	100	0		0	NM_001166138	Q9DBR3	NM_001166138	Mm.234823	bladder| bone| bone marrow| brain| dorsal root ganglion| embryonic tissue| extraembryonic tissue| eye| fertilized ovum| heart| inner ear| intestine| kidney| liver| lung| lymph node| mammary gland| nasopharynx| ovary| pancreas| pineal gland| pituitary gland| prostate| skin| spinal cord| spleen| testis| thymus| unfertilized ovum| zygote| blastocyst| gastrula| organogenesis| fetus| neonate| juvenile…	NM_001166138	GO:0008150	biological_process	no biological data available	NM_001166138	GO:0005575	cellular_component	no biological data available	NM_001166138	GO:0003674	molecular_function	no biological data available
TC0900003074.mm.1	-3.24	2e-06	-2.96	0.000984	-3.92	5e-06		TC0900003074.mm.1	Tma7	translational machinery associated 7 homolog (S. cerevisiae)	-	NM_183250	chr9	109077988 - 109082381	Coding		109077988	109082381	53	9 F2|9	66167	NM_183250	RefSeq	Mus musculus translational machinery associated 7 homolog (S. cerevisiae) (Tma7), mRNA.	chr9	100	100	0		0	NM_183250	Q8K003	NM_183250	Mm.2395	blood| bone| bone marrow| brain| connective tissue| embryonic tissue| epididymis| extraembryonic tissue| eye| heart| intestine| kidney| liver| lung| lymph node| mammary gland| muscle| ovary| pancreas| pituitary gland| prostate| skin| spleen| stomach| testis| thymus| thyroid| tongue| uterus| cleavage| blastocyst| gastrula| organogenesis| fetus| neonate| juvenile| adult	NM_183250	GO:0008150	biological_process	no biological data available	NM_183250	GO:0005575	cellular_component	no biological data available	NM_183250	GO:0003674	molecular_function	no biological data available
TC0X00000067.mm.1	-8.22	0.002599	-12.89	0.002579	-5.96	0.002338		TC0X00000067.mm.1	Mir684-1	microRNA 684-1	+	uc012hej.1	chrX	7753089 - 7753173	Complex		7753089	7753173	30	2|2	735274	uc012hej.1	UCSC Genes	Mus musculus microRNA 684-1 (Mir684-1), microRNA.	chrX	100	100	0		0
TC0X00000110.mm.1	-3.85	5.6e-05	-3.08	0.000577	-2.41	0.014055		TC0X00000110.mm.1	Xk	Kell blood group precursor (McLeod phenotype) homolog	+	NM_023500	chrX	9272756 - 9313250	Coding		9272756	9313250	54	X A1.1|X 4.22 cM	22439	NM_023500	RefSeq	Mus musculus Kell blood group precursor (McLeod phenotype) homolog (Xk), mRNA.	chrX	100	100	0		0	NM_023500	Q9QXY7	NM_023500	Mm.56468	brain| embryonic tissue| inner ear| intestine| kidney| liver| lung| pancreas| prostate| testis| uterus| organogenesis| fetus| juvenile| adult	NM_023500	GO:0006810	transport	inferred from electronic annotation	NM_023500	GO:0016020	membrane	inferred from electronic annotation	ENSMUST00000015486	GO:0005515	protein binding	inferred from electronic annotation
TC0X00000113.mm.1	-4.69	0.000819	-3.82	0.001558	-2.52	0.006308		TC0X00000113.mm.1	Gm14863	predicted gene 14863	+	ENSMUST00000119648	chrX	9344026 - 9344332	Complex		9344026	9344332	30			ENSMUST00000119648	ENSEMBL	havana:known chromosome:GRCm38:X:9344026:9344332:1 gene:ENSMUSG00000083608 gene_biotype:pseudogene transcript_biotype:processed_pseudogene	chrX	100	100	0		0
TC0X00000864.mm.1	-3.63	0.000448	-3.78	0.000136	-3.2	0.037683		TC0X00000864.mm.1	Gm14788	predicted gene 14788	+	ENSMUST00000119457	chrX	91289277 - 91289651	Pseudogene		91289277	91289651	30			ENSMUST00000119457	ENSEMBL	havana:known chromosome:GRCm38:X:91289277:91289651:1 gene:ENSMUSG00000081235 gene_biotype:pseudogene transcript_biotype:processed_pseudogene	chrX	100	100	0		0
TC0X00001177.mm.1	-2.26	0.014831	-2.21	0.004415	-2.92	0.021812		TC0X00001177.mm.1	Gm14928	predicted gene 14928	+	ENSMUST00000120198	chrX	120178939 - 120179415	Pseudogene		120178939	120179415	30			ENSMUST00000120198	ENSEMBL	havana:known chromosome:GRCm38:X:120178939:120179415:1 gene:ENSMUSG00000082718 gene_biotype:pseudogene transcript_biotype:processed_pseudogene	chrX	100	100	0		0
TC0X00001369.mm.1	-4.86	0.000627	-3.98	0.000166	-2.13	0.0117		TC0X00001369.mm.1	Gm8061	predicted gene 8061	+	ENSMUST00000122380	chrX	139358468 - 139359257	Pseudogene		139358468	139359257	30			ENSMUST00000122380	ENSEMBL	havana:known chromosome:GRCm38:X:139358468:139359257:1 gene:ENSMUSG00000084205 gene_biotype:pseudogene transcript_biotype:processed_pseudogene	chrX	100	100	0		0
TC0X00002109.mm.1	-3.04	0.007134	-2.13	0.007305	-2.22	0.041317		TC0X00002109.mm.1			-		chrX	41800050 - 41801590	NonCoding		41800050	41801590	30			NONMMUT072215	NONCODE	Non-coding transcript identified by NONCODE: Sense No Exonic	chrX	100	100	0		0
TC0X00002757.mm.1	-5.96	0.001675	-5.39	0.000756	-3.88	0.034954		TC0X00002757.mm.1	Gm9115	predicted gene 9115	-	ENSMUST00000120192	chrX	102724402 - 102725749	Pseudogene		102724402	102725749	30			ENSMUST00000120192	ENSEMBL	havana:known chromosome:GRCm38:X:102724402:102725749:-1 gene:ENSMUSG00000080845 gene_biotype:pseudogene transcript_biotype:processed_pseudogene	chrX	100	100	0		0
TC0X00002886.mm.1	-3.78	0.001536	-2.7	0.012157	-2.65	0.040203		TC0X00002886.mm.1	Gm1866	predicted gene 1866	-	ENSMUST00000120701	chrX	114592048 - 114592524	Pseudogene		114592048	114592524	30			ENSMUST00000120701	ENSEMBL	ensembl_havana_transcript:known chromosome:GRCm38:X:114592048:114592524:-1 gene:ENSMUSG00000082070 gene_biotype:pseudogene transcript_biotype:processed_pseudogene	chrX	100	100	0		0
TC0X00003121.mm.1	-4.14	0.011725	-4.98	0.006038	-4.3	0.006986		TC0X00003121.mm.1	Gm8202	predicted gene 8202	-	ENSMUST00000117682	chrX	144236903 - 144237212	Complex		144236903	144237212	30			ENSMUST00000117682	ENSEMBL	havana:known chromosome:GRCm38:X:144236903:144237212:-1 gene:ENSMUSG00000084361 gene_biotype:pseudogene transcript_biotype:processed_pseudogene	chrX	100	100	0		0
TC0X00003125.mm.1	-2.53	8.4e-05	-2.87	0.006048	-2.19	0.040551		TC0X00003125.mm.1	Gm2214	predicted gene 2214	-	ENSMUST00000121333	chrX	144320926 - 144321255	Pseudogene		144320926	144321255	30			ENSMUST00000121333	ENSEMBL	havana:known chromosome:GRCm38:X:144320926:144321255:-1 gene:ENSMUSG00000080922 gene_biotype:pseudogene transcript_biotype:processed_pseudogene	chrX	100	100	0		0
TC1000000532.mm.1	-19.36	0.000174	-12.51	0.001148	-5.95	0.004083		TC1000000532.mm.1			+		chr10	59381959 - 59382719	NonCoding		59381959	59382719	30			KnowTID_00000728	Luo lincRNA	Non-coding transcript identified by Luo, et al.	chr10	100	100	0		0
TC1000001040.mm.1	-3.3	0.000284	-2.11	0.00785	-2.03	0.039873		TC1000001040.mm.1	Fbxo7	F-box protein 7	+	NM_153195	chr10	86021906 - 86051873	Complex		86021906	86051873	186	10 C1|10	69754	NM_153195	RefSeq	Mus musculus F-box protein 7 (Fbxo7), mRNA.	chr10	100	100	0		0	NM_153195	Q3U7U3	NM_153195	Mm.44236	bone| bone marrow| brain| dorsal root ganglion| embryonic tissue| extraembryonic tissue| eye| fertilized ovum| heart| intestine| joint| kidney| liver| mammary gland| ovary| pancreas| pituitary gland| salivary gland| skin| spinal cord| spleen| stomach| testis| thymus| tongue|oocyte| unfertilized ovum| zygote| blastocyst| gastrula| organogenesis| fetus| juvenile| adult	NM_153195	GO:0000422	mitochondrion degradation	not recorded	NM_153195	GO:0000151	ubiquitin ligase complex	not recorded	NM_153195	GO:0019901	protein kinase binding	inferred from physical interaction
TC1000001270.mm.1	-2.83	0.000264	-2.4	0.000321	-2.85	0.001193		TC1000001270.mm.1	Pawr	PRKC, apoptosis, WT1, regulator	+	NM_054056	chr10	108332189 - 108414391	Coding		108332189	108414391	90	10 D1|10	114774	NM_054056	RefSeq	Mus musculus PRKC, apoptosis, WT1, regulator (Pawr), mRNA.	chr10	100	100	0		0	NM_054056	Q925B0	NM_054056	Mm.391419	embryonic tissue| extraembryonic tissue| eye| inner ear| intestine| kidney| lung| mammary gland| ovary| pancreas| prostate| spinal cord| testis| thymus| tongue| morula| blastocyst| gastrula| organogenesis| fetus| neonate| juvenile| adult	NM_054056	GO:0006351	transcription, DNA-templated	inferred from electronic annotation	NM_054056	GO:0005634	nucleus	inferred from direct assay	NM_054056	GO:0003779	actin binding	not recorded
TC1000001650.mm.1	-8.22	0.002599	-12.89	0.002579	-5.96	0.002338		TC1000001650.mm.1	Mir684-1	microRNA 684-1	+	uc011xql.1	chr10	129665755 - 129665839	Complex		129665755	129665839	30	2|2	735274	uc011xql.1	UCSC Genes	Mus musculus microRNA 684-1 (Mir684-1), microRNA.	chr10	100	100	0		0
TC1000002187.mm.1	-7.68	0.000864	-8.59	0.001747	-2.73	0.045268		TC1000002187.mm.1	Rps8-ps1	ribosomal protein S8, pseudogene 1	-	ENSMUST00000172445	chr10	56354619 - 56355074	Pseudogene		56354619	56355074	30			ENSMUST00000172445	ENSEMBL	ensembl:known chromosome:GRCm38:10:56354619:56355074:-1 gene:ENSMUSG00000071303 gene_biotype:pseudogene transcript_biotype:processed_pseudogene	chr10	100	100	0		0
TC1000002729.mm.1	-4.27	0.000638	-3.01	0.004983	-2.68	0.027113		TC1000002729.mm.1	Nudt4	nudix (nucleoside diphosphate linked moiety X)-type motif 4	-	NM_027722	chr10	95547007 - 95564167	Coding		95547007	95564167	70	10|10	71207	NM_027722	RefSeq	Mus musculus nudix (nucleoside diphosphate linked moiety X)-type motif 4 (Nudt4), mRNA.	chr10	100	100	0		0	NM_027722	Q8R2U6	NM_027722	Mm.24397	adipose tissue| bladder| bone| bone marrow| brain| dorsal root ganglion| embryonic tissue| extraembryonic tissue| eye| fertilized ovum| heart| inner ear| intestine| kidney| liver| lung| mammary gland| molar| muscle| nasopharynx| ovary| pancreas| pituitary gland| prostate| salivary gland| skin| spleen| testis| thymus| tongue| unfertilized ovum| zygote| cleavage| morula| blastocyst| organogenesis| …	NM_027722	GO:0008152	metabolic process	inferred from electronic annotation	NM_027722	GO:0005737	cytoplasm	inferred from electronic annotation	NM_027722	GO:0003723	RNA binding	inferred from electronic annotation
TC1100000086.mm.1	-7.46	0.007115	-5.88	0.005028	-4.69	0.023523		TC1100000086.mm.1			+		chr11	6006288 - 6008328	NonCoding		6006288	6008328	30			uc007hxv.1	UCSC Genes	Mus musculus activated spleen cDNA, RIKEN full-length enriched library, clone:F830224N14 product:unclassifiable, full insert sequence.	chr11	100	100	0		0
TC1100000090.mm.1	-5.4	9.7e-05	-4.51	0.004324	-2.66	0.004516		TC1100000090.mm.1	Gm11401	predicted gene 11401	+	ENSMUST00000117212	chr11	6242378 - 6242721	Complex		6242378	6242721	30			ENSMUST00000117212	ENSEMBL	havana:known chromosome:GRCm38:11:6242378:6242721:1 gene:ENSMUSG00000081153 gene_biotype:pseudogene transcript_biotype:processed_pseudogene	chr11	100	100	0		0
TC1100000333.mm.1	-6.54	0.000568	-3.09	0.023066	-5.72	0.01209		TC1100000333.mm.1	Snrnp25	small nuclear ribonucleoprotein 25 (U11/U12)	+	NM_030093	chr11	32205415 - 32208996	Complex		32205415	32208996	77	11 A4|11	78372	NM_030093	RefSeq	Mus musculus small nuclear ribonucleoprotein 25 (U11/U12) (Snrnp25), mRNA.	chr11	100	100	0		0	NM_030093	Q8VIK1	NM_030093	Mm.29952	bladder| blood| bone| bone marrow| brain| embryonic tissue| extraembryonic tissue| eye| heart| intestine| liver| lung| lymph node| mammary gland| ovary| skin| stomach| sympathetic ganglion| testis| thymus| thyroid| gastrula| fetus| neonate| juvenile| adult	NM_030093	GO:0006397	mRNA processing	inferred from electronic annotation	NM_030093	GO:0005634	nucleus	not recorded	NM_030093	GO:0003674	molecular_function	no biological data available
TC1100000711.mm.1	-16.72	0.000244	-9.53	0.010234	-6.83	0.045007		TC1100000711.mm.1	Btnl10	butyrophilin-like 10	+	NM_138678	chr11	58917908 - 58927158	Coding		58917908	58927158	110	11 B1.3|11	192194	NM_138678	RefSeq	Mus musculus butyrophilin-like 10 (Btnl10), mRNA.	chr11	100	100	0		0	NM_138678	Q9JK39	NM_138678	Mm.22540	embryonic tissue| joint| spleen| testis| fetus| neonate| adult	NM_138678	GO:0008150	biological_process	no biological data available	NM_138678	GO:0016020	membrane	inferred from electronic annotation	NM_138678	GO:0003674	molecular_function	no biological data available
TC1100000771.mm.1	-7.98	0.002189	-5.24	0.001907	-5.1	0.00185		TC1100000771.mm.1	Map2k3	mitogen-activated protein kinase kinase 3	+	NM_008928	chr11	60932033 - 60952811	Complex		60932033	60952811	170	11 B2|11	26397	NM_008928	RefSeq	Mus musculus mitogen-activated protein kinase kinase 3 (Map2k3), mRNA.	chr11	100	100	0		0	NM_008928	O09110	NM_008928	Mm.18494	adrenal gland| bladder| blood| bone| bone marrow| brain| connective tissue| embryonic tissue| epididymis| extraembryonic tissue| eye| heart| inner ear| intestine| joint| kidney| liver| lung| lymph node| mammary gland| molar| muscle| ovary| pancreas| prostate| salivary gland| skin| spinal cord| spleen| stomach| testis| thymus| thyroid| tongue| uterus| vagina| cleavage| morula| blastocyst| egg cyli…	NM_008928	GO:0000165	MAPK cascade	inferred from direct assay	NM_008928	GO:0005622	intracellular	inferred from mutant phenotype	NM_008928	GO:0000166	nucleotide binding	inferred from electronic annotation	NM_008928	GenMAPP
TC1100000884.mm.1	-3.07	0.002814	-3.55	0.002876	-2.68	0.00275		TC1100000884.mm.1	Rpl26	ribosomal protein L26	+	NM_009080	chr11	68901566 - 68906989	Ribosomal		68901566	68906989	80	11 B3|11	19941	NM_009080	RefSeq	Mus musculus ribosomal protein L26 (Rpl26), mRNA.	chr11	100	100	0		0	NM_009080	P61255	NM_009080	Mm.306548	blood| bone marrow| brain| embryonic tissue| extraembryonic tissue| eye| heart| inner ear| intestine| joint| kidney| liver| lung| lymph node| mammary gland| molar| muscle| pancreas| prostate| spinal cord| spleen| stomach| testis| thymus| thyroid| cleavage| morula| blastocyst| egg cylinder| gastrula| organogenesis| fetus| neonate| juvenile| adult	NM_009080	GO:0006364	rRNA processing	not recorded	NM_009080	GO:0022625	cytosolic large ribosomal subunit	not recorded	NM_009080	GO:0044822	poly(A) RNA binding	not recorded
TC1100001619.mm.1	-7.4	8.8e-05	-4.41	0.000844	-2.12	0.000975		TC1100001619.mm.1	Gm11598	predicted gene 11598	+	ENSMUST00000119257	chr11	100243273 - 100243629	Pseudogene		100243273	100243629	30			ENSMUST00000119257	ENSEMBL	havana:known chromosome:GRCm38:11:100243273:100243629:1 gene:ENSMUSG00000082456 gene_biotype:pseudogene transcript_biotype:processed_pseudogene	chr11	100	100	0		0
TC1100002062.mm.1	-4.5	1.5e-05	-2.49	0.018643	-3.16	0.03191		TC1100002062.mm.1	Narf	nuclear prelamin A recognition factor	+	NM_026272	chr11	121237236 - 121255856	Complex		121237236	121255856	180	11 E2|11	67608	NM_026272	RefSeq	Mus musculus nuclear prelamin A recognition factor (Narf), mRNA.	chr11	100	100	0		0	NM_026272	Q9CYQ7	NM_026272	Mm.291832	blood| bone| bone marrow| brain| dorsal root ganglion| embryonic tissue| eye| heart| inner ear| kidney| liver| lung| mammary gland| molar| muscle| nasopharynx| olfactory mucosa| ovary| pituitary gland| skin| spinal cord| stomach| testis| thymus| thyroid| uterus|oocyte| cleavage| organogenesis| fetus| neonate| juvenile| adult	NM_026272	GO:0008150	biological_process	no biological data available	NM_026272	GO:0005634	nucleus	not recorded	NM_026272	GO:0005521	lamin binding	not recorded
TC1100002438.mm.1	-3.09	0.001473	-2.59	0.000127	-2.03	0.012911		TC1100002438.mm.1	Acyp2	acylphosphatase 2, muscle type	-	NM_029344	chr11	30505991 - 30649587	Coding		30505991	30649587	40	11 A4|11	75572	NM_029344	RefSeq	Mus musculus acylphosphatase 2, muscle type (Acyp2), mRNA.	chr11	100	100	0		0	NM_029344	P56375	NM_029344	Mm.390319	blood| brain| embryonic tissue| eye| heart| kidney| liver| mammary gland| spleen| testis| thymus| thyroid| tongue| fetus| juvenile| adult	NM_029344	GO:0008150	biological_process	no biological data available	NM_029344	GO:0005739	mitochondrion	inferred from direct assay	NM_029344	GO:0003998	acylphosphatase activity	not recorded
TC1100002606.mm.1	-12.96	0.000292	-8.82	0.000117	-5.47	0.002621		TC1100002606.mm.1	Gm12168	predicted gene 12168	-	ENSMUST00000119051	chr11	46450980 - 46451347	Complex		46450980	46451347	30			ENSMUST00000119051	ENSEMBL	havana:known chromosome:GRCm38:11:46450980:46451347:-1 gene:ENSMUSG00000082530 gene_biotype:pseudogene transcript_biotype:processed_pseudogene	chr11	100	100	0		0
TC1100002836.mm.1	-6.29	0.000421	-5.18	0.008096	-3.16	0.002797		TC1100002836.mm.1	Rnf187	ring finger protein 187	-	NM_022423	chr11	58932288 - 58938916	Coding		58932288	58938916	40	11|11 B2	108660	NM_022423	RefSeq	Mus musculus ring finger protein 187 (Rnf187), mRNA.	chr11	100	100	0		0	NM_022423	Q8BFX1	NM_022423	Mm.249986	adipose tissue| adrenal gland| bladder| blood| bone| bone marrow| brain| connective tissue| dorsal root ganglion| embryonic tissue| extraembryonic tissue| eye| fertilized ovum| heart| inner ear| intestine| joint| kidney| liver| lung| lymph node| mammary gland| muscle| nasopharynx| ovary| pancreas| pineal gland| pituitary gland| prostate| skin| spinal cord| spleen| stomach| sympathetic ganglion| t…	NM_022423	GO:0008284	positive regulation of cell proliferation	inferred from mutant phenotype	NM_022423	GO:0005634	nucleus	not recorded	NM_022423	GO:0004842	ubiquitin-protein transferase activity	not recorded
TC1100003211.mm.1	-8.22	0.002599	-12.89	0.002579	-5.96	0.002338		TC1100003211.mm.1	Mir684-1	microRNA 684-1	-	uc011xzf.1	chr11	75065907 - 75065991	Complex		75065907	75065991	30	2|2	735274	uc011xzf.1	UCSC Genes	Mus musculus microRNA 684-1 (Mir684-1), microRNA.	chr11	100	100	0		0
TC1100003428.mm.1	-2.59	0.011722	-2.56	0.034642	-3.38	0.001577		TC1100003428.mm.1	Bcas3os1	breast carcinoma amplified sequence 3, opposite strand 1	-	NR_045875	chr11	85702200 - 85719744	NonCoding		85702200	85719744	90	11 C|11	71489	NR_045875	RefSeq	Mus musculus breast carcinoma amplified sequence 3, opposite strand 1 (Bcas3os1), long non-coding RNA.	chr11	100	100	0		0	NR_045875	Q3UV40	NR_045875	Mm.442482	bone| embryonic tissue| eye| lung| morula| fetus| neonate| adult
TC1100004035.mm.1	-5.39	0.001653	-4.32	0.000322	-2.72	0.032465		TC1100004035.mm.1	Fam104a	family with sequence similarity 104, member A	-	NM_138598	chr11	113661319 - 113684155	Coding		113661319	113684155	70	11 E2|11 79.12 cM	28081	NM_138598	RefSeq	Mus musculus family with sequence similarity 104, member A (Fam104a), mRNA.	chr11	100	100	0		0	NM_138598	Q3TY58	NM_138598	Mm.351688	blood| bone| bone marrow| brain| connective tissue| embryonic tissue| extraembryonic tissue| eye| heart| intestine| joint| kidney| liver| lung| mammary gland| muscle| ovary| pancreas| pineal gland| pituitary gland| salivary gland| skin| spinal cord| spleen| stomach| testis| thymus| thyroid| uterus|oocyte| cleavage| gastrula| organogenesis| fetus| neonate| juvenile| adult	NM_138598	GO:0008150	biological_process	no biological data available	NM_138598	GO:0005575	cellular_component	no biological data available	NM_138598	GO:0003674	molecular_function	no biological data available
TC1200000142.mm.1	-3.52	0.005347	-3.62	0.002993	-3.65	0.015878		TC1200000142.mm.1	Odc1	ornithine decarboxylase, structural 1	+	NM_013614	chr12	17544873 - 17551502	Coding		17544873	17551502	140	12 A1.1|12 8.11 cM	18263	NM_013614	RefSeq	Mus musculus ornithine decarboxylase, structural 1 (Odc1), mRNA.	chr12	100	100	0		0	NM_013614	P00860	NM_013614	Mm.34102	adrenal gland| bladder| blood| bone| bone marrow| brain| connective tissue| dorsal root ganglion| embryonic tissue| epididymis| extraembryonic tissue| eye| fertilized ovum| heart| inner ear| intestine| kidney| liver| lung| mammary gland| muscle| nasopharynx| ovary| pancreas| pituitary gland| prostate| skin| spinal cord| spleen| stomach| testis| thymus| thyroid| tongue|oocyte| zygote| cleavage| mo…	NM_013614	GO:0001822	kidney development	inferred from mutant phenotype	NM_013614	GO:0005737	cytoplasm	not recorded	NM_013614	GO:0003824	catalytic activity	inferred from electronic annotation
TC1200000627.mm.1	-4.73	0.00814	-2.61	0.045175	-3.85	0.019224		TC1200000627.mm.1			+		chr12	72789012 - 72789474	NonCoding		72789012	72789474	30			NONMMUT014603	NONCODE	Non-coding transcript identified by NONCODE: Sense No Exonic	chr12	100	100	0		0
TC1200000760.mm.1	-5.54	0.000795	-5.39	2.3e-05	-4.29	0.001184		TC1200000760.mm.1	Ttc9	tetratricopeptide repeat domain 9	+	NM_001033149	chr12	81631369 - 81668097	Complex		81631369	81668097	100	12 D1|12	69480	NM_001033149	RefSeq	Mus musculus tetratricopeptide repeat domain 9 (Ttc9), mRNA.	chr12	100	100	0		0	NM_001033149	Q3V038	NM_001033149	Mm.130002	bladder| brain| dorsal root ganglion| embryonic tissue| eye| joint| liver| mammary gland| muscle| nasopharynx| pancreas| skin| spinal cord| testis| thyroid| uterus| organogenesis| fetus| neonate| juvenile| adult	NM_001033149	GO:0018208	peptidyl-proline modification	not recorded	NM_001033149	GO:0016020	membrane	not recorded	NM_001033149	GO:0003755	peptidyl-prolyl cis-trans isomerase activity	not recorded
TC1200001051.mm.1	-5.76	0.000525	-2.34	0.038156	-2.87	0.000866		TC1200001051.mm.1	Glrx5	glutaredoxin 5 homolog (S. cerevisiae)	+	NM_028419	chr12	105032669 - 105040910	Coding		105032669	105040910	30	12 E|12	73046	NM_028419	RefSeq	Mus musculus glutaredoxin 5 homolog (S. cerevisiae) (Glrx5), mRNA.	chr12	100	100	0		0	NM_028419	Q80Y14	NM_028419	Mm.490286	bone marrow| brain| embryonic tissue| extraembryonic tissue| eye| fertilized ovum| kidney| lung| mammary gland| ovary| pancreas| skin| spinal cord| sympathetic ganglion| thymus| uterus|oocyte| zygote| morula| gastrula| organogenesis| fetus| neonate| juvenile| adult	NM_028419	GO:0045454	cell redox homeostasis	inferred from electronic annotation	NM_028419	GO:0005634	nucleus	not recorded	NM_028419	GO:0009055	electron carrier activity	inferred from electronic annotation
TC1200001875.mm.1	-5.12	0.000345	-3.05	0.000984	-4.04	0.005786		TC1200001875.mm.1	Cdkl1	cyclin-dependent kinase-like 1 (CDC2-related kinase)	-	NM_183294	chr12	69746848 - 69790707	Coding		69746848	69790707	110	12 C2|12	71091	NM_183294	RefSeq	Mus musculus cyclin-dependent kinase-like 1 (CDC2-related kinase) (Cdkl1), mRNA.	chr12	100	100	0		0	NM_183294	Q8CEQ0	NM_183294	Mm.132325	bladder| bone| brain| heart| kidney| liver| lung| muscle| spinal cord| testis| thymus| neonate| juvenile| adult	NM_183294	GO:0006468	protein phosphorylation	inferred from electronic annotation	NM_183294	GO:0005634	nucleus	inferred from electronic annotation	NM_183294	GO:0000166	nucleotide binding	inferred from electronic annotation
TC1200001953.mm.1	-11.93	4.5e-05	-2.47	0.012195	-4.6	0.048601		TC1200001953.mm.1	Sptb	spectrin beta, erythrocytic	-	NM_013675	chr12	76580488 - 76710547	Complex		76580488	76710547	419	12 C3|12 33.73 cM	20741	NM_013675	RefSeq	Mus musculus spectrin beta, erythrocytic (Sptb), mRNA.	chr12	100	100	0		0	NM_013675	P15508	NM_013675	Mm.32881	brain| embryonic tissue| eye| heart| liver| lung| mammary gland| pineal gland| spinal cord| organogenesis| fetus| juvenile| adult	NM_013675	GO:0006779	porphyrin-containing compound biosynthetic process	inferred from mutant phenotype	NM_013675	GO:0005737	cytoplasm	not recorded	NM_013675	GO:0003779	actin binding	inferred from direct assay
TC1200002251.mm.1	-3.58	0.012344	-3.51	0.018878	-3.64	0.013049		TC1200002251.mm.1	Lgmn	legumain	-	NM_011175	chr12	102394084 - 102439813	Complex		102394084	102439813	180	12 E|12	19141	NM_011175	RefSeq	Mus musculus legumain (Lgmn), mRNA.	chr12	100	100	0		0	NM_011175	O89017	NM_011175	Mm.17185	blood| bone| bone marrow| brain| embryonic tissue| extraembryonic tissue| eye| heart| inner ear| intestine| kidney| liver| lung| mammary gland| muscle| nasopharynx| ovary| pineal gland| pituitary gland| prostate| salivary gland| skin| spleen| thymus|oocyte| unfertilized ovum| gastrula| organogenesis| fetus| neonate| juvenile| adult	NM_011175	GO:0003014	renal system process	inferred from mutant phenotype	NM_011175	GO:0005764	lysosome	inferred from direct assay	NM_011175	GO:0004197	cysteine-type endopeptidase activity	inferred from direct assay
TC1200002627.mm.1	-7.53	0.007691	-2.99	0.001854	-8.62	0.002219		TC1200002627.mm.1	Ighv8-5	immunoglobulin heavy variable V8-5	-	ENSMUST00000103520	chr12	115067560 - 115067996	Coding		115067560	115067996	20			ENSMUST00000103520	ENSEMBL	ensembl_ig_gene:known chromosome:GRCm38:12:115067576:115067996:-1 gene:ENSMUSG00000095120 gene_biotype:IG_LV_gene transcript_biotype:IG_LV_gene	chr12	100	100	0		0														ENSMUST00000103520	GO:0005515	protein binding	inferred from electronic annotation
TC1300000332.mm.1	-3.42	0.003603	-3.54	0.001755	-2.22	0.044663		TC1300000332.mm.1	Agtr1a	angiotensin II receptor, type 1a	+	NM_177322	chr13	30336356 - 30382867	Complex		30336356	30382867	50	13 A3.2|13 13.19 cM	11607	NM_177322	RefSeq	Mus musculus angiotensin II receptor, type 1a (Agtr1a), mRNA.	chr13	100	100	0		0	NM_177322	P29754	NM_177322	Mm.35062	adrenal gland| bladder| brain| embryonic tissue| epididymis| extraembryonic tissue| heart| intestine| kidney| liver| lung| mammary gland| oviduct| pancreas| pituitary gland| skin| spinal cord| thymus| uterus| vagina| gastrula| fetus| neonate| juvenile| adult					NM_177322	GO:0005623	cell	inferred from mutant phenotype	NM_177322	GO:0001596	angiotensin type I receptor activity	inferred from direct assay	NM_177322	GenMAPP
TC1300000762.mm.1	-2.47	0.00801	-2.38	0.000724	-2.07	0.003826		TC1300000762.mm.1	Gm25448	predicted gene, 25448	+	ENSMUST00000180065	chr13	62791507 - 62791613	NonCoding		62791507	62791613	30			ENSMUST00000180065	ENSEMBL	ncrna:known chromosome:GRCm38:13:62791507:62791613:1 gene:ENSMUSG00000095825 gene_biotype:snRNA transcript_biotype:snRNA	chr13	100	100	0		0
TC1300000797.mm.1	-3	0.006509	-3.2	0.001516	-3.94	0.016211		TC1300000797.mm.1			+		chr13	65639788 - 65780463	NonCoding		65639788	65780463	40			KnowTID_00001835	Luo lincRNA	Non-coding transcript identified by Luo, et al.	chr13	100	100	0		0
TC1300000799.mm.1	-2.86	0.024051	-3.25	0.000344	-5.31	0.00061		TC1300000799.mm.1	Gm26758	predicted gene, 26758	+	ENSMUST00000180834	chr13	65780905 - 65867305	NonCoding		65780905	65867305	18			ENSMUST00000180834	ENSEMBL	ensembl_lincrna:known chromosome:GRCm38:13:65780905:65867305:1 gene:ENSMUSG00000097066 gene_biotype:lincRNA transcript_biotype:lincRNA	chr13	100	100	0		0
TC1300000800.mm.1	-3.61	0.022439	-2.3	0.003779	-5.7	0.018677		TC1300000800.mm.1	Zfp640	zinc finger protein 640	+	uc007qzl.1	chr13	65897172 - 65906582	NonCoding		65897172	65906582	40	13 B3|13	386626	uc007qzl.1	UCSC Genes	Mus musculus blastocyst blastocyst cDNA, RIKEN full-length enriched library, clone:I1C0013E13 product:hypothetical Zn-finger, C2H2 type/KRAB box containing protein, full insert sequence.	chr13	100	100	0		0	uc007qzl.1	E9Q1C9	uc007qzl.1	Mm.425832	embryonic tissue| testis	uc007qzl.1	GO:0006355	regulation of transcription, DNA-templated	not recorded	uc007qzl.1	GO:0005575	cellular_component	no biological data available	uc007qzl.1	GO:0003700	sequence-specific DNA binding transcription factor activity	not recorded
TC1300000804.mm.1	-2.17	0.020875	-2.11	0.005676	-3.45	0.012376		TC1300000804.mm.1	LOC100861707	zinc finger protein 120-like	+	XM_003688900	chr13	66155899 - 66177669	Complex		66155899	66177669	90		100861707	XM_003688900	RefSeq	[retired] PREDICTED: Mus musculus zinc finger protein 120-like (LOC100861707), mRNA.	chr13	100	100	0		0
TC1300000806.mm.1	-2.55	0.002007	-2.58	0.000636	-2.78	0.009911		TC1300000806.mm.1	Gm26754	predicted gene, 26754	+	ENSMUST00000180403	chr13	66244216 - 66305344	NonCoding		66244216	66305344	70			ENSMUST00000180403	ENSEMBL	ensembl_lincrna:known chromosome:GRCm38:13:66244216:66264522:1 gene:ENSMUSG00000097849 gene_biotype:lincRNA transcript_biotype:lincRNA	chr13	100	100	0		0
TC1300000808.mm.1	-3.71	0.003412	-2.91	0.002815	-2.19	0.04809		TC1300000808.mm.1			+		chr13	66488211 - 66498570	NonCoding		66488211	66498570	30			KnowTID_00001845	Luo lincRNA	Non-coding transcript identified by Luo, et al.	chr13	100	100	0		0
TC1300000912.mm.1	-6.81	0.000255	-3.2	0.000609	-4.03	0.000539		TC1300000912.mm.1	Ell2	elongation factor RNA polymerase II 2	+	NM_138953	chr13	75707484 - 75772361	Coding		75707484	75772361	150	13 C1|13	192657	NM_138953	RefSeq	Mus musculus elongation factor RNA polymerase II 2 (Ell2), mRNA.	chr13	100	100	0		0	NM_138953	Q3UKU1	NM_138953	Mm.21288	blood| bone marrow| brain| embryonic tissue| extraembryonic tissue| eye| intestine| kidney| liver| lung| lymph node| mammary gland| pancreas| salivary gland| skin| spleen| testis| thymus| uterus| cleavage| morula| fetus| neonate| juvenile| adult	NM_138953	GO:0006351	transcription, DNA-templated	inferred from electronic annotation	NM_138953	GO:0005634	nucleus	not recorded
TC1300000919.mm.1	-7.52	0.003069	-8.87	1.4e-05	-11.73	0.002103		TC1300000919.mm.1	Glrx	glutaredoxin	+	NM_053108	chr13	75839868 - 75850151	Coding		75839868	75850151	40	13 C1|13 40.95 cM	93692	NM_053108	RefSeq	Mus musculus glutaredoxin (Glrx), mRNA.	chr13	100	100	0		0	NM_053108	Q9QUH0	NM_053108	Mm.25844	bone| bone marrow| brain| embryonic tissue| extraembryonic tissue| eye| fertilized ovum| heart| intestine| joint| kidney| liver| lung| lymph node| mammary gland| muscle| ovary| pancreas| pituitary gland| skin| spinal cord| spleen| stomach| testis| thymus| thyroid| tongue| uterus| vagina|oocyte| unfertilized ovum| zygote| morula| blastocyst| gastrula| organogenesis| fetus| neonate| juvenile| adult	NM_053108	GO:0006810	transport	inferred from electronic annotation	NM_053108	GO:0005634	nucleus	inferred from direct assay	NM_053108	GO:0009055	electron carrier activity	inferred from electronic annotation
TC1300001211.mm.1	-6.4	0.003604	-7.35	0.006379	-4.56	0.033146		TC1300001211.mm.1	Rps3a3	ribosomal protein S3A3	+	ENSMUST00000074680	chr13	108670580 - 108671440	Ribosomal		108670580	108671440	30			ENSMUST00000074680	ENSEMBL	havana:known chromosome:GRCm38:13:108670603:108671397:1 gene:ENSMUSG00000059751 gene_biotype:pseudogene transcript_biotype:processed_pseudogene	chr13	100	100	0		0	ENSMUST00000074680	D3Z7W7				ENSMUST00000074680	GO:0006412	translation	inferred from electronic annotation	ENSMUST00000074680	GO:0022627	cytosolic small ribosomal subunit	inferred from electronic annotation	ENSMUST00000074680	GO:0003735	structural constituent of ribosome	inferred from electronic annotation
TC1300001326.mm.1	-12.73	0.001414	-12.25	0.000343	-13.44	0.002392		TC1300001326.mm.1	Emb	embigin	+	NM_010330	chr13	117220573 - 117274415	Coding		117220573	117274415	120	13 D2.3|13	13723	NM_010330	RefSeq	Mus musculus embigin (Emb), mRNA.	chr13	100	100	0		0	NM_010330	P21995	NM_010330	Mm.274926	bladder| blood| bone| bone marrow| brain| connective tissue| embryonic tissue| epididymis| extraembryonic tissue| eye| fertilized ovum| heart| inner ear| joint| kidney| liver| lung| lymph node| mammary gland| molar| muscle| nasopharynx| ovary| oviduct| pancreas| pituitary gland| prostate| skin| spinal cord| spleen| sympathetic ganglion| testis| thymus| thyroid| turbinate| uterus| vagina| unfertil…	NM_010330	GO:0007155	cell adhesion	not recorded	NM_010330	GO:0005886	plasma membrane	inferred from electronic annotation	NM_010330	GO:0097159	organic cyclic compound binding	inferred from electronic annotation
TC1300001396.mm.1	-3.64	0.001593	-4.58	0.016129	-2.47	0.021631		TC1300001396.mm.1	Gm10029	predicted gene 10029	-	XM_001473099	chr13	6662562 - 6662894	Pseudogene		6662562	6662894	30	13 A1|13	100039532	XM_001473099	RefSeq	PREDICTED: Mus musculus predicted gene 10029 (Gm10029), mRNA.	chr13	100	100	0		0
TC1300001928.mm.1	-2.33	0.00059	-2.26	0.003356	-2.33	0.025058		TC1300001928.mm.1	Dek	DEK oncogene (DNA binding)	-	NM_025900	chr13	47084767 - 47106221	Complex		47084767	47106221	150	13 B1|13 24.5 cM	110052	NM_025900	RefSeq	Mus musculus DEK oncogene (DNA binding) (Dek), mRNA.	chr13	100	100	0		0	NM_025900	Q7TNV0	NM_025900	Mm.131150	adrenal gland| bladder| blood| bone marrow| brain| dorsal root ganglion| embryonic tissue| extraembryonic tissue| eye| fertilized ovum| heart| inner ear| intestine| kidney| liver| lung| lymph node| mammary gland| molar| muscle| ovary| pancreas| prostate| salivary gland| skin| spleen| stomach| sympathetic ganglion| testis| thymus| thyroid| uterus|oocyte| unfertilized ovum| zygote| cleavage| morula…	NM_025900	GO:0016568	chromatin modification	inferred from electronic annotation	NM_025900	GO:0005634	nucleus	not recorded	NM_025900	GO:0003676	nucleic acid binding	inferred from electronic annotation
TC1300002140.mm.1	-3.36	0.000322	-3.79	0.008165	-3.73	0.007843		TC1300002140.mm.1	4930486L24Rik	RIKEN cDNA 4930486L24 gene	-	NM_178098	chr13	60842612 - 60864416	Coding		60842612	60864416	80	13 B2|13	214639	NM_178098	RefSeq	Mus musculus RIKEN cDNA 4930486L24 gene (4930486L24Rik), mRNA.	chr13	100	100	0		0	NM_178098	Q80UB0	NM_178098	Mm.19839	bone marrow| extraembryonic tissue| lymph node| testis| uterus| juvenile| adult	NM_178098	GO:0006508	proteolysis	inferred from electronic annotation	NM_178098	GO:0005576	extracellular region	inferred from electronic annotation	NM_178098	GO:0008234	cysteine-type peptidase activity	inferred from electronic annotation
TC1300002216.mm.1	-3.59	0.003114	-4.04	2e-05	-6.03	0.002931		TC1300002216.mm.1			-		chr13	65379421 - 65452728	NonCoding		65379421	65452728	23			NONMMUT018016	NONCODE	Non-coding transcript identified by NONCODE: Linc	chr13	100	100	0		0
TC1300002218.mm.1	-6.29	0.004679	-3.85	0.000483	-4.63	0.006548		TC1300002218.mm.1			-		chr13	65491797 - 65496793	NonCoding		65491797	65496793	30			NONMMUT018022	NONCODE	Non-coding transcript identified by NONCODE: Linc	chr13	100	100	0		0
TC1300002219.mm.1	-2.75	0.027948	-2.01	0.00029	-4.63	0.015831		TC1300002219.mm.1			-		chr13	65660143 - 65699184	NonCoding		65660143	65699184	60			KnowTID_00002091	Luo lincRNA	Non-coding transcript identified by Luo, et al.	chr13	100	100	0		0
TC1300002224.mm.1	-3.57	0.002767	-4.92	2.6e-05	-8.52	0.012558		TC1300002224.mm.1			-		chr13	66161348 - 66161755	NonCoding		66161348	66161755	30			KnowTID_00002095	Luo lincRNA	Non-coding transcript identified by Luo, et al.	chr13	100	100	0		0
TC1300002225.mm.1	-3.99	0.00281	-2.41	0.000735	-2.75	0.001919		TC1300002225.mm.1	Gm17514	predicted gene, 17514	-	ENSMUST00000181863	chr13	66183079 - 66203636	NonCoding		66183079	66203636	40			ENSMUST00000181863	ENSEMBL	ensembl_lincrna:known chromosome:GRCm38:13:66183079:66203636:-1 gene:ENSMUSG00000097118 gene_biotype:lincRNA transcript_biotype:lincRNA	chr13	100	100	0		0
TC1300002226.mm.1	-2.98	0.021535	-2.44	0.000395	-3.86	0.002828		TC1300002226.mm.1	Gm10772	predicted gene 10772	-	ENSMUST00000167981	chr13	66227319 - 66227573	Coding		66227319	66227573	30			ENSMUST00000167981	ENSEMBL	ensembl:known chromosome:GRCm38:13:66227319:66227573:-1 gene:ENSMUSG00000091347 gene_biotype:protein_coding transcript_biotype:protein_coding	chr13	100	100	0		0	ENSMUST00000167981	F7AIG4				ENSMUST00000167981	GO:0008150	biological_process	no biological data available	ENSMUST00000167981	GO:0005575	cellular_component	no biological data available	ENSMUST00000167981	GO:0003674	molecular_function	no biological data available
TC1300002770.mm.1	-3.42	0.008004	-2.81	0.000587	-5.32	0.005255		TC1300002770.mm.1	2410141K09Rik	RIKEN cDNA 2410141K09 gene	-	NM_183119	chr13	66418114 - 66441131	Complex		66418114	66441131	123	13 B3|13	76803	NM_183119	RefSeq	Mus musculus RIKEN cDNA 2410141K09 gene (2410141K09Rik), transcript variant 2, mRNA.	chr13	100	100	0		0	NM_183119	G3UY85	NM_183119	Mm.183391	embryonic tissue| testis| adult	NM_183119	GO:0008150	biological_process	no biological data available	NM_183119	GO:0005575	cellular_component	no biological data available	NM_183119	GO:0046872	metal ion binding	inferred from electronic annotation
TC1300002771.mm.1	-2.72	0.004952	-2.33	9.6e-05	-2.99	0.012589		TC1300002771.mm.1			-		chr13	66734812 - 66753053	NonCoding		66734812	66753053	90			KnowTID_00002115	Luo lincRNA	Non-coding transcript identified by Luo, et al.	chr13	100	100	0		0
TC1300002228.mm.1	-3.13	0.021284	-2.53	0.006576	-4.43	0.014329		TC1300002228.mm.1	Zfp640	zinc finger protein 640	-	ENSMUST00000071320	chr13	66282476 - 66698234	Complex		66282476	66698234	106			ENSMUST00000071320	ENSEMBL	ensembl:known chromosome:GRCm38:13:66670769:66673330:-1 gene:ENSMUSG00000074830 gene_biotype:protein_coding transcript_biotype:protein_coding	chr13	100	100	0		0	ENSMUST00000071320	L7N452	uc007qzs.1	Mm.425832	embryonic tissue| testis	ENSMUST00000071320	GO:0006355	regulation of transcription, DNA-templated	inferred from electronic annotation	ENSMUST00000071320	GO:0005622	intracellular	inferred from electronic annotation	ENSMUST00000071320	GO:0003674	molecular_function	no biological data available
TC1300002230.mm.1	-2.27	0.019399	-2.19	0.011341	-2.05	0.027637		TC1300002230.mm.1			-		chr13	66540136 - 66542366	NonCoding		66540136	66542366	30			KnowTID_00002098	Luo lincRNA	Non-coding transcript identified by Luo, et al.	chr13	100	100	0		0
TC1300002235.mm.1	-3.09	0.018102	-2.3	0.011278	-4.85	0.019468		TC1300002235.mm.1	Zfp640	zinc finger protein 640	-	ENSMUST00000079229	chr13	66852174 - 66854872	Coding		66852174	66854872	40	13 B3|13	386626	ENSMUST00000079229	ENSEMBL	ensembl:known chromosome:GRCm38:13:66852174:66854872:-1 gene:ENSMUSG00000071295 gene_biotype:protein_coding transcript_biotype:protein_coding	chr13	100	100	0		0	ENSMUST00000079229	E9Q1C9	ENSMUST00000079229	Mm.425832	embryonic tissue| testis	ENSMUST00000079229	GO:0006355	regulation of transcription, DNA-templated	not recorded	ENSMUST00000079229	GO:0005622	intracellular	inferred from electronic annotation	ENSMUST00000079229	GO:0003700	sequence-specific DNA binding transcription factor activity	not recorded
TC1300002491.mm.1	-4.28	0.044349	-5.94	0.012667	-4.46	0.035182		TC1300002491.mm.1	Gm10260	predicted gene 10260	-	ENSMUST00000074072	chr13	97760130 - 97760588	Coding		97760130	97760588	30			ENSMUST00000074072	ENSEMBL	ensembl:known chromosome:GRCm38:13:97760130:97760588:-1 gene:ENSMUSG00000069117 gene_biotype:protein_coding transcript_biotype:protein_coding	chr13	100	100	0		0	ENSMUST00000074072	F6YVP7				ENSMUST00000074072	GO:0006412	translation	inferred from electronic annotation	ENSMUST00000074072	GO:0005622	intracellular	inferred from electronic annotation	ENSMUST00000074072	GO:0003676	nucleic acid binding	inferred from electronic annotation
TC1400000316.mm.1	-3.12	0.002717	-4.8	0.000497	-3.03	5e-05		TC1400000316.mm.1	Mustn1	musculoskeletal, embryonic nuclear protein 1	+	NM_181390	chr14	30879257 - 30881610	Coding		30879257	30881610	50	14 B|14	66175	NM_181390	RefSeq	Mus musculus musculoskeletal, embryonic nuclear protein 1 (Mustn1), mRNA.	chr14	100	100	0		0	NM_181390	Q99JI1	NM_181390	Mm.220895	embryonic tissue| extraembryonic tissue| heart| intestine| joint| liver| mammary gland| muscle| prostate| stomach| thyroid| tongue| uterus| organogenesis| fetus| neonate| juvenile| adult	NM_181390	GO:0042060	wound healing	not recorded	NM_181390	GO:0005634	nucleus	not recorded	NM_181390	GO:0003674	molecular_function	no biological data available
TC1400000720.mm.1	-14.71	0.000479	-15.14	0.001554	-10.01	6.4e-05		TC1400000720.mm.1	Trdj1	T cell receptor delta joining 1	+	ENSMUST00000103682	chr14	54122274 - 54146163	Complex		54122274	54146163	90			ENSMUST00000103682	ENSEMBL	ensembl_ig_gene:known chromosome:GRCm38:14:54123138:54123188:1 gene:ENSMUSG00000076870 gene_biotype:IG_J_gene transcript_biotype:IG_J_gene	chr14	100	100	0		0	uc007ttx.1	Q8CA13	ENSMUST00000103682	Mm.464359
TC1400000721.mm.1	-3.49	0.001406	-2.95	0.002471	-2.07	0.019484		TC1400000721.mm.1			+		chr14	54146776 - 54148868	NonCoding		54146776	54148868	30			NONMMUT020845	NONCODE	Non-coding transcript identified by NONCODE: Linc	chr14	100	100	0		0
TC1400002147.mm.1	-3.41	0.003388	-3.29	0.005465	-3.08	0.014932		TC1400002147.mm.1			-		chr14	57577775 - 57580596	NonCoding		57577775	57580596	30			KnowTID_00002479	Luo lincRNA	Non-coding transcript identified by Luo, et al.	chr14	100	100	0		0
TC1400002400.mm.1	-4.04	0.00432	-3.33	0.002725	-2.68	0.020516		TC1400002400.mm.1	Gm6984	predicted gene 6984	-	ENSMUST00000081138	chr14	73953922 - 73955586	Pseudogene		73953922	73955586	30			ENSMUST00000081138	ENSEMBL	[retired] cdna:pseudogene chromosome:GRCm38:14:73953922:73955586:-1 gene:ENSMUSG00000057886 gene_biotype:pseudogene transcript_biotype:processed_pseudogene	chr14	100	100	0		0	ENSMUST00000181108	P23198	ENSMUST00000181108	Mm.280968	bone marrow| brain| dorsal root ganglion| embryonic tissue| extraembryonic tissue| eye| kidney| liver| lung| mammary gland| pancreas| skin| spinal cord| sympathetic ganglion| testis| thymus| cleavage| blastocyst| egg cylinder| gastrula| organogenesis| fetus| neonate| juvenile| adult	ENSMUST00000181108	GO:0045892	negative regulation of transcription, DNA-templated	inferred from direct assay	ENSMUST00000181108	GO:0000785	chromatin	inferred from direct assay	ENSMUST00000181108	GO:0005515	protein binding	inferred from physical interaction	ENSMUST00000181108	GenMAPP
TC1400002521.mm.1	-5.02	0.003048	-5.18	0.015432	-3.91	0.033723		TC1400002521.mm.1	Rps3a2	ribosomal protein S3A2	-	ENSMUST00000074245	chr14	88122971 - 88123833	Ribosomal		88122971	88123833	30			ENSMUST00000074245	ENSEMBL	havana:known chromosome:GRCm38:14:88123017:88123808:-1 gene:ENSMUSG00000062611 gene_biotype:pseudogene transcript_biotype:processed_pseudogene	chr14	100	100	0		0	ENSMUST00000074245	D3Z6C3				ENSMUST00000074245	GO:0006412	translation	inferred from electronic annotation	ENSMUST00000074245	GO:0022627	cytosolic small ribosomal subunit	inferred from electronic annotation	ENSMUST00000074245	GO:0003735	structural constituent of ribosome	inferred from electronic annotation
TC1400002598.mm.1	-5.33	0.002909	-6.67	0.000663	-6.38	0.002409		TC1400002598.mm.1	Mzt1	mitotic spindle organizing protein 1	-	NM_175245	chr14	99034544 - 99046136	Coding		99034544	99046136	41	14 E2.2|14	76789	NM_175245	RefSeq	Mus musculus mitotic spindle organizing protein 1 (Mzt1), mRNA.	chr14	100	100	0		0	NM_175245	Q8BUR9	NM_175245	Mm.38912	adrenal gland| bladder| bone| bone marrow| brain| connective tissue| dorsal root ganglion| embryonic tissue| extraembryonic tissue| eye| fertilized ovum| heart| inner ear| kidney| liver| lung| mammary gland| muscle| nasopharynx| ovary| oviduct| pancreas| pituitary gland| salivary gland| skin| spleen| stomach| testis| thymus| thyroid|oocyte| zygote| blastocyst| organogenesis| fetus| neonate| juven…	NM_175245	GO:0033566	gamma-tubulin complex localization	not recorded	NM_175245	GO:0005737	cytoplasm	inferred from electronic annotation	NM_175245	GO:0003674	molecular_function	no biological data available
TC1500000175.mm.1	-5.6	0.000303	-2.56	0.000687	-2.28	0.017121		TC1500000175.mm.1	Ank	progressive ankylosis	+	NM_020332	chr15	27466677 - 27594909	Complex		27466677	27594909	160	15 B1|15 10.23 cM	11732	NM_020332	RefSeq	Mus musculus progressive ankylosis (Ank), mRNA.	chr15	100	100	0		0	NM_020332	Q9JHZ2	NM_020332	Mm.265264	bladder| bone| bone marrow| brain| dorsal root ganglion| embryonic tissue| extraembryonic tissue| eye| fertilized ovum| heart| inner ear| intestine| kidney| liver| lung| mammary gland| muscle| nasopharynx| ovary| oviduct| pancreas| pituitary gland| prostate| salivary gland| skin| spinal cord| spleen| sympathetic ganglion| testis| thymus| uterus| vagina| zygote| morula| blastocyst| gastrula| organ…	NM_020332	GO:0006810	transport	inferred from electronic annotation	NM_020332	GO:0005886	plasma membrane	inferred from direct assay	NM_020332	GO:0005315	inorganic phosphate transmembrane transporter activity	not recorded
TC1500000492.mm.1	-9.09	0.001699	-7.42	0.010948	-5.36	0.001714		TC1500000492.mm.1			+		chr15	67025447 - 67030555	NonCoding		67025447	67030555	30			NONMMUT023815	NONCODE	Non-coding transcript identified by NONCODE: Linc	chr15	100	100	0		0
TC1500001252.mm.1	-2.47	0.00801	-2.38	0.000724	-2.07	0.003826		TC1500001252.mm.1	Gm24713	predicted gene, 24713	-	ENSMUST00000178850	chr15	18009263 - 18009369	NonCoding		18009263	18009369	30			ENSMUST00000178850	ENSEMBL	ncrna:known chromosome:GRCm38:15:18009263:18009369:-1 gene:ENSMUSG00000096339 gene_biotype:snRNA transcript_biotype:snRNA	chr15	100	100	0		0
TC1500001631.mm.1	-4.95	0.000143	-4.7	0.002727	-2.25	0.025063		TC1500001631.mm.1			-		chr15	64133970 - 64135064	NonCoding		64133970	64135064	30			KnowTID_00008081	Luo lincRNA	Non-coding transcript identified by Luo, et al.	chr15	100	100	0		0
TC1500001685.mm.1	-2.63	0.000888	-2.33	0.002185	-3.04	0.002714		TC1500001685.mm.1			-		chr15	72689005 - 72692738	NonCoding		72689005	72692738	30			NONMMUT023867	NONCODE	Non-coding transcript identified by NONCODE: Sense No Exonic	chr15	100	100	0		0
TC1500001689.mm.1	-10.26	0.000644	-3.64	0.003487	-4.66	0.010534		TC1500001689.mm.1	Ago2	argonaute RISC catalytic subunit 2	-	NM_153178	chr15	73095844 - 73184947	Complex		73095844	73184947	305	15 D3|15	239528	NM_153178	RefSeq	Mus musculus argonaute RISC catalytic subunit 2 (Ago2), mRNA.	chr15	100	100	0		0	NM_153178	Q8CJG0	NM_153178	Mm.490340	adrenal gland| bladder| bone| bone marrow| brain| connective tissue| dorsal root ganglion| embryonic tissue| extraembryonic tissue| eye| heart| intestine| kidney| lung| mammary gland| ovary| pancreas| skin| spinal cord| spleen| thymus| vagina| unfertilized ovum| cleavage| morula| blastocyst| organogenesis| fetus| neonate| juvenile| adult	NM_153178	GO:0006351	transcription, DNA-templated	inferred from electronic annotation	NM_153178	GO:0000932	cytoplasmic mRNA processing body	inferred from direct assay	NM_153178	GO:0000340	RNA 7-methylguanosine cap binding	not recorded
TC1600000002.mm.1	-2.29	0.015986	-2.54	0.01882	-3.1	0.006753		TC1600000002.mm.1			+		chr16	3113752 - 3116673	NonCoding		3113752	3116673	30			NONMMUT025184	NONCODE	Non-coding transcript identified by NONCODE: Linc	chr16	100	100	0		0
TC1600001181.mm.1	-5.19	0.005631	-3.74	0.012049	-2.56	0.006844		TC1600001181.mm.1	Gm10247	predicted gene 10247	-	ENSMUST00000090395	chr16	8922057 - 8922389	Pseudogene		8922057	8922389	30			ENSMUST00000090395	ENSEMBL	ensembl:known chromosome:GRCm38:16:8922057:8922389:-1 gene:ENSMUSG00000068674 gene_biotype:pseudogene transcript_biotype:processed_pseudogene	chr16	100	100	0		0
TC1700002768.mm.1	-4.45	0.002877	-4.39	6.1e-05	-3.99	0.00088		TC1700002768.mm.1	9030025P20Rik	RIKEN cDNA 9030025P20 gene	+	NM_001123370	chr17	14978864 - 14991577	Coding		14978864	14991577	136	17 A2|17 8.95 cM	100041574	NM_001123370	RefSeq	Mus musculus RIKEN cDNA 9030025P20 gene (9030025P20Rik), mRNA.	chr17	100	100	0		0	NM_001123370	Q3TV04	NM_001123370	Mm.393767	bone| bone marrow| brain| embryonic tissue| epididymis| extraembryonic tissue| eye| heart| inner ear| intestine| kidney| lung| lymph node| mammary gland| muscle| pancreas| pituitary gland| salivary gland| skin| spleen| stomach| testis| thymus| uterus| cleavage| organogenesis| fetus| neonate| juvenile| adult	NM_001123370	GO:0008150	biological_process	no biological data available	NM_001123370	GO:0005575	cellular_component	no biological data available	NM_001123370	GO:0003674	molecular_function	no biological data available
TC1700002769.mm.1	-3.83	0.000818	-3.5	0.000166	-3.75	0.000337		TC1700002769.mm.1	Gm3435	predicted gene 3435	+	NM_001123372	chr17	15009840 - 15041419	Complex		15009840	15041419	201	17 A2|17	100041621	NM_001123372	RefSeq	Mus musculus predicted gene 3435 (Gm3435), mRNA.	chr17	100	100	0		0	NM_001123372	Q6P064	NM_001123372	Mm.458576	bladder| brain| embryonic tissue| eye| lung| mammary gland| pancreas| pituitary gland| skin| spleen| stomach| testis| thymus| fetus| juvenile| adult	NM_001123372	GO:0008150	biological_process	no biological data available	NM_001123372	GO:0005575	cellular_component	no biological data available	NM_001123372	GO:0003674	molecular_function	no biological data available
TC1700000174.mm.1	-3.96	0.014742	-2.53	0.003182	-4.54	0.01212		TC1700000174.mm.1			+		chr17	15000078 - 15000937	NonCoding		15000078	15000937	30			NONMMUT028345	NONCODE	Non-coding transcript identified by NONCODE: Antisense	chr17	100	100	0		0
TC1700000175.mm.1	-3.32	0.007733	-2.14	0.000914	-3.58	9.1e-05		TC1700000175.mm.1			+		chr17	15005664 - 15006241	NonCoding		15005664	15006241	30			NONMMUT028346	NONCODE	Non-coding transcript identified by NONCODE: Antisense	chr17	100	100	0		0
TC1700000176.mm.1	-2.31	0.002236	-2.07	0.000814	-2.36	0.002659		TC1700000176.mm.1	Ermard	ER membrane associated RNA degradation	+	NM_001034891	chr17	15041551 - 15074993	Complex		15041551	15074993	231	17 A2|17	381062	NM_001034891	RefSeq	Mus musculus ER membrane associated RNA degradation (Ermard), transcript variant 2, mRNA.	chr17	100	100	0		0	NM_001034891	B9EKF9	NM_001034891	Mm.482357	bone marrow| brain| embryonic tissue| extraembryonic tissue| eye| kidney| liver| lung| mammary gland| muscle| pancreas| skin| spinal cord| spleen| stomach| testis| thymus| thyroid| vagina| organogenesis| fetus| juvenile| adult	NM_001034891	GO:0008150	biological_process	no biological data available	NM_001034891	GO:0005575	cellular_component	no biological data available	NM_001034891	GO:0003674	molecular_function	no biological data available
TC1700000522.mm.1	-2.75	0.000713	-2.24	0.000236	-5.01	0.000107		TC1700000522.mm.1	Dnah8	dynein, axonemal, heavy chain 8	+	NM_013811	chr17	30624354 - 30875264	Complex		30624354	30875264	1000	17 A3.3|17	13417	NM_013811	RefSeq	Mus musculus dynein, axonemal, heavy chain 8 (Dnah8), mRNA.	chr17	100	100	0		0	NM_013811	Q91XQ0	NM_013811	Mm.426017	bone marrow| brain| embryonic tissue| heart| inner ear| mammary gland| ovary| spleen| testis| thymus|oocyte| cleavage| fetus| juvenile| adult	NM_013811	GO:0007018	microtubule-based movement	inferred from electronic annotation	NM_013811	GO:0005737	cytoplasm	inferred from electronic annotation	NM_013811	GO:0000166	nucleotide binding	inferred from electronic annotation
TC1700000975.mm.1	-2.24	0.00199	-2.11	0.001378	-2.09	0.020157		TC1700000975.mm.1	Kat2b	K(lysine) acetyltransferase 2B	+	NM_001190846	chr17	53566861 - 53672721	Complex		53566861	53672721	301	17 C|17 27.86 cM	18519	NM_001190846	RefSeq	Mus musculus K(lysine) acetyltransferase 2B (Kat2b), transcript variant 2, mRNA.	chr17	100	100	0		0	NM_001190846	Q9JHD1	NM_001190846	Mm.255025	blood| bone| bone marrow| brain| embryonic tissue| extraembryonic tissue| eye| heart| kidney| liver| lung| mammary gland| muscle| nasopharynx| pancreas| skin| spinal cord| spleen| sympathetic ganglion| testis| thymus| thyroid| turbinate| blastocyst| gastrula| organogenesis| fetus| neonate| juvenile| adult					NM_001190846	GO:0000123	histone acetyltransferase complex	inferred from direct assay
TC1700001038.mm.1	-5.67	0.000165	-4.03	4.1e-05	-6.56	0.000887		TC1700001038.mm.1	Gm5815	predicted pseudogene 5815	+	ENSMUST00000050706	chr17	58593659 - 58594843	Pseudogene		58593659	58594843	30			ENSMUST00000050706	ENSEMBL	ensembl:known chromosome:GRCm38:17:58593659:58594843:1 gene:ENSMUSG00000046952 gene_biotype:pseudogene transcript_biotype:processed_pseudogene	chr17	100	100	0		0
TC1700001173.mm.1	-2.21	0.010221	-2.89	0.017133	-2.72	0.001453		TC1700001173.mm.1	Rasgrp3	RAS, guanyl releasing protein 3	+	NM_001166493	chr17	75435905 - 75529054	Coding		75435905	75529054	210	17 E2|17	240168	NM_001166493	RefSeq	Mus musculus RAS, guanyl releasing protein 3 (Rasgrp3), transcript variant 1, mRNA.	chr17	100	100	0		0	NM_001166493	Q2PHE9	NM_001166493	Mm.329203	blood| brain| connective tissue| dorsal root ganglion| embryonic tissue| heart| intestine| kidney| lung| lymph node| mammary gland| muscle| pancreas| skin| spleen| testis| organogenesis| fetus| neonate| juvenile| adult	NM_001166493	GO:0007265	Ras protein signal transduction	inferred from direct assay	NM_001166493	GO:0005737	cytoplasm	inferred from direct assay	NM_001166493	GO:0005085	guanyl-nucleotide exchange factor activity	inferred from electronic annotation
TC1700001492.mm.1	-2.79	0.000587	-2.48	0.00132	-2.13	0.000405		TC1700001492.mm.1			-		chr17	15044141 - 15053374	NonCoding		15044141	15053374	30			uc008aod.1	UCSC Genes	Mus musculus adult male liver tumor cDNA, RIKEN full-length enriched library, clone:C730016N02 product:unclassifiable, full insert sequence.	chr17	100	100	0		0
TC1700001553.mm.1	-3.2	0.026305	-4.3	0.002969	-3.04	0.020988		TC1700001553.mm.1	Gm26384	predicted gene, 26384	-	ENSMUST00000102183	chr17	21284103 - 21284212	NonCoding		21284103	21284212	30			ENSMUST00000102183	ENSEMBL	ncrna:known chromosome:GRCm38:17:21284103:21284212:-1 gene:ENSMUSG00000076137 gene_biotype:miRNA transcript_biotype:miRNA	chr17	100	100	0		0
TC1700001779.mm.1	-4.97	0.018301	-3.8	0.021618	-2.53	0.0172		TC1700001779.mm.1	Rpl35a-ps3	ribosomal protein L35A, pseudogene 3	-	ENSMUST00000147311	chr17	29136972 - 29137304	Pseudogene		29136972	29137304	30			ENSMUST00000147311	ENSEMBL	ensembl_havana_transcript:known chromosome:GRCm38:17:29136972:29137304:-1 gene:ENSMUSG00000067575 gene_biotype:pseudogene transcript_biotype:processed_pseudogene	chr17	100	100	0		0
TC1700001807.mm.1	-2.35	0.000838	-2.21	0.000153	-2.11	0.025007		TC1700001807.mm.1	Gm24661	predicted gene, 24661	-	ENSMUST00000083205	chr17	30782026 - 30782129	NonCoding		30782026	30782129	30			ENSMUST00000083205	ENSEMBL	ncrna:known chromosome:GRCm38:17:30782026:30782129:-1 gene:ENSMUSG00000094785 gene_biotype:snRNA transcript_biotype:snRNA	chr17	100	100	0		0
TC1700001907.mm.1	-6.65	0.002213	-12.82	0.004144	-8.77	5.4e-05		TC1700001907.mm.1	H2-Ea-ps	histocompatibility 2, class II antigen E alpha, pseudogene	-	NM_010381	chr17	34341952 - 34347547	Complex		34341952	34347547	60	17 B1|17 17.98 cM	100504404	NM_010381	RefSeq	Mus musculus histocompatibility 2, class II antigen E alpha, pseudogene (H2-Ea-ps), mRNA.	chr17	100	100	0		0	NM_010381	P14439	NM_010381	Mm.15680	inner ear| kidney| lung| mammary gland| muscle| uterus| juvenile| adult	NM_010381	GO:0002376	immune system process	inferred from electronic annotation	NM_010381	GO:0016020	membrane	inferred from electronic annotation
TC1700001970.mm.1	-7.29	0.000753	-5.11	0.001133	-5.63	0.001622		TC1700001970.mm.1	Gm9613	predicted gene 9613	-	ENSMUST00000171662	chr17	35561923 - 35562118	Pseudogene		35561923	35562118	30			ENSMUST00000171662	ENSEMBL	havana:known chromosome:GRCm38:17:35561923:35562118:-1 gene:ENSMUSG00000092409 gene_biotype:pseudogene transcript_biotype:processed_pseudogene	chr17	100	100	0		0
TC1700002135.mm.1	-2.66	0.000363	-2.74	0.000522	-2.03	0.004027		TC1700002135.mm.1	Enpp4	ectonucleotide pyrophosphatase/phosphodiesterase 4	-	NM_199016	chr17	44096308 - 44105809	Complex		44096308	44105809	90	17 B3|17	224794	NM_199016	RefSeq	Mus musculus ectonucleotide pyrophosphatase/phosphodiesterase 4 (Enpp4), mRNA.	chr17	100	100	0		0	NM_199016	Q8BTJ4	NM_199016	Mm.255971	bladder| bone marrow| brain| embryonic tissue| eye| inner ear| intestine| kidney| lung| mammary gland| muscle| oviduct| pancreas| prostate| skin| spleen| sympathetic ganglion| testis| thymus| uterus| cleavage| organogenesis| fetus| neonate| juvenile| adult	NM_199016	GO:0007596	blood coagulation	inferred from electronic annotation	NM_199016	GO:0005886	plasma membrane	inferred from electronic annotation	NM_199016	GO:0003824	catalytic activity	inferred from electronic annotation
TC1700002397.mm.1	-3.32	0.033462	-3.58	0.043409	-3.06	0.030439		TC1700002397.mm.1			-		chr17	64049862 - 64050672	NonCoding		64049862	64050672	30			NONMMUT030229	NONCODE	Non-coding transcript identified by NONCODE: Antisense	chr17	100	100	0		0
TC1800000231.mm.1	-40.55	0.000184	-36.44	8e-06	-36.29	0.000423		TC1800000231.mm.1			+		chr18	30266682 - 30272287	NonCoding		30266682	30272287	30			NONMMUT031786	NONCODE	Non-coding transcript identified by NONCODE: Linc	chr18	100	100	0		0
TC1800001102.mm.1	-4.58	0.001793	-5.37	0.002077	-3.77	0.012118		TC1800001102.mm.1			-		chr18	30268819 - 30271548	NonCoding		30268819	30271548	30			NONMMUT031787	NONCODE	Non-coding transcript identified by NONCODE: Linc	chr18	100	100	0		0
TC1800001507.mm.1	-3.95	0.000554	-2.49	0.001343	-2.42	0.009846		TC1800001507.mm.1	Spire1	spire homolog 1 (Drosophila)	-	NM_176832	chr18	67488209 - 67610790	Complex		67488209	67610790	260	18 E1|18	68166	NM_176832	RefSeq	Mus musculus spire homolog 1 (Drosophila) (Spire1), transcript variant 2, mRNA.	chr18	100	100	0		0	NM_176832	Q52KF3	NM_176832	Mm.208723	bone| bone marrow| brain| dorsal root ganglion| embryonic tissue| eye| fertilized ovum| inner ear| kidney| lymph node| mammary gland| muscle| ovary| pancreas| salivary gland| skin| spleen| testis| uterus|oocyte| unfertilized ovum| zygote| cleavage| morula| blastocyst| organogenesis| fetus| neonate| juvenile| adult	NM_176832	GO:0006810	transport	inferred from electronic annotation	NM_176832	GO:0005622	intracellular	inferred from mutant phenotype	NM_176832	GO:0003779	actin binding	inferred from electronic annotation
TC1900000028.mm.1	-7.39	7e-06	-5.76	0.001034	-4.35	0.002059		TC1900000028.mm.1	Tmem134	transmembrane protein 134	+	NM_001078649	chr19	4125934 - 4132307	Complex		4125934	4132307	157	19 A|19	66990	NM_001078649	RefSeq	Mus musculus transmembrane protein 134 (Tmem134), transcript variant 1, mRNA.	chr19	100	100	0		0	NM_001078649	Q8R0J4	NM_001078649	Mm.276255	adipose tissue| bladder| bone| bone marrow| brain| connective tissue| embryonic tissue| epididymis| extraembryonic tissue| eye| heart| inner ear| intestine| joint| kidney| liver| lung| mammary gland| muscle| nasopharynx| olfactory mucosa| ovary| pancreas| salivary gland| spleen| stomach| testis| thymus| tongue|oocyte| organogenesis| fetus| neonate| juvenile| adult	NM_001078649	GO:0008150	biological_process	no biological data available	NM_001078649	GO:0016020	membrane	inferred from electronic annotation	NM_001078649	GO:0003674	molecular_function	no biological data available
TC1900000188.mm.1	-4.25	0.000387	-2.56	0.004981	-2.35	0.049075		TC1900000188.mm.1	Fads1	fatty acid desaturase 1	+	NM_146094	chr19	10182888 - 10196874	Coding		10182888	10196874	149	19 A|19	76267	NM_146094	RefSeq	Mus musculus fatty acid desaturase 1 (Fads1), mRNA.	chr19	100	100	0		0	NM_146094	Q920L1	NM_146094	Mm.30158	bladder| blood| bone| bone marrow| brain| connective tissue| dorsal root ganglion| embryonic tissue| epididymis| extraembryonic tissue| eye| fertilized ovum| heart| inner ear| intestine| joint| kidney| liver| lung| lymph node| mammary gland| muscle| ovary| pancreas| pituitary gland| prostate| salivary gland| skin| spinal cord| sympathetic ganglion| testis| thymus| tongue|oocyte| unfertilized ovum…	NM_146094	GO:0006629	lipid metabolic process	inferred from electronic annotation	NM_146094	GO:0005634	nucleus	not recorded	NM_146094	GO:0005506	iron ion binding	inferred from electronic annotation
TC1900000398.mm.1	-3.03	0.000213	-2.54	0.004413	-2.24	0.005732		TC1900000398.mm.1	Cycs	cytochrome c, somatic	+	ENSMUST00000073080	chr19	24875686 - 24876634	Coding		24875686	24876634	30	6 B2.3|6 24.32 cM	13063	ENSMUST00000073080	ENSEMBL	ensembl:known chromosome:GRCm38:19:24875686:24876634:1 gene:ENSMUSG00000058927 gene_biotype:protein_coding transcript_biotype:protein_coding	chr19	100	100	0		0	ENSMUST00000073080	P62897	ENSMUST00000073080	Mm.35389	blood| bone| bone marrow| brain| connective tissue| embryonic tissue| extraembryonic tissue| eye| heart| inner ear| intestine| joint| kidney| liver| lung| lymph node| mammary gland| molar| muscle| olfactory mucosa| ovary| pancreas| pituitary gland| prostate| salivary gland| skin| spleen| stomach| testis| thymus| thyroid| tongue|oocyte| cleavage| blastocyst| egg cylinder| gastrula| organogenesis| …	ENSMUST00000073080	GO:0006309	apoptotic DNA fragmentation	not recorded	ENSMUST00000073080	GO:0005634	nucleus	not recorded	ENSMUST00000073080	GO:0009055	electron carrier activity	not recorded	ENSMUST00000073080	GenMAPP
TC1900000487.mm.1	-3.21	0.019155	-2.52	0.00974	-2.18	0.023849		TC1900000487.mm.1	Gm23095	predicted gene, 23095	+	ENSMUST00000083446	chr19	33954235 - 33954341	NonCoding		33954235	33954341	30			ENSMUST00000083446	ENSEMBL	ncrna:known chromosome:GRCm38:19:33954235:33954341:1 gene:ENSMUSG00000065380 gene_biotype:snRNA transcript_biotype:snRNA	chr19	100	100	0		0
TC1900000711.mm.1	-2.36	0.005274	-2.23	0.004562	-2.09	0.033423		TC1900000711.mm.1	Cnnm2	cyclin M2	+	NM_001102471	chr19	46761596 - 46878795	Coding		46761596	46878795	90	19 C3|19 38.97 cM	94219	NM_001102471	RefSeq	Mus musculus cyclin M2 (Cnnm2), transcript variant 2, mRNA.	chr19	100	100	0		0	NM_001102471	Q3TWN3	NM_001102471	Mm.306903	adipose tissue| bone| bone marrow| brain| connective tissue| embryonic tissue| eye| kidney| lung| mammary gland| muscle| ovary| pancreas| skin| spinal cord| spleen| thymus| uterus|oocyte| cleavage| morula| fetus| neonate| juvenile| adult	NM_001102471	GO:0006810	transport	inferred from electronic annotation	NM_001102471	GO:0005886	plasma membrane	inferred from electronic annotation	NM_001102471	GO:0030554	adenyl nucleotide binding	inferred from electronic annotation
TC1900001061.mm.1	-8.44	0.000761	-14.92	0.001011	-6.44	2.4e-05		TC1900001061.mm.1			-		chr19	8479072 - 8491913	NonCoding		8479072	8491913	48			NONMMUT033780	NONCODE	Non-coding transcript identified by NONCODE: Linc	chr19	100	100	0		0
TC1900001169.mm.1	-3.18	0.000245	-3.01	3.6e-05	-2.46	0.008277		TC1900001169.mm.1	Zfp91	zinc finger protein 91	-	NM_053009	chr19	12763528 - 12796126	Complex		12763528	12796126	268	19 A|19 8.73 cM	109910	NM_053009	RefSeq	Mus musculus zinc finger protein 91 (Zfp91), mRNA.	chr19	100	100	0		0	NM_053009	P51642	NM_053009	Mm.290924	bladder| blood| bone| bone marrow| brain| embryonic tissue| epididymis| extraembryonic tissue| eye| fertilized ovum| heart| intestine| joint| kidney| liver| lung| lymph node| mammary gland| muscle| nasopharynx| ovary| pancreas| pineal gland| pituitary gland| prostate| skin| spinal cord| spleen| sympathetic ganglion| testis| thymus| thyroid| uterus|oocyte| unfertilized ovum| zygote| cleavage| moru…	NM_053009	GO:0007250	activation of NF-kappaB-inducing kinase activity	not recorded	NM_053009	GO:0005634	nucleus	inferred from electronic annotation	NM_053009	GO:0003676	nucleic acid binding	inferred from electronic annotation
TC1900001252.mm.1	-3.6	0.008427	-3.04	0.009954	-5.3	0.004569		TC1900001252.mm.1			-		chr19	21370911 - 21383933	NonCoding		21370911	21383933	30			NONMMUT034142	NONCODE	Non-coding transcript identified by NONCODE: Linc	chr19	100	100	0		0
TC1900001335.mm.1	-16.51	0.001532	-20.5	0.000112	-9.68	0.003369		TC1900001335.mm.1	Gm10136	predicted pseudogene 10136	-	ENSMUST00000075049	chr19	29003405 - 29003842	Pseudogene		29003405	29003842	30			ENSMUST00000075049	ENSEMBL	[retired] cdna:known chromosome:GRCm38:19:29003405:29003842:-1 gene:ENSMUSG00000063754 gene_biotype:protein_coding transcript_biotype:protein_coding	chr19	100	100	0		0
TC4_GL456216_random00000006.mm.1	-5.54	0.000493	-3.28	0.020065	-3.75	0.022515		TC4_GL456216_random00000006.mm.1			-		chr4_GL456216_random	9191 - 9815	NonCoding		9191	9815	30			KnowTID_00005514	Luo lincRNA	Non-coding transcript identified by Luo, et al.	chr4_GL456216_random	100	100	0		0
TSUnmapped00000017.mm.1	-2.89	0.004098	-2.99	0.006643	-5.18	0.003821		TSUnmapped00000017.mm.1	2410141K09Rik	RIKEN cDNA 2410141K09 gene		NM_001290196			Coding				30	13 B3|13	76803	NM_001290196	RefSeq	Mus musculus RIKEN cDNA 2410141K09 gene (2410141K09Rik), transcript variant 1, mRNA.		100	100	0		0	NM_001290196	G3UY85	NM_001290196	Mm.183391	embryonic tissue| testis| adult	NM_001290196	GO:0008150	biological_process	no biological data available	NM_001290196	GO:0005575	cellular_component	no biological data available	NM_001290196	GO:0046872	metal ion binding	inferred from electronic annotation
TSUnmapped00000028.mm.1	-2.93	0.000702	-2.77	0.004733	-2.7	0.003967		TSUnmapped00000028.mm.1	Defa-rs10	defensin, alpha, related sequence 10		NM_007845			Coding				30	8|8	13219	NM_007845	RefSeq	Mus musculus defensin, alpha, related sequence 10 (Defa-rs10), mRNA.		100	100	0		0	NM_007845	Q64263	NM_007845	Mm.423258	intestine| adult	NM_007845	GO:0006952	defense response	inferred from electronic annotation	NM_007845	GO:0005576	extracellular region	inferred from electronic annotation
TSUnmapped00000030.mm.1	-3.21	0.000443	-4.52	5.1e-05	-5.98	0.000582		TSUnmapped00000030.mm.1	H60a	histocompatibility 60a		NM_010400			Coding				30	10|10	15101	NM_010400	RefSeq	Mus musculus histocompatibility 60a (H60a), mRNA.		100	100	0		0	NM_010400	B1B212	NM_010400	Mm.387042	blood| connective tissue| lung| mammary gland| muscle| ovary| skin| thymus| neonate| juvenile| adult	NM_010400	GO:0002839	positive regulation of immune response to tumor cell	inferred from direct assay	NM_010400	GO:0005887	integral component of plasma membrane	inferred from direct assay	NM_010400	GO:0046703	natural killer cell lectin-like receptor binding	inferred from physical interaction
TSUnmapped00000034.mm.1	-3.86	0.00283	-3.68	0.001002	-3.25	0.000802		TSUnmapped00000034.mm.1	Defa-rs2	defensin, alpha, related sequence 2		NM_007847			Coding				30		13222	NM_007847	RefSeq	Mus musculus defensin, alpha, related sequence 2 (Defa-rs2), mRNA.		100	100	0		0	NM_007847	P17534	NM_007847	Mm.422993	intestine| adult	NM_007847	GO:0006952	defense response	inferred from electronic annotation	NM_007847	GO:0005576	extracellular region	inferred from electronic annotation
TSUnmapped00000061.mm.1	-2.45	0.003302	-2.72	6e-06	-3.1	0.002272		TSUnmapped00000061.mm.1	Defa-rs4	defensin, alpha,, related sequence 4		NM_001005418			Coding				30		13223	NM_001005418	RefSeq	Mus musculus defensin, alpha,, related sequence 4 (Defa-rs4), mRNA.		100	100	0		0	NM_001005418	Q70LV9	NM_001005418	Mm.424744		NM_001005418	GO:0006952	defense response	inferred from electronic annotation	NM_001005418	GO:0005576	extracellular region	inferred from electronic annotation	NM_001005418	GO:0001530	lipopolysaccharide binding	inferred from direct assay
[truncated: 27 more columns]
